# Supplementary material for: Identification of a neuronal transcription factor network involved in medulloblastoma development
Source: Acta Neuropathol Commun. 2013 Jul 11;1:35. doi: 10.1186/2051-5960-1-35 (PMC3893591; doi:10.1186/2051-5960-1-35)
Supplement: Additional file 12 — SB inserts in medulloblastomas Bed file containing all SB insertion site information from all medulloblastomas analysed, mapped against the NCBI37/mm9 genome build. [file 2051-5960-1-35-S12.BED]

chr10	100524380	100524381	3.MB-P-786-T-Brain_PTS11-786.L-454-SB042:R-454-SB138.NlaIII	1	-
chr10	100609483	100609484	1.MB-P-008-T-Brain_PTS11-008.LR-Barcode077-LR:LR-Barcode089-LR.NlaIII	1	+
chr10	100669394	100669395	3.MB-P-778-T-Brain_PTS11-778.L-454-SB034:R-454-SB130.NlaIII	2	+
chr10	100968864	100968865	3.MB-P-421-T-Brain_PTS11-421.null:R-454-SB111.NlaIII	2	-
chr10	101163332	101163333	3.MB-P-540-T-Brain_PTS11-540.null:R-454-SB118.NlaIII	1	+
chr10	101417107	101417108	1.MB-P-068-T-Brain_PTS11-068.LR-Barcode258-LR:LR-Barcode244-LR.BfaI	1	+
chr10	101478792	101478793	3.MB-P-704-T-Brain_PTS11-704.null:R-454-SB119.NlaIII	2	+
chr10	101575259	101575260	4.MB-P-754-T-Brain_PTS11-754.L-454-SB054:R-454-SB150.NlaIII	1	-
chr10	101681892	101681893	3.MB-P-704-T-Brain_PTS11-704.null:R-454-SB119.NlaIII	2	+
chr10	101759258	101759259	8.MB-P-704-T-Brain_PTS11-704.L-454-SB188:null.BfaI	1	-
chr10	101759664	101759665	3.MB-P-704-T-Brain_PTS11-704.null:R-454-SB119.NlaIII	2	+
chr10	101845200	101845201	4.MB-P-730-T-Brain_PTS11-730.L-454-SB046:R-454-SB142.NlaIII	1	+
chr10	102032607	102032608	4.MB-P-730-T-Brain_PTS11-730.L-454-SB046:R-454-SB142.NlaIII	1	+
chr10	102779442	102779443	1.MB-P-048-T-Brain_PTS11-048.LR-Barcode079-LR:LR-Barcode091-LR.NlaIII	1	+
chr10	103171882	103171883	6.MB-P-260-T-Brain_PTS11-260.L-454-SB018:R-454-SB114.BfaI	1	-
chr10	103496205	103496206	3.MB-P-704-T-Brain_PTS11-704.null:R-454-SB119.NlaIII	4	-
chr10	103896775	103896776	3.MB-P-786-T-Brain_PTS11-786.L-454-SB042:R-454-SB138.NlaIII	1	-
chr10	103986145	103986146	3.MB-P-786-T-Brain_PTS11-786.L-454-SB042:R-454-SB138.BfaI	1	+
chr10	104235735	104235736	3.MB-P-365-T-Brain_PTS11-365.L-454-SB009:R-454-SB105.NlaIII	4	-
chr10	104397053	104397054	1.MB-P-008-T-Brain_PTS11-008.LR-Barcode077-LR:LR-Barcode089-LR.BfaI	1	-
chr10	104641134	104641135	3.MB-P-224-T-Brain_PTS11-224.null:R-454-SB103.NlaIII	1	+
chr10	10466165	10466166	3.MB-P-849-T-Brain_PTS11-849.L-454-SB065:R-454-SB161.NlaIII	1	+
chr10	104662135	104662136	3.MB-P-457-T-Brain_PTS11-457.L-454-SB017:R-454-SB113.BfaI	1	-
chr10	104761850	104761851	3.MB-P-778-T-Brain_PTS11-778.L-454-SB034:R-454-SB130.NlaIII	1	-
chr10	105546637	105546638	3.MB-P-786-T-Brain_PTS11-786.L-454-SB042:R-454-SB138.NlaIII	2	+
chr10	105547355	105547356	3.MB-P-786-T-Brain_PTS11-786.L-454-SB042:R-454-SB138.NlaIII	1	+
chr10	105862259	105862260	3.MB-P-386-T-Brain_PTS11-386.null:R-454-SB154.NlaIII	1	+
chr10	106004206	106004207	3.MB-P-786-T-Brain_PTS11-786.L-454-SB042:R-454-SB138.NlaIII	1	+
chr10	106189990	106189991	1.MB-P-148-T-Brain_PTS11-148.LR-Barcode240-LR:LR-Barcode079-LR.NlaIII	1	+
chr10	10630735	10630736	8.MB-P-224-T-Brain_PTS11-224.L-454-SB191:null.BfaI	4	+
chr10	106317424	106317425	3.MB-P-224-T-Brain_PTS11-224.null:R-454-SB103.NlaIII	1	-
chr10	106692932	106692933	3.MB-P-786-T-Brain_PTS11-786.L-454-SB042:R-454-SB138.NlaIII	2	-
chr10	106868808	106868809	3.MB-P-704-T-Brain_PTS11-704.null:R-454-SB119.NlaIII	1	-
chr10	106915022	106915023	3.MB-P-849-T-Brain_PTS11-849.L-454-SB065:R-454-SB161.NlaIII	3	-
chr10	107680038	107680039	1.MB-P-048-T-Brain_PTS11-048.LR-Barcode079-LR:LR-Barcode091-LR.NlaIII	1	+
chr10	107706941	107706942	3.MB-P-619-T-Brain_PTS11-619.L-454-SB049:R-454-SB145.NlaIII	1	+
chr10	10790654	10790655	3.MB-P-793-T-Brain_PTS11-793.L-454-SB010:R-454-SB106.BfaI	2	-
chr10	107941908	107941909	1.MB-P-068-T-Brain_PTS11-068.LR-Barcode258-LR:LR-Barcode244-LR.NlaIII	1	-
chr10	108392926	108392927	3.MB-P-421-T-Brain_PTS11-421.null:R-454-SB111.NlaIII	1	-
chr10	10850673	10850674	1.MB-P-068-T-Brain_PTS11-068.LR-Barcode258-LR:LR-Barcode244-LR.BfaI	1	-
chr10	108529617	108529618	4.MB-P-754-T-Brain_PTS11-754.L-454-SB054:R-454-SB150.NlaIII	3	-
chr10	108566554	108566555	1.MB-P-068-T-Brain_PTS11-068.LR-Barcode258-LR:LR-Barcode244-LR.NlaIII	2	-
chr10	10909222	10909223	3.MB-P-793-T-Brain_PTS11-793.L-454-SB010:R-454-SB106.NlaIII	1	+
chr10	109182850	109182851	8.MB-P-224-T-Brain_PTS11-224.L-454-SB191:null.BfaI	2	+
chr10	109484052	109484053	3.MB-P-421-T-Brain_PTS11-421.null:R-454-SB111.NlaIII	1	-
chr10	110081667	110081668	3.MB-P-366-T-Brain_PTS11-366.null:R-454-SB131.NlaIII	3	+
chr10	110082011	110082012	3.MB-P-421-T-Brain_PTS11-421.null:R-454-SB111.NlaIII	1	+
chr10	110246734	110246735	1.MB-P-068-T-Brain_PTS11-068.LR-Barcode258-LR:LR-Barcode244-LR.BfaI	1	-
chr10	111079754	111079755	3.MB-P-793-T-Brain_PTS11-793.L-454-SB010:R-454-SB106.NlaIII	1	-
chr10	111189954	111189955	3.MB-P-786-T-Brain_PTS11-786.L-454-SB042:R-454-SB138.NlaIII	1	-
chr10	111573422	111573423	1.MB-P-008-T-Brain_PTS11-008.LR-Barcode077-LR:LR-Barcode089-LR.NlaIII	13	-
chr10	111896599	111896600	1.MB-P-008-T-Brain_PTS11-008.LR-Barcode077-LR:LR-Barcode089-LR.BfaI	1	-
chr10	111999598	111999599	3.MB-P-540-T-Brain_PTS11-540.null:R-454-SB118.NlaIII	6	-
chr10	112050107	112050108	3.MB-P-849-T-Brain_PTS11-849.L-454-SB065:R-454-SB161.NlaIII	1	-
chr10	112085727	112085728	3.MB-P-793-T-Brain_PTS11-793.L-454-SB010:R-454-SB106.NlaIII	3	-
chr10	112212319	112212320	3.MB-P-565-T-Brain_PTS11-565.L-454-SB033:R-454-SB129.NlaIII	1	-
chr10	112711154	112711155	3.MB-P-421-T-Brain_PTS11-421.null:R-454-SB111.NlaIII	1	-
chr10	112803273	112803274	3.MB-P-224-T-Brain_PTS11-224.null:R-454-SB103.NlaIII	1	-
chr10	112881617	112881618	3.MB-P-224-T-Brain_PTS11-224.null:R-454-SB103.NlaIII	1	+
chr10	113043428	113043429	3.MB-P-540-T-Brain_PTS11-540.null:R-454-SB118.NlaIII	20	-
chr10	113246845	113246846	1.MB-P-008-T-Brain_PTS11-008.LR-Barcode077-LR:LR-Barcode089-LR.BfaI	1	-
chr10	113406186	113406187	3.MB-P-786-T-Brain_PTS11-786.L-454-SB042:R-454-SB138.NlaIII	1	+
chr10	113582296	113582297	6.MB-P-349-T-Brain_PTS11-349.null:R-454-SB122.NlaIII	1	+
chr10	114036829	114036830	4.MB-P-730-T-Brain_PTS11-730.L-454-SB046:R-454-SB142.NlaIII	1	-
chr10	114483474	114483475	5.MB-P-280-T-Brain_PTS11-280.L-454-SB016:null.BfaI	1	-
chr10	114652335	114652336	3.MB-P-421-T-Brain_PTS11-421.null:R-454-SB111.NlaIII	1	-
chr10	115288098	115288099	1.MB-P-008-T-Brain_PTS11-008.LR-Barcode077-LR:LR-Barcode089-LR.BfaI.Freq=6|1.MB-P-008-T-Brain_PTS11-008.LR-Barcode077-LR:LR-Barcode089-LR.NlaIII.Freq=10	10	-
chr10	115469708	115469709	3.MB-P-778-T-Brain_PTS11-778.L-454-SB034:R-454-SB130.NlaIII	1	+
chr10	115499197	115499198	3.MB-P-849-T-Brain_PTS11-849.L-454-SB065:R-454-SB161.NlaIII	1	-
chr10	115520743	115520744	3.MB-P-778-T-Brain_PTS11-778.L-454-SB034:R-454-SB130.NlaIII	1	-
chr10	115858460	115858461	3.MB-P-280-T-Brain_PTS11-280.null:R-454-SB107.NlaIII	1	-
chr10	115929403	115929404	3.MB-P-580-T-Brain_PTS11-580.L-454-SB041:R-454-SB137.NlaIII	11	-
chr10	115984616	115984617	3.MB-P-565-T-Brain_PTS11-565.L-454-SB033:R-454-SB129.NlaIII	1	+
chr10	116645221	116645222	3.MB-P-224-T-Brain_PTS11-224.null:R-454-SB103.NlaIII	1	+
chr10	116776728	116776729	3.MB-P-116-T-Brain_PTS11-116.null:R-454-SB134.NlaIII	2	+
chr10	117564909	117564910	3.MB-P-421-T-Brain_PTS11-421.null:R-454-SB111.NlaIII	2	-
chr10	118030496	118030497	3.MB-P-778-T-Brain_PTS11-778.L-454-SB034:R-454-SB130.NlaIII	1	+
chr10	118877967	118877968	1.MB-P-068-T-Brain_PTS11-068.LR-Barcode258-LR:LR-Barcode244-LR.NlaIII	1	+
chr10	118884491	118884492	6.MB-P-883-T-Brain_PTS11-883.L-454-SB058:R-454-SB154.NlaIII	1	-
chr10	118915280	118915281	1.MB-P-048-T-Brain_PTS11-048.LR-Barcode079-LR:LR-Barcode091-LR.NlaIII	1	+
chr10	118941698	118941699	6.MB-P-833-T-Brain_PTS11-833.L-454-SB057:R-454-SB153.NlaIII	1	+
chr10	120312018	120312019	3.MB-P-778-T-Brain_PTS11-778.L-454-SB034:R-454-SB130.NlaIII	3	+
chr10	120337099	120337100	4.MB-P-730-T-Brain_PTS11-730.L-454-SB046:R-454-SB142.BfaI	1	-
chr10	120465364	120465365	3.MB-P-565-T-Brain_PTS11-565.L-454-SB033:R-454-SB129.NlaIII	1	+
chr10	120690804	120690805	3.MB-P-786-T-Brain_PTS11-786.L-454-SB042:R-454-SB138.NlaIII	1	-
chr10	120735249	120735250	3.MB-P-778-T-Brain_PTS11-778.L-454-SB034:R-454-SB130.NlaIII	1	-
chr10	121438818	121438819	3.MB-P-286-T-Brain_PTS11-286.null:R-454-SB115.NlaIII	1	+
chr10	121761453	121761454	3.MB-P-778-T-Brain_PTS11-778.L-454-SB034:R-454-SB130.NlaIII	5	-
chr10	121763425	121763426	3.MB-P-778-T-Brain_PTS11-778.L-454-SB034:R-454-SB130.NlaIII	6	+
chr10	121890790	121890791	3.MB-P-580-T-Brain_PTS11-580.L-454-SB041:R-454-SB137.NlaIII	1	-
chr10	122599015	122599016	3.MB-P-778-T-Brain_PTS11-778.L-454-SB034:R-454-SB130.NlaIII	2	+
chr10	123064000	123064001	3.MB-P-565-T-Brain_PTS11-565.L-454-SB033:R-454-SB129.NlaIII	1	-
chr10	123189002	123189003	3.MB-P-565-T-Brain_PTS11-565.L-454-SB033:R-454-SB129.NlaIII	3	+
chr10	123202471	123202472	3.MB-P-565-T-Brain_PTS11-565.L-454-SB033:R-454-SB129.NlaIII	1	+
chr10	123335216	123335217	3.MB-P-580-T-Brain_PTS11-580.L-454-SB041:R-454-SB137.NlaIII	1	+
chr10	123435529	123435530	3.MB-P-565-T-Brain_PTS11-565.L-454-SB033:R-454-SB129.NlaIII	10	-
chr10	123582826	123582827	3.MB-P-565-T-Brain_PTS11-565.L-454-SB033:R-454-SB129.NlaIII	7	-
chr10	123586854	123586855	3.MB-P-565-T-Brain_PTS11-565.L-454-SB033:R-454-SB129.NlaIII	1	-
chr10	123888734	123888735	3.MB-P-565-T-Brain_PTS11-565.L-454-SB033:R-454-SB129.NlaIII	2	-
chr10	123943104	123943105	3.MB-P-778-T-Brain_PTS11-778.L-454-SB034:R-454-SB130.NlaIII	1	-
chr10	124094741	124094742	3.MB-P-778-T-Brain_PTS11-778.L-454-SB034:R-454-SB130.NlaIII	1	+
chr10	124140617	124140618	3.MB-P-224-T-Brain_PTS11-224.null:R-454-SB103.NlaIII	1	+
chr10	124334274	124334275	6.MB-P-833-T-Brain_PTS11-833.L-454-SB057:R-454-SB153.NlaIII	3	+
chr10	124402085	124402086	3.MB-P-224-T-Brain_PTS11-224.null:R-454-SB103.NlaIII	1	+
chr10	124634378	124634379	3.MB-P-704-T-Brain_PTS11-704.null:R-454-SB119.NlaIII	1	-
chr10	124917603	124917604	3.MB-P-421-T-Brain_PTS11-421.null:R-454-SB111.NlaIII	1	+
chr10	125121310	125121311	3.MB-P-565-T-Brain_PTS11-565.L-454-SB033:R-454-SB129.NlaIII	1	+
chr10	12520321	12520322	3.MB-P-224-T-Brain_PTS11-224.null:R-454-SB103.NlaIII	1	-
chr10	125304341	125304342	6.MB-P-756-T-Brain_PTS11-756.L-454-SB042:R-454-SB138.NlaIII	2	-
chr10	125371694	125371695	3.MB-P-280-T-Brain_PTS11-280.null:R-454-SB107.NlaIII	1	+
chr10	125498521	125498522	1.MB-P-048-T-Brain_PTS11-048.LR-Barcode079-LR:LR-Barcode091-LR.NlaIII	1	-
chr10	125508080	125508081	6.MB-P-833-T-Brain_PTS11-833.L-454-SB057:R-454-SB153.NlaIII	1	+
chr10	125784217	125784218	3.MB-P-280-T-Brain_PTS11-280.null:R-454-SB107.NlaIII	5	-
chr10	125832407	125832408	3.MB-P-280-T-Brain_PTS11-280.null:R-454-SB107.NlaIII	1	+
chr10	125884818	125884819	1.MB-P-146-T-Brain_PTS11-146.LR-Barcode230-LR:LR-Barcode258-LR.BfaI	1	+
chr10	126145532	126145533	3.MB-P-224-T-Brain_PTS11-224.null:R-454-SB103.NlaIII	1	-
chr10	126193510	126193511	3.MB-P-704-T-Brain_PTS11-704.null:R-454-SB119.NlaIII	1	-
chr10	126266100	126266101	3.MB-P-366-T-Brain_PTS11-366.null:R-454-SB131.NlaIII	1	+
chr10	126884984	126884985	3.MB-P-786-T-Brain_PTS11-786.L-454-SB042:R-454-SB138.NlaIII	1	+
chr10	127177362	127177363	3.MB-P-580-T-Brain_PTS11-580.L-454-SB041:R-454-SB137.NlaIII	15	-
chr10	127300708	127300709	8.MB-P-751-T-Brain_PTS11-751.L-454-SB189:null.BfaI	2	-
chr10	127326819	127326820	3.MB-P-365-T-Brain_PTS11-365.L-454-SB009:R-454-SB105.NlaIII	2	+
chr10	12734882	12734883	4.MB-P-730-T-Brain_PTS11-730.L-454-SB046:R-454-SB142.NlaIII	1	-
chr10	127664381	127664382	3.MB-P-540-T-Brain_PTS11-540.null:R-454-SB118.NlaIII	1	+
chr10	127902897	127902898	3.MB-P-731-T-Brain_PTS11-731.L-454-SB057:null.BfaI	1	-
chr10	127950336	127950337	3.MB-P-421-T-Brain_PTS11-421.null:R-454-SB111.NlaIII	1	-
chr10	128303254	128303255	3.MB-P-778-T-Brain_PTS11-778.L-454-SB034:R-454-SB130.NlaIII	6	-
chr10	128389520	128389521	3.MB-P-421-T-Brain_PTS11-421.null:R-454-SB111.NlaIII	2	-
chr10	128932414	128932415	3.MB-P-224-T-Brain_PTS11-224.null:R-454-SB103.NlaIII	1	-
chr10	128935178	128935179	3.MB-P-565-T-Brain_PTS11-565.L-454-SB033:R-454-SB129.NlaIII	1	-
chr10	129210602	129210603	1.MB-P-008-T-Brain_PTS11-008.LR-Barcode077-LR:LR-Barcode089-LR.NlaIII	1	+
chr10	129540581	129540582	3.MB-P-704-T-Brain_PTS11-704.null:R-454-SB119.NlaIII	2	+
chr10	129840752	129840753	3.MB-P-791-T-Brain_PTS11-791.L-454-SB050:R-454-SB146.NlaIII	1	+
chr10	13241685	13241686	3.MB-P-580-T-Brain_PTS11-580.L-454-SB041:R-454-SB137.BfaI	20	+
chr10	13255464	13255465	3.MB-P-224-T-Brain_PTS11-224.null:R-454-SB103.NlaIII	2	+
chr10	13256055	13256056	3.MB-P-224-T-Brain_PTS11-224.null:R-454-SB103.NlaIII	1	+
chr10	13458044	13458045	3.MB-P-619-T-Brain_PTS11-619.L-454-SB049:R-454-SB145.BfaI	1	-
chr10	13488329	13488330	3.MB-P-224-T-Brain_PTS11-224.null:R-454-SB103.NlaIII	1	-
chr10	13703898	13703899	3.MB-P-280-T-Brain_PTS11-280.null:R-454-SB107.NlaIII	2	+
chr10	13755854	13755855	3.MB-P-793-T-Brain_PTS11-793.L-454-SB010:R-454-SB106.NlaIII	4	+
chr10	13815311	13815312	3.MB-P-540-T-Brain_PTS11-540.null:R-454-SB118.NlaIII	1	+
chr10	13817320	13817321	4.MB-P-754-T-Brain_PTS11-754.L-454-SB054:R-454-SB150.NlaIII	1	-
chr10	14072845	14072846	3.MB-P-849-T-Brain_PTS11-849.L-454-SB065:R-454-SB161.NlaIII	2	-
chr10	14410441	14410442	1.MB-P-146-T-Brain_PTS11-146.LR-Barcode230-LR:LR-Barcode258-LR.BfaI	5	+
chr10	14592968	14592969	1.MB-P-068-T-Brain_PTS11-068.LR-Barcode258-LR:LR-Barcode244-LR.NlaIII	1	+
chr10	14735081	14735082	4.MB-P-754-T-Brain_PTS11-754.L-454-SB054:R-454-SB150.NlaIII	1	+
chr10	14809253	14809254	4.MB-P-754-T-Brain_PTS11-754.L-454-SB054:R-454-SB150.NlaIII	11	-
chr10	14869610	14869611	3.MB-P-224-T-Brain_PTS11-224.null:R-454-SB103.NlaIII	6	+
chr10	14938084	14938085	2.MB-P-386-T-Brain_PTS11-386.LR-Barcode095-LR:null.BfaI	5	+
chr10	15210900	15210901	1.MB-P-008-T-Brain_PTS11-008.LR-Barcode077-LR:LR-Barcode089-LR.NlaIII	12	-
chr10	15451982	15451983	4.MB-P-754-T-Brain_PTS11-754.L-454-SB054:R-454-SB150.NlaIII	1	+
chr10	15765470	15765471	3.MB-P-224-T-Brain_PTS11-224.null:R-454-SB103.NlaIII	1	+
chr10	15803830	15803831	3.MB-P-224-T-Brain_PTS11-224.null:R-454-SB103.NlaIII	1	+
chr10	15808271	15808272	3.MB-P-565-T-Brain_PTS11-565.L-454-SB033:R-454-SB129.NlaIII	1	+
chr10	15845751	15845752	4.MB-P-754-T-Brain_PTS11-754.L-454-SB054:R-454-SB150.NlaIII	3	+
chr10	16020231	16020232	1.MB-P-008-T-Brain_PTS11-008.LR-Barcode077-LR:LR-Barcode089-LR.BfaI	1	-
chr10	16355847	16355848	3.MB-P-704-T-Brain_PTS11-704.null:R-454-SB119.NlaIII	4	+
chr10	16501109	16501110	3.MB-P-386-T-Brain_PTS11-386.null:R-454-SB154.NlaIII	1	-
chr10	16596350	16596351	3.MB-P-224-T-Brain_PTS11-224.null:R-454-SB103.NlaIII	1	+
chr10	16601651	16601652	3.MB-P-224-T-Brain_PTS11-224.null:R-454-SB103.NlaIII	2	-
chr10	16651289	16651290	3.MB-P-366-T-Brain_PTS11-366.null:R-454-SB131.NlaIII	1	-
chr10	16700692	16700693	4.MB-P-730-T-Brain_PTS11-730.L-454-SB046:R-454-SB142.NlaIII	1	-
chr10	16736436	16736437	1.MB-P-068-T-Brain_PTS11-068.LR-Barcode258-LR:LR-Barcode244-LR.BfaI	4	-
chr10	16829960	16829961	3.MB-P-224-T-Brain_PTS11-224.null:R-454-SB103.NlaIII	6	-
chr10	17099365	17099366	3.MB-P-224-T-Brain_PTS11-224.null:R-454-SB103.NlaIII	1	+
chr10	17161425	17161426	1.MB-P-008-T-Brain_PTS11-008.LR-Barcode077-LR:LR-Barcode089-LR.BfaI	1	+
chr10	17354306	17354307	8.MB-P-224-T-Brain_PTS11-224.L-454-SB191:null.BfaI	10	+
chr10	17388467	17388468	4.MB-P-754-T-Brain_PTS11-754.L-454-SB054:R-454-SB150.NlaIII	1	-
chr10	17846743	17846744	3.MB-P-224-T-Brain_PTS11-224.null:R-454-SB103.NlaIII	1	-
chr10	18123410	18123411	3.MB-P-224-T-Brain_PTS11-224.null:R-454-SB103.NlaIII	15	-
chr10	18210313	18210314	3.MB-P-457-T-Brain_PTS11-457.L-454-SB017:R-454-SB113.NlaIII	1	-
chr10	18243080	18243081	3.MB-P-704-T-Brain_PTS11-704.null:R-454-SB119.NlaIII	1	-
chr10	18677173	18677174	6.MB-P-349-T-Brain_PTS11-349.null:R-454-SB122.NlaIII	1	+
chr10	18773386	18773387	6.MB-P-260-T-Brain_PTS11-260.L-454-SB018:R-454-SB114.NlaIII	1	-
chr10	19243327	19243328	4.MB-P-730-T-Brain_PTS11-730.L-454-SB046:R-454-SB142.NlaIII	3	-
chr10	19579636	19579637	3.MB-P-704-T-Brain_PTS11-704.null:R-454-SB119.NlaIII	1	-
chr10	19793741	19793742	3.MB-P-224-T-Brain_PTS11-224.null:R-454-SB103.NlaIII	2	+
chr10	20258753	20258754	1.MB-P-048-T-Brain_PTS11-048.LR-Barcode079-LR:LR-Barcode091-LR.NlaIII	2	-
chr10	20397015	20397016	3.MB-P-619-T-Brain_PTS11-619.L-454-SB049:R-454-SB145.NlaIII	2	-
chr10	20466646	20466647	3.MB-P-511-T-Brain_PTS11-511.L-454-SB025:R-454-SB121.NlaIII	2	-
chr10	20863195	20863196	3.MB-P-386-T-Brain_PTS11-386.null:R-454-SB154.NlaIII	1	-
chr10	21325732	21325733	3.MB-P-793-T-Brain_PTS11-793.L-454-SB010:R-454-SB106.NlaIII	1	+
chr10	21519386	21519387	3.MB-P-849-T-Brain_PTS11-849.L-454-SB065:R-454-SB161.NlaIII	1	+
chr10	21700878	21700879	6.MB-P-883-T-Brain_PTS11-883.L-454-SB058:R-454-SB154.NlaIII	1	-
chr10	21797545	21797546	3.MB-P-793-T-Brain_PTS11-793.L-454-SB010:R-454-SB106.NlaIII	1	-
chr10	22369405	22369406	3.MB-P-224-T-Brain_PTS11-224.null:R-454-SB103.NlaIII	1	+
chr10	22988392	22988393	3.MB-P-751-T-Brain_PTS11-751.null:R-454-SB127.NlaIII	1	-
chr10	23769071	23769072	4.MB-P-754-T-Brain_PTS11-754.L-454-SB054:R-454-SB150.NlaIII	1	-
chr10	24123133	24123134	3.MB-P-793-T-Brain_PTS11-793.L-454-SB010:R-454-SB106.NlaIII	1	-
chr10	24283630	24283631	4.MB-P-730-T-Brain_PTS11-730.L-454-SB046:R-454-SB142.NlaIII	1	+
chr10	24519356	24519357	3.MB-P-224-T-Brain_PTS11-224.null:R-454-SB103.NlaIII	1	-
chr10	24591554	24591555	3.MB-P-704-T-Brain_PTS11-704.null:R-454-SB119.NlaIII	1	+
chr10	24881132	24881133	3.MB-P-511-T-Brain_PTS11-511.L-454-SB025:R-454-SB121.BfaI.Merge	9	-
chr10	24956517	24956518	3.MB-P-849-T-Brain_PTS11-849.L-454-SB065:R-454-SB161.NlaIII	1	-
chr10	25252907	25252908	3.MB-P-286-T-Brain_PTS11-286.null:R-454-SB115.NlaIII	1	+
chr10	25441188	25441189	3.MB-P-421-T-Brain_PTS11-421.null:R-454-SB111.NlaIII	1	-
chr10	25910540	25910541	3.MB-P-386-T-Brain_PTS11-386.null:R-454-SB154.NlaIII	2	+
chr10	25973090	25973091	4.MB-P-754-T-Brain_PTS11-754.L-454-SB054:R-454-SB150.BfaI	4	+
chr10	26349084	26349085	3.MB-P-580-T-Brain_PTS11-580.L-454-SB041:R-454-SB137.NlaIII	2	+
chr10	27104931	27104932	3.MB-P-457-T-Brain_PTS11-457.L-454-SB017:R-454-SB113.NlaIII	1	+
chr10	27198900	27198901	3.MB-P-386-T-Brain_PTS11-386.null:R-454-SB154.NlaIII	1	+
chr10	27200725	27200726	2.MB-P-386-T-Brain_PTS11-386.LR-Barcode095-LR:null.BfaI.Freq=1|3.MB-P-386-T-Brain_PTS11-386.null:R-454-SB154.NlaIII.Freq=2	2	+
chr10	27279984	27279985	6.MB-P-349-T-Brain_PTS11-349.null:R-454-SB122.NlaIII	1	+
chr10	27473184	27473185	3.MB-P-224-T-Brain_PTS11-224.null:R-454-SB103.NlaIII	2	+
chr10	27651366	27651367	1.MB-P-048-T-Brain_PTS11-048.LR-Barcode079-LR:LR-Barcode091-LR.NlaIII	1	-
chr10	28084329	28084330	3.MB-P-386-T-Brain_PTS11-386.null:R-454-SB154.NlaIII	1	-
chr10	28335174	28335175	3.MB-P-224-T-Brain_PTS11-224.null:R-454-SB103.NlaIII	1	-
chr10	28913932	28913933	1.MB-P-048-T-Brain_PTS11-048.LR-Barcode079-LR:LR-Barcode091-LR.NlaIII	1	+
chr10	30259784	30259785	2.MB-P-386-T-Brain_PTS11-386.LR-Barcode095-LR:null.BfaI	1	-
chr10	30277487	30277488	3.MB-P-565-T-Brain_PTS11-565.L-454-SB033:R-454-SB129.NlaIII	1	+
chr10	30479162	30479163	3.MB-P-793-T-Brain_PTS11-793.L-454-SB010:R-454-SB106.NlaIII	1	+
chr10	31405545	31405546	1.MB-P-008-T-Brain_PTS11-008.LR-Barcode077-LR:LR-Barcode089-LR.BfaI	1	+
chr10	31770152	31770153	2.MB-P-386-T-Brain_PTS11-386.LR-Barcode095-LR:null.BfaI	2	-
chr10	32135334	32135335	1.MB-P-008-T-Brain_PTS11-008.LR-Barcode077-LR:LR-Barcode089-LR.NlaIII	1	+
chr10	33127257	33127258	3.MB-P-224-T-Brain_PTS11-224.null:R-454-SB103.NlaIII	1	+
chr10	33196549	33196550	1.MB-P-008-T-Brain_PTS11-008.LR-Barcode077-LR:LR-Barcode089-LR.BfaI	2	-
chr10	33651218	33651219	3.MB-P-791-T-Brain_PTS11-791.L-454-SB050:R-454-SB146.NlaIII	3	-
chr10	34023991	34023992	3.MB-P-580-T-Brain_PTS11-580.L-454-SB041:R-454-SB137.BfaI	1	-
chr10	34084922	34084923	3.MB-P-580-T-Brain_PTS11-580.L-454-SB041:R-454-SB137.NlaIII	1	+
chr10	34314258	34314259	3.MB-P-704-T-Brain_PTS11-704.null:R-454-SB119.NlaIII	1	-
chr10	35385543	35385544	1.MB-P-068-T-Brain_PTS11-068.LR-Barcode258-LR:LR-Barcode244-LR.BfaI	1	+
chr10	35483402	35483403	3.MB-P-224-T-Brain_PTS11-224.null:R-454-SB103.NlaIII	1	-
chr10	35861796	35861797	1.MB-P-148-T-Brain_PTS11-148.LR-Barcode240-LR:LR-Barcode079-LR.BfaI	1	+
chr10	36344587	36344588	3.MB-P-224-T-Brain_PTS11-224.null:R-454-SB103.NlaIII	1	-
chr10	36481186	36481187	4.MB-P-730-T-Brain_PTS11-730.L-454-SB046:R-454-SB142.NlaIII	1	+
chr10	36714399	36714400	3.MB-P-116-T-Brain_PTS11-116.null:R-454-SB134.NlaIII	2	+
chr10	36892937	36892938	3.MB-P-016-T-Brain_PTS11-016.L-454-SB001:R-454-SB097.NlaIII	1	-
chr10	36894524	36894525	3.MB-P-580-T-Brain_PTS11-580.L-454-SB041:R-454-SB137.NlaIII	1	-
chr10	37090207	37090208	3.MB-P-778-T-Brain_PTS11-778.L-454-SB034:R-454-SB130.NlaIII	1	+
chr10	37222444	37222445	3.MB-P-511-T-Brain_PTS11-511.L-454-SB025:R-454-SB121.NlaIII	3	-
chr10	37377910	37377911	3.MB-P-457-T-Brain_PTS11-457.L-454-SB017:R-454-SB113.NlaIII	1	-
chr10	37549459	37549460	3.MB-P-386-T-Brain_PTS11-386.null:R-454-SB154.NlaIII	1	+
chr10	37754426	37754427	2.MB-P-386-T-Brain_PTS11-386.LR-Barcode095-LR:null.BfaI.Freq=11|3.MB-P-386-T-Brain_PTS11-386.null:R-454-SB154.NlaIII.Freq=3	11	+
chr10	37793048	37793049	3.MB-P-386-T-Brain_PTS11-386.null:R-454-SB154.NlaIII	1	+
chr10	37820152	37820153	1.MB-P-008-T-Brain_PTS11-008.LR-Barcode077-LR:LR-Barcode089-LR.BfaI.Freq=1|1.MB-P-008-T-Brain_PTS11-008.LR-Barcode077-LR:LR-Barcode089-LR.NlaIII.Freq=14	14	+
chr10	39139517	39139518	4.MB-P-730-T-Brain_PTS11-730.L-454-SB046:R-454-SB142.NlaIII	1	+
chr10	39676370	39676371	3.MB-P-224-T-Brain_PTS11-224.null:R-454-SB103.NlaIII	2	+
chr10	39684073	39684074	3.MB-P-386-T-Brain_PTS11-386.null:R-454-SB154.NlaIII	1	+
chr10	40546843	40546844	3.MB-P-540-T-Brain_PTS11-540.null:R-454-SB118.NlaIII	1	+
chr10	41058914	41058915	3.MB-P-366-T-Brain_PTS11-366.null:R-454-SB131.NlaIII	1	+
chr10	41144001	41144002	3.MB-P-286-T-Brain_PTS11-286.null:R-454-SB115.NlaIII	1	+
chr10	41832739	41832740	1.MB-P-148-T-Brain_PTS11-148.LR-Barcode240-LR:LR-Barcode079-LR.BfaI	1	-
chr10	41935923	41935924	1.MB-P-068-T-Brain_PTS11-068.LR-Barcode258-LR:LR-Barcode244-LR.BfaI	1	-
chr10	42015433	42015434	3.MB-P-778-T-Brain_PTS11-778.L-454-SB034:R-454-SB130.NlaIII	2	+
chr10	42560124	42560125	3.MB-P-849-T-Brain_PTS11-849.L-454-SB065:R-454-SB161.NlaIII	1	-
chr10	42840918	42840919	3.MB-P-421-T-Brain_PTS11-421.null:R-454-SB111.NlaIII	1	-
chr10	43071557	43071558	3.MB-P-580-T-Brain_PTS11-580.L-454-SB041:R-454-SB137.BfaI	8	-
chr10	43101727	43101728	3.MB-P-793-T-Brain_PTS11-793.L-454-SB010:R-454-SB106.NlaIII	1	+
chr10	43423128	43423129	3.MB-P-224-T-Brain_PTS11-224.null:R-454-SB103.NlaIII	1	+
chr10	43722930	43722931	1.MB-P-008-T-Brain_PTS11-008.LR-Barcode077-LR:LR-Barcode089-LR.BfaI	1	+
chr10	44294367	44294368	1.MB-P-008-T-Brain_PTS11-008.LR-Barcode077-LR:LR-Barcode089-LR.NlaIII	1	+
chr10	44407357	44407358	3.MB-P-524-T-Brain_PTS11-524.L-454-SB026:R-454-SB122.NlaIII	3	-
chr10	45309960	45309961	3.MB-P-580-T-Brain_PTS11-580.L-454-SB041:R-454-SB137.NlaIII	1	-
chr10	46226342	46226343	4.MB-P-730-T-Brain_PTS11-730.L-454-SB046:R-454-SB142.NlaIII	1	-
chr10	46336649	46336650	3.MB-P-224-T-Brain_PTS11-224.null:R-454-SB103.NlaIII	1	-
chr10	46902002	46902003	3.MB-P-224-T-Brain_PTS11-224.null:R-454-SB103.NlaIII	1	+
chr10	47080221	47080222	3.MB-P-849-T-Brain_PTS11-849.L-454-SB065:R-454-SB161.NlaIII	1	-
chr10	47798250	47798251	3.MB-P-791-T-Brain_PTS11-791.L-454-SB050:R-454-SB146.NlaIII	1	-
chr10	48045764	48045765	3.MB-P-793-T-Brain_PTS11-793.L-454-SB010:R-454-SB106.NlaIII	2	-
chr10	48837822	48837823	3.MB-P-619-T-Brain_PTS11-619.L-454-SB049:R-454-SB145.NlaIII	1	+
chr10	48853032	48853033	3.MB-P-619-T-Brain_PTS11-619.L-454-SB049:R-454-SB145.NlaIII	2	-
chr10	48896269	48896270	3.MB-P-366-T-Brain_PTS11-366.null:R-454-SB131.NlaIII	1	+
chr10	48905377	48905378	3.MB-P-619-T-Brain_PTS11-619.L-454-SB049:R-454-SB145.NlaIII	3	-
chr10	48993833	48993834	1.MB-P-008-T-Brain_PTS11-008.LR-Barcode077-LR:LR-Barcode089-LR.BfaI	1	-
chr10	49056512	49056513	8.MB-P-224-T-Brain_PTS11-224.L-454-SB191:null.BfaI.Freq=67|3.MB-P-224-T-Brain_PTS11-224.null:R-454-SB103.NlaIII.Freq=2	67	+
chr10	49101655	49101656	3.MB-P-224-T-Brain_PTS11-224.null:R-454-SB103.NlaIII	1	-
chr10	49451560	49451561	3.MB-P-849-T-Brain_PTS11-849.L-454-SB065:R-454-SB161.NlaIII	1	+
chr10	49478743	49478744	3.MB-P-224-T-Brain_PTS11-224.null:R-454-SB103.NlaIII	4	-
chr10	49889687	49889688	1.MB-P-008-T-Brain_PTS11-008.LR-Barcode077-LR:LR-Barcode089-LR.NlaIII	1	-
chr10	50383465	50383466	3.MB-P-580-T-Brain_PTS11-580.L-454-SB041:R-454-SB137.NlaIII	4	+
chr10	50403918	50403919	3.MB-P-540-T-Brain_PTS11-540.null:R-454-SB118.NlaIII	1	-
chr10	50667431	50667432	8.MB-P-421-T-Brain_PTS11-421.L-454-SB192:null.BfaI	3	-
chr10	50727663	50727664	4.MB-P-754-T-Brain_PTS11-754.L-454-SB054:R-454-SB150.NlaIII	1	+
chr10	50735221	50735222	3.MB-P-457-T-Brain_PTS11-457.L-454-SB017:R-454-SB113.NlaIII	1	-
chr10	51072339	51072340	3.MB-P-224-T-Brain_PTS11-224.null:R-454-SB103.NlaIII	1	+
chr10	51635180	51635181	1.MB-P-048-T-Brain_PTS11-048.LR-Barcode079-LR:LR-Barcode091-LR.NlaIII	1	-
chr10	52031321	52031322	3.MB-P-PM98-T-Brain_PM-98.null:R-454-SB126.NlaIII	1	+
chr10	52095933	52095934	1.MB-P-146-T-Brain_PTS11-146.LR-Barcode230-LR:LR-Barcode258-LR.NlaIII	1	+
chr10	52393734	52393735	3.MB-P-849-T-Brain_PTS11-849.L-454-SB065:R-454-SB161.NlaIII	2	+
chr10	52496277	52496278	3.MB-P-016-T-Brain_PTS11-016.L-454-SB001:R-454-SB097.NlaIII	1	-
chr10	52708201	52708202	3.MB-P-421-T-Brain_PTS11-421.null:R-454-SB111.NlaIII	1	-
chr10	52828802	52828803	3.MB-P-791-T-Brain_PTS11-791.L-454-SB050:R-454-SB146.NlaIII	1	+
chr10	53004819	53004820	3.MB-P-366-T-Brain_PTS11-366.null:R-454-SB131.NlaIII	1	-
chr10	53393911	53393912	3.MB-P-580-T-Brain_PTS11-580.L-454-SB041:R-454-SB137.BfaI	5	+
chr10	53440257	53440258	3.MB-P-786-T-Brain_PTS11-786.L-454-SB042:R-454-SB138.NlaIII	4	-
chr10	53572459	53572460	3.MB-P-751-T-Brain_PTS11-751.null:R-454-SB127.NlaIII	2	+
chr10	53910871	53910872	3.MB-P-751-T-Brain_PTS11-751.null:R-454-SB127.NlaIII	2	-
chr10	54240492	54240493	6.MB-P-260-T-Brain_PTS11-260.L-454-SB018:R-454-SB114.NlaIII	1	+
chr10	54293870	54293871	1.MB-P-068-T-Brain_PTS11-068.LR-Barcode258-LR:LR-Barcode244-LR.NlaIII	1	-
chr10	54383982	54383983	8.MB-P-286-T-Brain_PTS11-286.L-454-SB190:null.BfaI	1	-
chr10	54876118	54876119	6.MB-P-883-T-Brain_PTS11-883.L-454-SB058:R-454-SB154.BfaI	3	+
chr10	54878189	54878190	1.MB-P-008-T-Brain_PTS11-008.LR-Barcode077-LR:LR-Barcode089-LR.NlaIII	1	+
chr10	55103948	55103949	4.MB-P-730-T-Brain_PTS11-730.L-454-SB046:R-454-SB142.NlaIII	1	-
chr10	55203529	55203530	1.MB-P-068-T-Brain_PTS11-068.LR-Barcode258-LR:LR-Barcode244-LR.NlaIII	1	-
chr10	56717788	56717789	3.MB-P-524-T-Brain_PTS11-524.L-454-SB026:R-454-SB122.NlaIII	1	+
chr10	56948835	56948836	6.MB-P-833-T-Brain_PTS11-833.L-454-SB057:R-454-SB153.NlaIII	2	+
chr10	57004627	57004628	3.MB-P-524-T-Brain_PTS11-524.L-454-SB026:R-454-SB122.NlaIII	2	+
chr10	57273792	57273793	3.MB-P-751-T-Brain_PTS11-751.null:R-454-SB127.NlaIII	2	+
chr10	57339989	57339990	3.MB-P-224-T-Brain_PTS11-224.null:R-454-SB103.NlaIII	1	+
chr10	57768697	57768698	1.MB-P-068-T-Brain_PTS11-068.LR-Barcode258-LR:LR-Barcode244-LR.BfaI	1	-
chr10	58194075	58194076	1.MB-P-068-T-Brain_PTS11-068.LR-Barcode258-LR:LR-Barcode244-LR.NlaIII	1	+
chr10	58671440	58671441	3.MB-P-224-T-Brain_PTS11-224.null:R-454-SB103.NlaIII	1	-
chr10	59481355	59481356	3.MB-P-704-T-Brain_PTS11-704.null:R-454-SB119.NlaIII	3	+
chr10	59761979	59761980	3.MB-P-280-T-Brain_PTS11-280.null:R-454-SB107.NlaIII	2	-
chr10	59948126	59948127	1.MB-P-008-T-Brain_PTS11-008.LR-Barcode077-LR:LR-Barcode089-LR.NlaIII	1	+
chr10	60834901	60834902	6.MB-P-833-T-Brain_PTS11-833.L-454-SB057:R-454-SB153.NlaIII	1	+
chr10	60902568	60902569	3.MB-P-580-T-Brain_PTS11-580.L-454-SB041:R-454-SB137.NlaIII	5	+
chr10	61055302	61055303	1.MB-P-008-T-Brain_PTS11-008.LR-Barcode077-LR:LR-Barcode089-LR.BfaI	1	+
chr10	61238067	61238068	3.MB-P-619-T-Brain_PTS11-619.L-454-SB049:R-454-SB145.NlaIII	1	+
chr10	62098266	62098267	3.MB-P-565-T-Brain_PTS11-565.L-454-SB033:R-454-SB129.NlaIII	1	+
chr10	62219552	62219553	3.MB-P-366-T-Brain_PTS11-366.null:R-454-SB131.NlaIII	2	+
chr10	62321781	62321782	3.MB-P-580-T-Brain_PTS11-580.L-454-SB041:R-454-SB137.NlaIII	2	-
chr10	62599159	62599160	3.MB-P-580-T-Brain_PTS11-580.L-454-SB041:R-454-SB137.BfaI	7	-
chr10	62723700	62723701	6.MB-P-349-T-Brain_PTS11-349.null:R-454-SB122.NlaIII	1	-
chr10	63442593	63442594	3.MB-P-349-T-Brain_PTS11-349.L-454-SB002:null.BfaI	4	+
chr10	63616754	63616755	1.MB-P-008-T-Brain_PTS11-008.LR-Barcode077-LR:LR-Barcode089-LR.NlaIII	1	+
chr10	63725879	63725880	3.MB-P-580-T-Brain_PTS11-580.L-454-SB041:R-454-SB137.NlaIII	1	-
chr10	63776569	63776570	4.MB-P-754-T-Brain_PTS11-754.L-454-SB054:R-454-SB150.NlaIII	2	+
chr10	64637332	64637333	3.MB-P-580-T-Brain_PTS11-580.L-454-SB041:R-454-SB137.NlaIII	2	+
chr10	64643761	64643762	2.MB-P-386-T-Brain_PTS11-386.LR-Barcode095-LR:null.BfaI	1	+
chr10	6546799	6546800	4.MB-P-730-T-Brain_PTS11-730.L-454-SB046:R-454-SB142.NlaIII	1	+
chr10	65686251	65686252	3.MB-P-778-T-Brain_PTS11-778.L-454-SB034:R-454-SB130.NlaIII	1	+
chr10	65730685	65730686	3.MB-P-224-T-Brain_PTS11-224.null:R-454-SB103.NlaIII	1	-
chr10	66264930	66264931	3.MB-P-524-T-Brain_PTS11-524.L-454-SB026:R-454-SB122.NlaIII	1	-
chr10	6657903	6657904	1.MB-P-068-T-Brain_PTS11-068.LR-Barcode258-LR:LR-Barcode244-LR.NlaIII	1	+
chr10	67057169	67057170	1.MB-P-068-T-Brain_PTS11-068.LR-Barcode258-LR:LR-Barcode244-LR.NlaIII	2	+
chr10	67221374	67221375	3.MB-P-457-T-Brain_PTS11-457.L-454-SB017:R-454-SB113.NlaIII	1	-
chr10	67288813	67288814	1.MB-P-048-T-Brain_PTS11-048.LR-Barcode079-LR:LR-Barcode091-LR.BfaI	1	+
chr10	6884929	6884930	3.MB-P-224-T-Brain_PTS11-224.null:R-454-SB103.NlaIII	1	+
chr10	69273319	69273320	3.MB-P-580-T-Brain_PTS11-580.L-454-SB041:R-454-SB137.NlaIII	1	-
chr10	6954753	6954754	3.MB-P-580-T-Brain_PTS11-580.L-454-SB041:R-454-SB137.NlaIII	1	+
chr10	69581030	69581031	3.MB-P-580-T-Brain_PTS11-580.L-454-SB041:R-454-SB137.NlaIII	1	+
chr10	70048818	70048819	1.MB-P-048-T-Brain_PTS11-048.LR-Barcode079-LR:LR-Barcode091-LR.BfaI.Freq=1|1.MB-P-048-T-Brain_PTS11-048.LR-Barcode079-LR:LR-Barcode091-LR.NlaIII.Freq=1	1	-
chr10	70159075	70159076	3.MB-P-580-T-Brain_PTS11-580.L-454-SB041:R-454-SB137.NlaIII	2	-
chr10	70366441	70366442	3.MB-P-016-T-Brain_PTS11-016.L-454-SB001:R-454-SB097.NlaIII	2	+
chr10	70609127	70609128	3.MB-P-565-T-Brain_PTS11-565.L-454-SB033:R-454-SB129.NlaIII	1	+
chr10	71247010	71247011	4.MB-P-730-T-Brain_PTS11-730.L-454-SB046:R-454-SB142.NlaIII	2	-
chr10	71290029	71290030	1.MB-P-008-T-Brain_PTS11-008.LR-Barcode077-LR:LR-Barcode089-LR.NlaIII	1	-
chr10	72333472	72333473	3.MB-P-224-T-Brain_PTS11-224.null:R-454-SB103.NlaIII	1	-
chr10	72417102	72417103	3.MB-P-224-T-Brain_PTS11-224.null:R-454-SB103.NlaIII	1	+
chr10	72548428	72548429	1.MB-P-068-T-Brain_PTS11-068.LR-Barcode258-LR:LR-Barcode244-LR.BfaI	1	+
chr10	72590553	72590554	3.MB-P-224-T-Brain_PTS11-224.null:R-454-SB103.NlaIII	2	-
chr10	72795918	72795919	3.MB-P-511-T-Brain_PTS11-511.L-454-SB025:R-454-SB121.NlaIII	1	-
chr10	73195440	73195441	3.MB-P-793-T-Brain_PTS11-793.L-454-SB010:R-454-SB106.NlaIII	1	-
chr10	73365389	73365390	3.MB-P-421-T-Brain_PTS11-421.null:R-454-SB111.NlaIII	2	-
chr10	73436200	73436201	1.MB-P-148-T-Brain_PTS11-148.LR-Barcode240-LR:LR-Barcode079-LR.NlaIII	1	-
chr10	74116095	74116096	1.MB-P-008-T-Brain_PTS11-008.LR-Barcode077-LR:LR-Barcode089-LR.NlaIII	1	+
chr10	74224062	74224063	4.MB-P-730-T-Brain_PTS11-730.L-454-SB046:R-454-SB142.NlaIII	1	+
chr10	74601016	74601017	3.MB-P-540-T-Brain_PTS11-540.null:R-454-SB118.NlaIII	1	+
chr10	74611795	74611796	3.MB-P-224-T-Brain_PTS11-224.null:R-454-SB103.NlaIII	1	-
chr10	74755804	74755805	3.MB-P-421-T-Brain_PTS11-421.null:R-454-SB111.NlaIII	1	-
chr10	75424667	75424668	1.MB-P-068-T-Brain_PTS11-068.LR-Barcode258-LR:LR-Barcode244-LR.NlaIII	2	-
chr10	75547515	75547516	1.MB-P-008-T-Brain_PTS11-008.LR-Barcode077-LR:LR-Barcode089-LR.BfaI	1	-
chr10	75575218	75575219	6.MB-P-260-T-Brain_PTS11-260.L-454-SB018:R-454-SB114.NlaIII	1	-
chr10	75582709	75582710	3.MB-P-731-T-Brain_PTS11-731.L-454-SB057:null.BfaI	1	-
chr10	75621354	75621355	3.MB-P-731-T-Brain_PTS11-731.L-454-SB057:null.BfaI	1	-
chr10	75751950	75751951	3.MB-P-224-T-Brain_PTS11-224.null:R-454-SB103.NlaIII	1	+
chr10	7652349	7652350	3.MB-P-791-T-Brain_PTS11-791.L-454-SB050:R-454-SB146.NlaIII	1	+
chr10	7657083	7657084	3.MB-P-793-T-Brain_PTS11-793.L-454-SB010:R-454-SB106.BfaI	1	+
chr10	76731357	76731358	3.MB-P-704-T-Brain_PTS11-704.null:R-454-SB119.NlaIII	1	-
chr10	76851216	76851217	3.MB-P-751-T-Brain_PTS11-751.null:R-454-SB127.NlaIII	3	+
chr10	76870130	76870131	3.MB-P-565-T-Brain_PTS11-565.L-454-SB033:R-454-SB129.NlaIII	3	-
chr10	77170351	77170352	3.MB-P-386-T-Brain_PTS11-386.null:R-454-SB154.NlaIII	2	-
chr10	77493135	77493136	4.MB-P-730-T-Brain_PTS11-730.L-454-SB046:R-454-SB142.NlaIII	2	+
chr10	77802733	77802734	3.MB-P-511-T-Brain_PTS11-511.L-454-SB025:R-454-SB121.NlaIII	1	+
chr10	78374836	78374837	3.MB-P-457-T-Brain_PTS11-457.L-454-SB017:R-454-SB113.NlaIII	1	+
chr10	78682728	78682729	3.MB-P-580-T-Brain_PTS11-580.L-454-SB041:R-454-SB137.NlaIII	2	-
chr10	79089189	79089190	1.MB-P-068-T-Brain_PTS11-068.LR-Barcode258-LR:LR-Barcode244-LR.BfaI	1	-
chr10	79523985	79523986	3.MB-P-793-T-Brain_PTS11-793.L-454-SB010:R-454-SB106.NlaIII	2	-
chr10	79812224	79812225	3.MB-P-224-T-Brain_PTS11-224.null:R-454-SB103.NlaIII	2	-
chr10	8083658	8083659	4.MB-P-730-T-Brain_PTS11-730.L-454-SB046:R-454-SB142.BfaI	23	+
chr10	8128934	8128935	3.MB-P-224-T-Brain_PTS11-224.null:R-454-SB103.NlaIII	7	+
chr10	81690696	81690697	3.MB-P-793-T-Brain_PTS11-793.L-454-SB010:R-454-SB106.NlaIII	2	-
chr10	82024510	82024511	3.MB-P-366-T-Brain_PTS11-366.null:R-454-SB131.NlaIII	1	-
chr10	82209011	82209012	3.MB-P-565-T-Brain_PTS11-565.L-454-SB033:R-454-SB129.NlaIII	1	-
chr10	8228890	8228891	1.MB-P-146-T-Brain_PTS11-146.LR-Barcode230-LR:LR-Barcode258-LR.BfaI	1	+
chr10	82327628	82327629	1.MB-P-068-T-Brain_PTS11-068.LR-Barcode258-LR:LR-Barcode244-LR.BfaI	1	+
chr10	82597076	82597077	1.MB-P-048-T-Brain_PTS11-048.LR-Barcode079-LR:LR-Barcode091-LR.NlaIII	1	+
chr10	82646392	82646393	3.MB-P-704-T-Brain_PTS11-704.null:R-454-SB119.NlaIII	1	+
chr10	82855825	82855826	3.MB-P-786-T-Brain_PTS11-786.L-454-SB042:R-454-SB138.NlaIII	1	+
chr10	83397766	83397767	3.MB-P-786-T-Brain_PTS11-786.L-454-SB042:R-454-SB138.NlaIII	3	+
chr10	84078487	84078488	3.MB-P-791-T-Brain_PTS11-791.L-454-SB050:R-454-SB146.NlaIII	1	-
chr10	84628077	84628078	3.MB-P-580-T-Brain_PTS11-580.L-454-SB041:R-454-SB137.NlaIII	1	+
chr10	84872688	84872689	3.MB-P-286-T-Brain_PTS11-286.null:R-454-SB115.NlaIII	1	+
chr10	8586487	8586488	3.MB-P-524-T-Brain_PTS11-524.L-454-SB026:R-454-SB122.NlaIII	1	+
chr10	85868820	85868821	3.MB-P-580-T-Brain_PTS11-580.L-454-SB041:R-454-SB137.NlaIII	1	+
chr10	85874995	85874996	3.MB-P-786-T-Brain_PTS11-786.L-454-SB042:R-454-SB138.NlaIII	2	-
chr10	86005473	86005474	1.MB-P-008-T-Brain_PTS11-008.LR-Barcode077-LR:LR-Barcode089-LR.NlaIII	1	-
chr10	86398793	86398794	1.MB-P-008-T-Brain_PTS11-008.LR-Barcode077-LR:LR-Barcode089-LR.BfaI	1	-
chr10	86585254	86585255	1.MB-P-068-T-Brain_PTS11-068.LR-Barcode258-LR:LR-Barcode244-LR.NlaIII	1	+
chr10	86750666	86750667	3.MB-P-421-T-Brain_PTS11-421.null:R-454-SB111.NlaIII	1	+
chr10	87511874	87511875	3.MB-P-778-T-Brain_PTS11-778.L-454-SB034:R-454-SB130.NlaIII	1	+
chr10	87528868	87528869	3.MB-P-778-T-Brain_PTS11-778.L-454-SB034:R-454-SB130.NlaIII	2	-
chr10	87600491	87600492	1.MB-P-068-T-Brain_PTS11-068.LR-Barcode258-LR:LR-Barcode244-LR.BfaI	2	-
chr10	87909441	87909442	3.MB-P-PM98-T-Brain_PM-98.null:R-454-SB126.NlaIII	1	-
chr10	88131737	88131738	3.MB-P-751-T-Brain_PTS11-751.null:R-454-SB127.NlaIII	1	-
chr10	88359909	88359910	3.MB-P-224-T-Brain_PTS11-224.null:R-454-SB103.NlaIII	1	-
chr10	8899689	8899690	3.MB-P-786-T-Brain_PTS11-786.L-454-SB042:R-454-SB138.NlaIII	1	+
chr10	89066960	89066961	3.MB-P-524-T-Brain_PTS11-524.L-454-SB026:R-454-SB122.NlaIII	1	+
chr10	89346673	89346674	3.MB-P-457-T-Brain_PTS11-457.L-454-SB017:R-454-SB113.NlaIII	1	+
chr10	89828758	89828759	3.MB-P-778-T-Brain_PTS11-778.L-454-SB034:R-454-SB130.BfaI	6	+
chr10	89865788	89865789	8.MB-P-224-T-Brain_PTS11-224.L-454-SB191:null.BfaI	9	-
chr10	89897606	89897607	3.MB-P-849-T-Brain_PTS11-849.L-454-SB065:R-454-SB161.NlaIII	2	-
chr10	90077645	90077646	3.MB-P-457-T-Brain_PTS11-457.L-454-SB017:R-454-SB113.NlaIII	1	+
chr10	90127478	90127479	3.MB-P-386-T-Brain_PTS11-386.null:R-454-SB154.NlaIII	4	+
chr10	90512429	90512430	1.MB-P-068-T-Brain_PTS11-068.LR-Barcode258-LR:LR-Barcode244-LR.NlaIII	1	-
chr10	90572889	90572890	3.MB-P-224-T-Brain_PTS11-224.null:R-454-SB103.NlaIII	1	+
chr10	9101640	9101641	3.MB-P-540-T-Brain_PTS11-540.null:R-454-SB118.NlaIII	1	+
chr10	91101316	91101317	3.MB-P-704-T-Brain_PTS11-704.null:R-454-SB119.NlaIII	2	+
chr10	91116216	91116217	3.MB-P-793-T-Brain_PTS11-793.L-454-SB010:R-454-SB106.NlaIII	2	+
chr10	9117435	9117436	3.MB-P-224-T-Brain_PTS11-224.null:R-454-SB103.NlaIII	3	+
chr10	91513727	91513728	6.MB-P-883-T-Brain_PTS11-883.L-454-SB058:R-454-SB154.NlaIII	1	-
chr10	91924359	91924360	3.MB-P-280-T-Brain_PTS11-280.null:R-454-SB107.NlaIII	1	+
chr10	92149471	92149472	3.MB-P-286-T-Brain_PTS11-286.null:R-454-SB115.NlaIII	2	+
chr10	92700000	92700001	3.MB-P-793-T-Brain_PTS11-793.L-454-SB010:R-454-SB106.NlaIII	1	+
chr10	92733634	92733635	3.MB-P-580-T-Brain_PTS11-580.L-454-SB041:R-454-SB137.NlaIII	2	+
chr10	92751723	92751724	3.MB-P-580-T-Brain_PTS11-580.L-454-SB041:R-454-SB137.NlaIII	1	-
chr10	92795515	92795516	3.MB-P-524-T-Brain_PTS11-524.L-454-SB026:R-454-SB122.NlaIII	1	-
chr10	93096368	93096369	3.MB-P-540-T-Brain_PTS11-540.null:R-454-SB118.NlaIII	1	-
chr10	93135641	93135642	1.MB-P-068-T-Brain_PTS11-068.LR-Barcode258-LR:LR-Barcode244-LR.BfaI	1	-
chr10	93155490	93155491	3.MB-P-540-T-Brain_PTS11-540.null:R-454-SB118.NlaIII	3	+
chr10	93225221	93225222	1.MB-P-068-T-Brain_PTS11-068.LR-Barcode258-LR:LR-Barcode244-LR.NlaIII	1	-
chr10	93555594	93555595	3.MB-P-366-T-Brain_PTS11-366.null:R-454-SB131.NlaIII	2	-
chr10	9356506	9356507	3.MB-P-224-T-Brain_PTS11-224.null:R-454-SB103.NlaIII	1	-
chr10	93668336	93668337	3.MB-P-224-T-Brain_PTS11-224.null:R-454-SB103.NlaIII	1	+
chr10	9406943	9406944	3.MB-P-565-T-Brain_PTS11-565.L-454-SB033:R-454-SB129.NlaIII	2	-
chr10	94111532	94111533	3.MB-P-224-T-Brain_PTS11-224.null:R-454-SB103.NlaIII	1	+
chr10	94264194	94264195	3.MB-P-565-T-Brain_PTS11-565.L-454-SB033:R-454-SB129.NlaIII	1	+
chr10	9439997	9439998	3.MB-P-580-T-Brain_PTS11-580.L-454-SB041:R-454-SB137.NlaIII	2	+
chr10	94524260	94524261	3.MB-P-619-T-Brain_PTS11-619.L-454-SB049:R-454-SB145.NlaIII	4	+
chr10	94542149	94542150	1.MB-P-146-T-Brain_PTS11-146.LR-Barcode230-LR:LR-Barcode258-LR.NlaIII	1	-
chr10	94963629	94963630	1.MB-P-008-T-Brain_PTS11-008.LR-Barcode077-LR:LR-Barcode089-LR.BfaI	1	-
chr10	94995319	94995320	6.MB-P-260-T-Brain_PTS11-260.L-454-SB018:R-454-SB114.NlaIII	1	+
chr10	95866975	95866976	4.MB-P-730-T-Brain_PTS11-730.L-454-SB046:R-454-SB142.NlaIII	1	-
chr10	9591403	9591404	4.MB-P-754-T-Brain_PTS11-754.L-454-SB054:R-454-SB150.BfaI	5	-
chr10	96034512	96034513	3.MB-P-224-T-Brain_PTS11-224.null:R-454-SB103.NlaIII	1	-
chr10	96325930	96325931	4.MB-P-754-T-Brain_PTS11-754.L-454-SB054:R-454-SB150.NlaIII	1	+
chr10	96392419	96392420	3.MB-P-704-T-Brain_PTS11-704.null:R-454-SB119.NlaIII	1	-
chr10	96673100	96673101	3.MB-P-580-T-Brain_PTS11-580.L-454-SB041:R-454-SB137.BfaI	11	-
chr10	96852150	96852151	3.MB-P-786-T-Brain_PTS11-786.L-454-SB042:R-454-SB138.NlaIII	1	-
chr10	97071284	97071285	4.MB-P-730-T-Brain_PTS11-730.L-454-SB046:R-454-SB142.NlaIII	1	+
chr10	97214153	97214154	4.MB-P-754-T-Brain_PTS11-754.L-454-SB054:R-454-SB150.NlaIII	1	-
chr10	97270220	97270221	3.MB-P-511-T-Brain_PTS11-511.L-454-SB025:R-454-SB121.NlaIII	1	+
chr10	97428175	97428176	3.MB-P-421-T-Brain_PTS11-421.null:R-454-SB111.NlaIII	1	+
chr10	97473633	97473634	6.MB-P-756-T-Brain_PTS11-756.L-454-SB042:R-454-SB138.BfaI	5	+
chr10	97712701	97712702	4.MB-P-903-T-Brain_PTS11-903.L-454-SB062:null.BfaI	2	+
chr10	97722037	97722038	1.MB-P-048-T-Brain_PTS11-048.LR-Barcode079-LR:LR-Barcode091-LR.NlaIII	1	+
chr10	98079261	98079262	6.MB-P-833-T-Brain_PTS11-833.L-454-SB057:R-454-SB153.NlaIII	1	-
chr10	98414083	98414084	3.MB-P-793-T-Brain_PTS11-793.L-454-SB010:R-454-SB106.NlaIII	1	+
chr10	98575676	98575677	3.MB-P-580-T-Brain_PTS11-580.L-454-SB041:R-454-SB137.NlaIII	1	-
chr10	98787799	98787800	3.MB-P-540-T-Brain_PTS11-540.null:R-454-SB118.NlaIII	1	-
chr10	99101738	99101739	3.MB-P-280-T-Brain_PTS11-280.null:R-454-SB107.NlaIII	1	+
chr10	99260665	99260666	3.MB-P-849-T-Brain_PTS11-849.L-454-SB065:R-454-SB161.NlaIII	1	+
chr10	99362779	99362780	1.MB-P-146-T-Brain_PTS11-146.LR-Barcode230-LR:LR-Barcode258-LR.NlaIII	1	-
chr10	99729938	99729939	1.MB-P-048-T-Brain_PTS11-048.LR-Barcode079-LR:LR-Barcode091-LR.NlaIII	1	-
chr11	100018532	100018533	3.MB-P-778-T-Brain_PTS11-778.L-454-SB034:R-454-SB130.NlaIII	3	+
chr11	100648599	100648600	1.MB-P-048-T-Brain_PTS11-048.LR-Barcode079-LR:LR-Barcode091-LR.NlaIII	1	+
chr11	100962680	100962681	1.MB-P-146-T-Brain_PTS11-146.LR-Barcode230-LR:LR-Barcode258-LR.BfaI	1	-
chr11	101062861	101062862	3.MB-P-849-T-Brain_PTS11-849.L-454-SB065:R-454-SB161.NlaIII	1	+
chr11	101152055	101152056	3.MB-P-457-T-Brain_PTS11-457.L-454-SB017:R-454-SB113.NlaIII	1	+
chr11	101822730	101822731	3.MB-P-511-T-Brain_PTS11-511.L-454-SB025:R-454-SB121.NlaIII	2	-
chr11	10202212	10202213	4.MB-P-903-T-Brain_PTS11-903.L-454-SB062:null.BfaI	1	+
chr11	102031106	102031107	3.MB-P-704-T-Brain_PTS11-704.null:R-454-SB119.NlaIII	1	+
chr11	102196695	102196696	3.MB-P-704-T-Brain_PTS11-704.null:R-454-SB119.NlaIII	2	+
chr11	102539798	102539799	1.MB-P-146-T-Brain_PTS11-146.LR-Barcode230-LR:LR-Barcode258-LR.NlaIII	1	-
chr11	103066023	103066024	3.MB-P-386-T-Brain_PTS11-386.null:R-454-SB154.NlaIII	1	+
chr11	103345300	103345301	3.MB-P-524-T-Brain_PTS11-524.L-454-SB026:R-454-SB122.BfaI	1	-
chr11	103607849	103607850	3.MB-P-540-T-Brain_PTS11-540.null:R-454-SB118.NlaIII	1	+
chr11	103777279	103777280	4.MB-P-730-T-Brain_PTS11-730.L-454-SB046:R-454-SB142.NlaIII	3	+
chr11	103785709	103785710	3.MB-P-849-T-Brain_PTS11-849.L-454-SB065:R-454-SB161.NlaIII	2	+
chr11	103942778	103942779	4.MB-P-730-T-Brain_PTS11-730.L-454-SB046:R-454-SB142.NlaIII	3	+
chr11	10397734	10397735	4.MB-P-730-T-Brain_PTS11-730.L-454-SB046:R-454-SB142.NlaIII	2	-
chr11	104195335	104195336	6.MB-P-833-T-Brain_PTS11-833.L-454-SB057:R-454-SB153.NlaIII	1	+
chr11	104388678	104388679	1.MB-P-068-T-Brain_PTS11-068.LR-Barcode258-LR:LR-Barcode244-LR.BfaI	1	+
chr11	104813872	104813873	1.MB-P-008-T-Brain_PTS11-008.LR-Barcode077-LR:LR-Barcode089-LR.BfaI	1	+
chr11	104875165	104875166	6.MB-P-756-T-Brain_PTS11-756.L-454-SB042:R-454-SB138.NlaIII	2	+
chr11	104987283	104987284	3.MB-P-704-T-Brain_PTS11-704.null:R-454-SB119.NlaIII	1	-
chr11	105052205	105052206	6.MB-P-883-T-Brain_PTS11-883.L-454-SB058:R-454-SB154.BfaI	2	-
chr11	105055860	105055861	3.MB-P-457-T-Brain_PTS11-457.L-454-SB017:R-454-SB113.BfaI	1	-
chr11	105329970	105329971	3.MB-P-751-T-Brain_PTS11-751.null:R-454-SB127.NlaIII	1	-
chr11	105663626	105663627	1.MB-P-048-T-Brain_PTS11-048.LR-Barcode079-LR:LR-Barcode091-LR.BfaI	2	+
chr11	105857427	105857428	3.MB-P-791-T-Brain_PTS11-791.L-454-SB050:R-454-SB146.NlaIII	1	+
chr11	106083110	106083111	3.MB-P-PM98-T-Brain_PM-98.null:R-454-SB126.NlaIII	1	-
chr11	106365718	106365719	6.MB-P-260-T-Brain_PTS11-260.L-454-SB018:R-454-SB114.NlaIII	1	+
chr11	107147883	107147884	3.MB-P-511-T-Brain_PTS11-511.L-454-SB025:R-454-SB121.NlaIII	2	+
chr11	107691571	107691572	3.MB-P-704-T-Brain_PTS11-704.null:R-454-SB119.NlaIII	3	+
chr11	10772181	10772182	6.MB-P-835-T-Brain_PTS11-835.L-454-SB065:R-454-SB161.NlaIII	1	-
chr11	107859771	107859772	1.MB-P-008-T-Brain_PTS11-008.LR-Barcode077-LR:LR-Barcode089-LR.BfaI.Freq=132|1.MB-P-008-T-Brain_PTS11-008.LR-Barcode077-LR:LR-Barcode089-LR.NlaIII.Freq=122	132	-
chr11	107905713	107905714	3.MB-P-457-T-Brain_PTS11-457.L-454-SB017:R-454-SB113.NlaIII	1	+
chr11	108060727	108060728	3.MB-P-849-T-Brain_PTS11-849.L-454-SB065:R-454-SB161.NlaIII	4	+
chr11	108077885	108077886	3.MB-P-511-T-Brain_PTS11-511.L-454-SB025:R-454-SB121.NlaIII	1	-
chr11	108140190	108140191	3.MB-P-457-T-Brain_PTS11-457.L-454-SB017:R-454-SB113.NlaIII	1	+
chr11	109229610	109229611	3.MB-P-511-T-Brain_PTS11-511.L-454-SB025:R-454-SB121.NlaIII	1	+
chr11	109294634	109294635	3.MB-P-511-T-Brain_PTS11-511.L-454-SB025:R-454-SB121.BfaI.Freq=22|3.MB-P-511-T-Brain_PTS11-511.L-454-SB025:R-454-SB121.NlaIII.Freq=190	190	-
chr11	109297102	109297103	3.MB-P-511-T-Brain_PTS11-511.L-454-SB025:R-454-SB121.NlaIII	3	+
chr11	109577728	109577729	6.MB-P-833-T-Brain_PTS11-833.L-454-SB057:R-454-SB153.NlaIII	1	+
chr11	109597567	109597568	1.MB-P-068-T-Brain_PTS11-068.LR-Barcode258-LR:LR-Barcode244-LR.BfaI	1	-
chr11	109873669	109873670	3.MB-P-116-T-Brain_PTS11-116.null:R-454-SB134.NlaIII	1	+
chr11	109972365	109972366	3.MB-P-016-T-Brain_PTS11-016.L-454-SB001:R-454-SB097.NlaIII	2	+
chr11	110384411	110384412	3.MB-P-511-T-Brain_PTS11-511.L-454-SB025:R-454-SB121.NlaIII	1	+
chr11	110532406	110532407	3.MB-P-849-T-Brain_PTS11-849.L-454-SB065:R-454-SB161.NlaIII	1	+
chr11	110567008	110567009	3.MB-P-791-T-Brain_PTS11-791.L-454-SB050:R-454-SB146.NlaIII	2	-
chr11	110686131	110686132	3.MB-P-016-T-Brain_PTS11-016.L-454-SB001:R-454-SB097.NlaIII	2	+
chr11	111187670	111187671	3.MB-P-421-T-Brain_PTS11-421.null:R-454-SB111.NlaIII	2	+
chr11	111264175	111264176	3.MB-P-016-T-Brain_PTS11-016.L-454-SB001:R-454-SB097.NlaIII	3	+
chr11	111390702	111390703	3.MB-P-793-T-Brain_PTS11-793.L-454-SB010:R-454-SB106.NlaIII	4	+
chr11	111429703	111429704	3.MB-P-793-T-Brain_PTS11-793.L-454-SB010:R-454-SB106.NlaIII	1	-
chr11	111513750	111513751	4.MB-P-730-T-Brain_PTS11-730.L-454-SB046:R-454-SB142.NlaIII	1	+
chr11	111627058	111627059	1.MB-P-008-T-Brain_PTS11-008.LR-Barcode077-LR:LR-Barcode089-LR.NlaIII	1	+
chr11	111685311	111685312	3.MB-P-849-T-Brain_PTS11-849.L-454-SB065:R-454-SB161.NlaIII	1	-
chr11	111988886	111988887	1.MB-P-048-T-Brain_PTS11-048.LR-Barcode079-LR:LR-Barcode091-LR.BfaI	1	+
chr11	112503972	112503973	1.MB-P-146-T-Brain_PTS11-146.LR-Barcode230-LR:LR-Barcode258-LR.BfaI	2	+
chr11	112669562	112669563	3.MB-P-704-T-Brain_PTS11-704.null:R-454-SB119.NlaIII	2	-
chr11	113207098	113207099	8.MB-P-704-T-Brain_PTS11-704.L-454-SB188:null.BfaI.Freq=10|3.MB-P-704-T-Brain_PTS11-704.null:R-454-SB119.NlaIII.Freq=41	41	-
chr11	113219145	113219146	3.MB-P-704-T-Brain_PTS11-704.null:R-454-SB119.NlaIII	2	+
chr11	113859766	113859767	3.MB-P-580-T-Brain_PTS11-580.L-454-SB041:R-454-SB137.NlaIII	1	+
chr11	114182780	114182781	8.MB-P-286-T-Brain_PTS11-286.L-454-SB190:null.BfaI	5	+
chr11	114552239	114552240	3.MB-P-524-T-Brain_PTS11-524.L-454-SB026:R-454-SB122.NlaIII	1	-
chr11	114643223	114643224	3.MB-P-793-T-Brain_PTS11-793.L-454-SB010:R-454-SB106.NlaIII	1	+
chr11	114658312	114658313	3.MB-P-116-T-Brain_PTS11-116.null:R-454-SB134.NlaIII	2	-
chr11	114685457	114685458	3.MB-P-286-T-Brain_PTS11-286.null:R-454-SB115.NlaIII	1	+
chr11	114766829	114766830	3.MB-P-793-T-Brain_PTS11-793.L-454-SB010:R-454-SB106.NlaIII	1	+
chr11	114776996	114776997	3.MB-P-793-T-Brain_PTS11-793.L-454-SB010:R-454-SB106.NlaIII	1	-
chr11	114804881	114804882	3.MB-P-849-T-Brain_PTS11-849.L-454-SB065:R-454-SB161.NlaIII	1	+
chr11	115085818	115085819	3.MB-P-580-T-Brain_PTS11-580.L-454-SB041:R-454-SB137.BfaI.Freq=7|3.MB-P-580-T-Brain_PTS11-580.L-454-SB041:R-454-SB137.NlaIII.Freq=1	7	+
chr11	115226438	115226439	1.MB-P-008-T-Brain_PTS11-008.LR-Barcode077-LR:LR-Barcode089-LR.BfaI	2	-
chr11	115298972	115298973	3.MB-P-421-T-Brain_PTS11-421.null:R-454-SB111.NlaIII	1	-
chr11	115333827	115333828	3.MB-P-793-T-Brain_PTS11-793.L-454-SB010:R-454-SB106.NlaIII	1	-
chr11	116152105	116152106	3.MB-P-PM98-T-Brain_PM-98.null:R-454-SB126.NlaIII	1	-
chr11	116436527	116436528	1.MB-P-068-T-Brain_PTS11-068.LR-Barcode258-LR:LR-Barcode244-LR.BfaI	1	+
chr11	116974287	116974288	2.MB-P-386-T-Brain_PTS11-386.LR-Barcode095-LR:null.BfaI	1	-
chr11	117156656	117156657	3.MB-P-849-T-Brain_PTS11-849.L-454-SB065:R-454-SB161.NlaIII	1	-
chr11	117520619	117520620	2.MB-P-386-T-Brain_PTS11-386.LR-Barcode095-LR:null.BfaI	1	-
chr11	117535025	117535026	3.MB-P-540-T-Brain_PTS11-540.null:R-454-SB118.NlaIII	1	-
chr11	117566418	117566419	1.MB-P-146-T-Brain_PTS11-146.LR-Barcode230-LR:LR-Barcode258-LR.NlaIII	1	-
chr11	117644061	117644062	3.MB-P-540-T-Brain_PTS11-540.null:R-454-SB118.NlaIII	1	+
chr11	118176268	118176269	4.MB-P-903-T-Brain_PTS11-903.L-454-SB062:null.BfaI	10	-
chr11	118445030	118445031	3.MB-P-524-T-Brain_PTS11-524.L-454-SB026:R-454-SB122.NlaIII	1	-
chr11	118472391	118472392	3.MB-P-751-T-Brain_PTS11-751.null:R-454-SB127.NlaIII	1	-
chr11	118519385	118519386	1.MB-P-068-T-Brain_PTS11-068.LR-Barcode258-LR:LR-Barcode244-LR.NlaIII	1	+
chr11	118528879	118528880	3.MB-P-540-T-Brain_PTS11-540.null:R-454-SB118.NlaIII	1	+
chr11	118584349	118584350	3.MB-P-016-T-Brain_PTS11-016.L-454-SB001:R-454-SB097.NlaIII	1	+
chr11	119317565	119317566	3.MB-P-524-T-Brain_PTS11-524.L-454-SB026:R-454-SB122.NlaIII	1	-
chr11	11941043	11941044	3.MB-P-580-T-Brain_PTS11-580.L-454-SB041:R-454-SB137.BfaI	1	-
chr11	119602104	119602105	1.MB-P-146-T-Brain_PTS11-146.LR-Barcode230-LR:LR-Barcode258-LR.BfaI	1	-
chr11	119849708	119849709	1.MB-P-068-T-Brain_PTS11-068.LR-Barcode258-LR:LR-Barcode244-LR.BfaI.Freq=1|1.MB-P-068-T-Brain_PTS11-068.LR-Barcode258-LR:LR-Barcode244-LR.NlaIII.Freq=8	8	+
chr11	119957794	119957795	3.MB-P-778-T-Brain_PTS11-778.L-454-SB034:R-454-SB130.NlaIII	1	+
chr11	119981166	119981167	3.MB-P-619-T-Brain_PTS11-619.L-454-SB049:R-454-SB145.BfaI.Freq=16|3.MB-P-619-T-Brain_PTS11-619.L-454-SB049:R-454-SB145.NlaIII.Freq=8	16	-
chr11	120282349	120282350	3.MB-P-793-T-Brain_PTS11-793.L-454-SB010:R-454-SB106.NlaIII	1	+
chr11	120488375	120488376	6.MB-P-883-T-Brain_PTS11-883.L-454-SB058:R-454-SB154.NlaIII	7	-
chr11	120543926	120543927	6.MB-P-756-T-Brain_PTS11-756.L-454-SB042:R-454-SB138.NlaIII	1	+
chr11	121165290	121165291	1.MB-P-008-T-Brain_PTS11-008.LR-Barcode077-LR:LR-Barcode089-LR.BfaI	1	+
chr11	121513122	121513123	3.MB-P-704-T-Brain_PTS11-704.null:R-454-SB119.NlaIII	2	-
chr11	121624742	121624743	3.MB-P-366-T-Brain_PTS11-366.null:R-454-SB131.NlaIII	1	+
chr11	121628634	121628635	1.MB-P-148-T-Brain_PTS11-148.LR-Barcode240-LR:LR-Barcode079-LR.NlaIII	1	+
chr11	121647000	121647001	1.MB-P-008-T-Brain_PTS11-008.LR-Barcode077-LR:LR-Barcode089-LR.BfaI	1	+
chr11	121721825	121721826	3.MB-P-540-T-Brain_PTS11-540.null:R-454-SB118.NlaIII	1	+
chr11	12296327	12296328	3.MB-P-280-T-Brain_PTS11-280.null:R-454-SB107.NlaIII	1	+
chr11	12871178	12871179	8.MB-P-224-T-Brain_PTS11-224.L-454-SB191:null.BfaI	1	+
chr11	12976168	12976169	4.MB-P-730-T-Brain_PTS11-730.L-454-SB046:R-454-SB142.NlaIII	1	-
chr11	14222745	14222746	3.MB-P-386-T-Brain_PTS11-386.null:R-454-SB154.NlaIII	1	+
chr11	14739981	14739982	1.MB-P-146-T-Brain_PTS11-146.LR-Barcode230-LR:LR-Barcode258-LR.NlaIII	1	-
chr11	14834227	14834228	3.MB-P-580-T-Brain_PTS11-580.L-454-SB041:R-454-SB137.NlaIII	2	+
chr11	14854694	14854695	3.MB-P-224-T-Brain_PTS11-224.null:R-454-SB103.NlaIII	1	-
chr11	14904915	14904916	3.MB-P-791-T-Brain_PTS11-791.L-454-SB050:R-454-SB146.NlaIII	2	+
chr11	16030181	16030182	3.MB-P-580-T-Brain_PTS11-580.L-454-SB041:R-454-SB137.NlaIII	2	-
chr11	16100291	16100292	3.MB-P-565-T-Brain_PTS11-565.L-454-SB033:R-454-SB129.NlaIII	1	+
chr11	17040395	17040396	1.MB-P-008-T-Brain_PTS11-008.LR-Barcode077-LR:LR-Barcode089-LR.BfaI	1	-
chr11	17319902	17319903	3.MB-P-224-T-Brain_PTS11-224.null:R-454-SB103.NlaIII	1	+
chr11	17322589	17322590	3.MB-P-791-T-Brain_PTS11-791.L-454-SB050:R-454-SB146.NlaIII	1	+
chr11	17955204	17955205	3.MB-P-540-T-Brain_PTS11-540.null:R-454-SB118.NlaIII	1	-
chr11	18498736	18498737	3.MB-P-704-T-Brain_PTS11-704.null:R-454-SB119.NlaIII	1	-
chr11	18784657	18784658	3.MB-P-016-T-Brain_PTS11-016.L-454-SB001:R-454-SB097.NlaIII	1	+
chr11	18935972	18935973	3.MB-P-704-T-Brain_PTS11-704.null:R-454-SB119.NlaIII	2	-
chr11	19082991	19082992	8.MB-P-751-T-Brain_PTS11-751.L-454-SB189:null.BfaI	4	+
chr11	19228201	19228202	3.MB-P-286-T-Brain_PTS11-286.null:R-454-SB115.NlaIII	1	-
chr11	19809646	19809647	3.MB-P-849-T-Brain_PTS11-849.L-454-SB065:R-454-SB161.NlaIII	1	+
chr11	19917256	19917257	3.MB-P-421-T-Brain_PTS11-421.null:R-454-SB111.NlaIII	2	+
chr11	20249806	20249807	1.MB-P-048-T-Brain_PTS11-048.LR-Barcode079-LR:LR-Barcode091-LR.NlaIII	1	-
chr11	20447845	20447846	3.MB-P-791-T-Brain_PTS11-791.L-454-SB050:R-454-SB146.NlaIII	1	+
chr11	21019378	21019379	3.MB-P-849-T-Brain_PTS11-849.L-454-SB065:R-454-SB161.NlaIII	1	+
chr11	21371628	21371629	3.MB-P-849-T-Brain_PTS11-849.L-454-SB065:R-454-SB161.NlaIII	1	+
chr11	21759289	21759290	3.MB-P-704-T-Brain_PTS11-704.null:R-454-SB119.NlaIII	1	+
chr11	21989318	21989319	3.MB-P-704-T-Brain_PTS11-704.null:R-454-SB119.NlaIII	2	+
chr11	22251675	22251676	3.MB-P-704-T-Brain_PTS11-704.null:R-454-SB119.NlaIII	1	+
chr11	22284966	22284967	3.MB-P-849-T-Brain_PTS11-849.L-454-SB065:R-454-SB161.NlaIII	3	+
chr11	22771387	22771388	3.MB-P-524-T-Brain_PTS11-524.L-454-SB026:R-454-SB122.NlaIII	1	+
chr11	22846874	22846875	4.MB-P-730-T-Brain_PTS11-730.L-454-SB046:R-454-SB142.NlaIII	1	-
chr11	23274007	23274008	3.MB-P-791-T-Brain_PTS11-791.L-454-SB050:R-454-SB146.NlaIII	2	-
chr11	23587737	23587738	1.MB-P-048-T-Brain_PTS11-048.LR-Barcode079-LR:LR-Barcode091-LR.NlaIII	1	-
chr11	23770871	23770872	3.MB-P-565-T-Brain_PTS11-565.L-454-SB033:R-454-SB129.NlaIII	1	-
chr11	23806057	23806058	3.MB-P-224-T-Brain_PTS11-224.null:R-454-SB103.NlaIII	2	+
chr11	24639540	24639541	3.MB-P-511-T-Brain_PTS11-511.L-454-SB025:R-454-SB121.NlaIII	1	-
chr11	25240950	25240951	3.MB-P-457-T-Brain_PTS11-457.L-454-SB017:R-454-SB113.NlaIII	1	-
chr11	25809685	25809686	3.MB-P-421-T-Brain_PTS11-421.null:R-454-SB111.NlaIII	1	-
chr11	26216307	26216308	1.MB-P-008-T-Brain_PTS11-008.LR-Barcode077-LR:LR-Barcode089-LR.NlaIII	1	-
chr11	26233633	26233634	1.MB-P-008-T-Brain_PTS11-008.LR-Barcode077-LR:LR-Barcode089-LR.NlaIII	12	-
chr11	26473082	26473083	1.MB-P-146-T-Brain_PTS11-146.LR-Barcode230-LR:LR-Barcode258-LR.NlaIII	1	+
chr11	26906346	26906347	6.MB-P-833-T-Brain_PTS11-833.L-454-SB057:R-454-SB153.NlaIII	1	-
chr11	27171182	27171183	3.MB-P-224-T-Brain_PTS11-224.null:R-454-SB103.NlaIII	1	-
chr11	27547714	27547715	3.MB-P-421-T-Brain_PTS11-421.null:R-454-SB111.NlaIII	1	+
chr11	27743808	27743809	3.MB-P-421-T-Brain_PTS11-421.null:R-454-SB111.NlaIII	1	-
chr11	27909956	27909957	3.MB-P-619-T-Brain_PTS11-619.L-454-SB049:R-454-SB145.NlaIII	2	-
chr11	28154503	28154504	3.MB-P-224-T-Brain_PTS11-224.null:R-454-SB103.NlaIII	1	+
chr11	28212213	28212214	3.MB-P-580-T-Brain_PTS11-580.L-454-SB041:R-454-SB137.NlaIII	1	+
chr11	29180137	29180138	3.MB-P-791-T-Brain_PTS11-791.L-454-SB050:R-454-SB146.NlaIII	1	+
chr11	29270660	29270661	4.MB-P-730-T-Brain_PTS11-730.L-454-SB046:R-454-SB142.NlaIII	1	-
chr11	29333899	29333900	3.MB-P-704-T-Brain_PTS11-704.null:R-454-SB119.NlaIII	4	+
chr11	29643166	29643167	3.MB-P-704-T-Brain_PTS11-704.null:R-454-SB119.NlaIII	1	-
chr11	29739051	29739052	3.MB-P-365-T-Brain_PTS11-365.L-454-SB009:R-454-SB105.NlaIII	2	-
chr11	29746176	29746177	3.MB-P-224-T-Brain_PTS11-224.null:R-454-SB103.NlaIII	1	+
chr11	3042961	3042962	3.MB-P-793-T-Brain_PTS11-793.L-454-SB010:R-454-SB106.NlaIII	1	+
chr11	3058236	3058237	4.MB-P-730-T-Brain_PTS11-730.L-454-SB046:R-454-SB142.NlaIII	2	-
chr11	3061140	3061141	4.MB-P-730-T-Brain_PTS11-730.L-454-SB046:R-454-SB142.NlaIII	1	-
chr11	3071580	3071581	3.MB-P-016-T-Brain_PTS11-016.L-454-SB001:R-454-SB097.NlaIII	7	+
chr11	3087185	3087186	3.MB-P-421-T-Brain_PTS11-421.null:R-454-SB111.NlaIII	2	-
chr11	3093909	3093910	7.MB-P-288-T-Brain_PTS11-288.L-454-SB190:R-454-SB199.BfaI	2	+
chr11	30993744	30993745	3.MB-P-704-T-Brain_PTS11-704.null:R-454-SB119.NlaIII	5	-
chr11	3190982	3190983	3.MB-P-421-T-Brain_PTS11-421.null:R-454-SB111.NlaIII	1	+
chr11	3200126	3200127	3.MB-P-704-T-Brain_PTS11-704.null:R-454-SB119.NlaIII	1	-
chr11	32201508	32201509	3.MB-P-511-T-Brain_PTS11-511.L-454-SB025:R-454-SB121.NlaIII	1	+
chr11	32423174	32423175	3.MB-P-751-T-Brain_PTS11-751.null:R-454-SB127.NlaIII	1	-
chr11	32549422	32549423	3.MB-P-791-T-Brain_PTS11-791.L-454-SB050:R-454-SB146.NlaIII	3	+
chr11	32598803	32598804	3.MB-P-457-T-Brain_PTS11-457.L-454-SB017:R-454-SB113.NlaIII	3	+
chr11	33182280	33182281	3.MB-P-457-T-Brain_PTS11-457.L-454-SB017:R-454-SB113.NlaIII	1	+
chr11	33483161	33483162	3.MB-P-580-T-Brain_PTS11-580.L-454-SB041:R-454-SB137.NlaIII	1	+
chr11	33651929	33651930	3.MB-P-619-T-Brain_PTS11-619.L-454-SB049:R-454-SB145.NlaIII	1	+
chr11	33720871	33720872	3.MB-P-386-T-Brain_PTS11-386.null:R-454-SB154.NlaIII	1	-
chr11	33804143	33804144	3.MB-P-704-T-Brain_PTS11-704.null:R-454-SB119.NlaIII	1	+
chr11	33847224	33847225	3.MB-P-580-T-Brain_PTS11-580.L-454-SB041:R-454-SB137.NlaIII	24	+
chr11	33937544	33937545	3.MB-P-704-T-Brain_PTS11-704.null:R-454-SB119.NlaIII	1	-
chr11	34037437	34037438	3.MB-P-704-T-Brain_PTS11-704.null:R-454-SB119.NlaIII	1	-
chr11	34417564	34417565	3.MB-P-704-T-Brain_PTS11-704.null:R-454-SB119.NlaIII	2	+
chr11	34523748	34523749	3.MB-P-751-T-Brain_PTS11-751.null:R-454-SB127.NlaIII	1	-
chr11	34959960	34959961	3.MB-P-704-T-Brain_PTS11-704.null:R-454-SB119.NlaIII	2	+
chr11	35030424	35030425	3.MB-P-704-T-Brain_PTS11-704.null:R-454-SB119.NlaIII	3	-
chr11	35091265	35091266	3.MB-P-704-T-Brain_PTS11-704.null:R-454-SB119.NlaIII	1	+
chr11	35143521	35143522	3.MB-P-704-T-Brain_PTS11-704.null:R-454-SB119.NlaIII	1	-
chr11	35145276	35145277	3.MB-P-016-T-Brain_PTS11-016.L-454-SB001:R-454-SB097.NlaIII	1	+
chr11	35152920	35152921	3.MB-P-793-T-Brain_PTS11-793.L-454-SB010:R-454-SB106.NlaIII	1	-
chr11	35202674	35202675	3.MB-P-386-T-Brain_PTS11-386.null:R-454-SB154.NlaIII	1	+
chr11	35244267	35244268	3.MB-P-286-T-Brain_PTS11-286.null:R-454-SB115.NlaIII	2	-
chr11	35280650	35280651	3.MB-P-704-T-Brain_PTS11-704.null:R-454-SB119.NlaIII	3	-
chr11	35337117	35337118	4.MB-P-754-T-Brain_PTS11-754.L-454-SB054:R-454-SB150.NlaIII	2	-
chr11	35337206	35337207	1.MB-P-048-T-Brain_PTS11-048.LR-Barcode079-LR:LR-Barcode091-LR.NlaIII	1	+
chr11	35454280	35454281	1.MB-P-008-T-Brain_PTS11-008.LR-Barcode077-LR:LR-Barcode089-LR.NlaIII	1	+
chr11	35558705	35558706	3.MB-P-849-T-Brain_PTS11-849.L-454-SB065:R-454-SB161.NlaIII	2	+
chr11	35857007	35857008	3.MB-P-619-T-Brain_PTS11-619.L-454-SB049:R-454-SB145.NlaIII	4	-
chr11	35951791	35951792	3.MB-P-704-T-Brain_PTS11-704.null:R-454-SB119.NlaIII	1	-
chr11	35990306	35990307	3.MB-P-224-T-Brain_PTS11-224.null:R-454-SB103.NlaIII	1	-
chr11	3607057	3607058	3.MB-P-580-T-Brain_PTS11-580.L-454-SB041:R-454-SB137.NlaIII	1	-
chr11	36203881	36203882	3.MB-P-619-T-Brain_PTS11-619.L-454-SB049:R-454-SB145.NlaIII	1	-
chr11	36384450	36384451	3.MB-P-751-T-Brain_PTS11-751.null:R-454-SB127.NlaIII	1	+
chr11	36460646	36460647	3.MB-P-540-T-Brain_PTS11-540.null:R-454-SB118.NlaIII	1	+
chr11	36724774	36724775	3.MB-P-704-T-Brain_PTS11-704.null:R-454-SB119.NlaIII	1	-
chr11	37061903	37061904	3.MB-P-704-T-Brain_PTS11-704.null:R-454-SB119.NlaIII	2	-
chr11	37903245	37903246	3.MB-P-619-T-Brain_PTS11-619.L-454-SB049:R-454-SB145.NlaIII	1	+
chr11	37903349	37903350	3.MB-P-421-T-Brain_PTS11-421.null:R-454-SB111.NlaIII	1	+
chr11	37909168	37909169	3.MB-P-619-T-Brain_PTS11-619.L-454-SB049:R-454-SB145.NlaIII	2	-
chr11	38003666	38003667	4.MB-P-730-T-Brain_PTS11-730.L-454-SB046:R-454-SB142.NlaIII	1	+
chr11	38273899	38273900	3.MB-P-704-T-Brain_PTS11-704.null:R-454-SB119.NlaIII	1	-
chr11	38278766	38278767	3.MB-P-511-T-Brain_PTS11-511.L-454-SB025:R-454-SB121.NlaIII	1	-
chr11	38285647	38285648	1.MB-P-068-T-Brain_PTS11-068.LR-Barcode258-LR:LR-Barcode244-LR.NlaIII	2	-
chr11	38467581	38467582	3.MB-P-421-T-Brain_PTS11-421.null:R-454-SB111.NlaIII	1	+
chr11	38760397	38760398	3.MB-P-565-T-Brain_PTS11-565.L-454-SB033:R-454-SB129.NlaIII	1	-
chr11	3893217	3893218	3.MB-P-224-T-Brain_PTS11-224.null:R-454-SB103.NlaIII	1	+
chr11	39135632	39135633	3.MB-P-786-T-Brain_PTS11-786.L-454-SB042:R-454-SB138.NlaIII	2	+
chr11	39418153	39418154	3.MB-P-619-T-Brain_PTS11-619.L-454-SB049:R-454-SB145.NlaIII	1	-
chr11	39556109	39556110	1.MB-P-048-T-Brain_PTS11-048.LR-Barcode079-LR:LR-Barcode091-LR.NlaIII	1	+
chr11	41111517	41111518	3.MB-P-580-T-Brain_PTS11-580.L-454-SB041:R-454-SB137.NlaIII	1	+
chr11	41168120	41168121	3.MB-P-791-T-Brain_PTS11-791.L-454-SB050:R-454-SB146.NlaIII	1	+
chr11	4128094	4128095	1.MB-P-048-T-Brain_PTS11-048.LR-Barcode079-LR:LR-Barcode091-LR.BfaI.Freq=4|1.MB-P-048-T-Brain_PTS11-048.LR-Barcode079-LR:LR-Barcode091-LR.NlaIII.Freq=3.Merge	6	-
chr11	41343114	41343115	3.MB-P-224-T-Brain_PTS11-224.null:R-454-SB103.NlaIII	1	-
chr11	41367780	41367781	3.MB-P-224-T-Brain_PTS11-224.null:R-454-SB103.NlaIII	1	+
chr11	41627272	41627273	3.MB-P-580-T-Brain_PTS11-580.L-454-SB041:R-454-SB137.NlaIII	1	-
chr11	41651495	41651496	3.MB-P-791-T-Brain_PTS11-791.L-454-SB050:R-454-SB146.NlaIII	1	+
chr11	41748032	41748033	3.MB-P-791-T-Brain_PTS11-791.L-454-SB050:R-454-SB146.NlaIII	1	+
chr11	41802712	41802713	3.MB-P-580-T-Brain_PTS11-580.L-454-SB041:R-454-SB137.NlaIII	1	-
chr11	42046023	42046024	3.MB-P-540-T-Brain_PTS11-540.null:R-454-SB118.NlaIII	1	+
chr11	42873608	42873609	3.MB-P-580-T-Brain_PTS11-580.L-454-SB041:R-454-SB137.NlaIII	1	+
chr11	42900017	42900018	1.MB-P-146-T-Brain_PTS11-146.LR-Barcode230-LR:LR-Barcode258-LR.NlaIII	1	-
chr11	43526261	43526262	3.MB-P-457-T-Brain_PTS11-457.L-454-SB017:R-454-SB113.NlaIII	1	-
chr11	43679974	43679975	3.MB-P-793-T-Brain_PTS11-793.L-454-SB010:R-454-SB106.NlaIII	1	-
chr11	43974377	43974378	3.MB-P-791-T-Brain_PTS11-791.L-454-SB050:R-454-SB146.NlaIII	2	-
chr11	44148203	44148204	3.MB-P-224-T-Brain_PTS11-224.null:R-454-SB103.NlaIII	1	-
chr11	44498790	44498791	3.MB-P-286-T-Brain_PTS11-286.null:R-454-SB115.NlaIII	1	-
chr11	44523850	44523851	3.MB-P-386-T-Brain_PTS11-386.null:R-454-SB154.NlaIII	3	-
chr11	44656093	44656094	1.MB-P-048-T-Brain_PTS11-048.LR-Barcode079-LR:LR-Barcode091-LR.NlaIII	1	+
chr11	44754401	44754402	3.MB-P-524-T-Brain_PTS11-524.L-454-SB026:R-454-SB122.NlaIII	1	-
chr11	45206475	45206476	1.MB-P-048-T-Brain_PTS11-048.LR-Barcode079-LR:LR-Barcode091-LR.BfaI	1	+
chr11	45700274	45700275	3.MB-P-751-T-Brain_PTS11-751.null:R-454-SB127.NlaIII	1	+
chr11	46184960	46184961	3.MB-P-016-T-Brain_PTS11-016.L-454-SB001:R-454-SB097.NlaIII	1	-
chr11	46191382	46191383	1.MB-P-146-T-Brain_PTS11-146.LR-Barcode230-LR:LR-Barcode258-LR.NlaIII	1	-
chr11	4663123	4663124	3.MB-P-224-T-Brain_PTS11-224.null:R-454-SB103.NlaIII	1	+
chr11	46778196	46778197	3.MB-P-511-T-Brain_PTS11-511.L-454-SB025:R-454-SB121.NlaIII	2	+
chr11	46870239	46870240	3.MB-P-280-T-Brain_PTS11-280.null:R-454-SB107.NlaIII	2	-
chr11	47019534	47019535	3.MB-P-619-T-Brain_PTS11-619.L-454-SB049:R-454-SB145.NlaIII	2	+
chr11	47112348	47112349	3.MB-P-580-T-Brain_PTS11-580.L-454-SB041:R-454-SB137.NlaIII	1	+
chr11	47319171	47319172	3.MB-P-793-T-Brain_PTS11-793.L-454-SB010:R-454-SB106.NlaIII	1	+
chr11	47536641	47536642	3.MB-P-786-T-Brain_PTS11-786.L-454-SB042:R-454-SB138.NlaIII	1	+
chr11	4755646	4755647	1.MB-P-048-T-Brain_PTS11-048.LR-Barcode079-LR:LR-Barcode091-LR.BfaI	1	-
chr11	47569182	47569183	3.MB-P-524-T-Brain_PTS11-524.L-454-SB026:R-454-SB122.NlaIII	2	-
chr11	47621962	47621963	3.MB-P-580-T-Brain_PTS11-580.L-454-SB041:R-454-SB137.NlaIII	1	+
chr11	47700065	47700066	3.MB-P-580-T-Brain_PTS11-580.L-454-SB041:R-454-SB137.NlaIII	1	+
chr11	48994796	48994797	3.MB-P-565-T-Brain_PTS11-565.L-454-SB033:R-454-SB129.NlaIII	1	-
chr11	49105679	49105680	4.MB-P-730-T-Brain_PTS11-730.L-454-SB046:R-454-SB142.BfaI	17	+
chr11	49550486	49550487	6.MB-P-833-T-Brain_PTS11-833.L-454-SB057:R-454-SB153.NlaIII	1	-
chr11	49552044	49552045	3.MB-P-751-T-Brain_PTS11-751.null:R-454-SB127.NlaIII	1	+
chr11	49754528	49754529	3.MB-P-457-T-Brain_PTS11-457.L-454-SB017:R-454-SB113.NlaIII	3	+
chr11	49848458	49848459	3.MB-P-791-T-Brain_PTS11-791.L-454-SB050:R-454-SB146.NlaIII	1	+
chr11	49913389	49913390	3.MB-P-704-T-Brain_PTS11-704.null:R-454-SB119.NlaIII	1	-
chr11	49952803	49952804	4.MB-P-730-T-Brain_PTS11-730.L-454-SB046:R-454-SB142.NlaIII	10	-
chr11	50146999	50147000	3.MB-P-704-T-Brain_PTS11-704.null:R-454-SB119.NlaIII	1	+
chr11	50303405	50303406	3.MB-P-619-T-Brain_PTS11-619.L-454-SB049:R-454-SB145.NlaIII	1	+
chr11	50359365	50359366	3.MB-P-580-T-Brain_PTS11-580.L-454-SB041:R-454-SB137.NlaIII	10	-
chr11	50371875	50371876	1.MB-P-068-T-Brain_PTS11-068.LR-Barcode258-LR:LR-Barcode244-LR.NlaIII	1	-
chr11	50403673	50403674	3.MB-P-366-T-Brain_PTS11-366.null:R-454-SB131.NlaIII	2	+
chr11	50918375	50918376	1.MB-P-068-T-Brain_PTS11-068.LR-Barcode258-LR:LR-Barcode244-LR.NlaIII	1	+
chr11	5101361	5101362	3.MB-P-457-T-Brain_PTS11-457.L-454-SB017:R-454-SB113.NlaIII	1	-
chr11	51050716	51050717	3.MB-P-224-T-Brain_PTS11-224.null:R-454-SB103.NlaIII	1	+
chr11	51464177	51464178	1.MB-P-068-T-Brain_PTS11-068.LR-Barcode258-LR:LR-Barcode244-LR.BfaI	1	+
chr11	51640072	51640073	3.MB-P-524-T-Brain_PTS11-524.L-454-SB026:R-454-SB122.BfaI	1	+
chr11	52364908	52364909	3.MB-P-286-T-Brain_PTS11-286.null:R-454-SB115.NlaIII	1	-
chr11	53513041	53513042	3.MB-P-280-T-Brain_PTS11-280.null:R-454-SB107.NlaIII	1	-
chr11	53832237	53832238	1.MB-P-068-T-Brain_PTS11-068.LR-Barcode258-LR:LR-Barcode244-LR.BfaI	1	-
chr11	5386395	5386396	3.MB-P-704-T-Brain_PTS11-704.null:R-454-SB119.NlaIII	1	+
chr11	54094685	54094686	4.MB-P-730-T-Brain_PTS11-730.L-454-SB046:R-454-SB142.NlaIII	1	+
chr11	54203885	54203886	3.MB-P-421-T-Brain_PTS11-421.null:R-454-SB111.NlaIII	2	-
chr11	54283985	54283986	3.MB-P-849-T-Brain_PTS11-849.L-454-SB065:R-454-SB161.NlaIII	2	+
chr11	54475424	54475425	4.MB-P-730-T-Brain_PTS11-730.L-454-SB046:R-454-SB142.NlaIII	2	+
chr11	54814307	54814308	3.MB-P-704-T-Brain_PTS11-704.null:R-454-SB119.NlaIII.Merge	173	-
chr11	55048876	55048877	3.MB-P-540-T-Brain_PTS11-540.null:R-454-SB118.NlaIII	1	+
chr11	55079054	55079055	3.MB-P-704-T-Brain_PTS11-704.null:R-454-SB119.NlaIII	1	+
chr11	55176672	55176673	3.MB-P-280-T-Brain_PTS11-280.null:R-454-SB107.NlaIII	1	-
chr11	55193445	55193446	3.MB-P-580-T-Brain_PTS11-580.L-454-SB041:R-454-SB137.NlaIII	1	-
chr11	55301543	55301544	3.MB-P-704-T-Brain_PTS11-704.null:R-454-SB119.NlaIII	1	-
chr11	55414209	55414210	3.MB-P-704-T-Brain_PTS11-704.null:R-454-SB119.NlaIII	2	-
chr11	55916514	55916515	1.MB-P-146-T-Brain_PTS11-146.LR-Barcode230-LR:LR-Barcode258-LR.NlaIII	1	-
chr11	56321997	56321998	3.MB-P-116-T-Brain_PTS11-116.null:R-454-SB134.NlaIII	1	-
chr11	56913219	56913220	3.MB-P-PM98-T-Brain_PM-98.null:R-454-SB126.NlaIII	1	-
chr11	57508365	57508366	3.MB-P-457-T-Brain_PTS11-457.L-454-SB017:R-454-SB113.BfaI	1	+
chr11	57904438	57904439	8.MB-P-286-T-Brain_PTS11-286.L-454-SB190:null.BfaI	8	+
chr11	58682652	58682653	3.MB-P-849-T-Brain_PTS11-849.L-454-SB065:R-454-SB161.NlaIII	2	-
chr11	58806148	58806149	3.MB-P-224-T-Brain_PTS11-224.null:R-454-SB103.NlaIII	1	+
chr11	58901998	58901999	3.MB-P-540-T-Brain_PTS11-540.null:R-454-SB118.NlaIII	1	-
chr11	59798853	59798854	3.MB-P-224-T-Brain_PTS11-224.null:R-454-SB103.NlaIII	1	-
chr11	59832168	59832169	1.MB-P-068-T-Brain_PTS11-068.LR-Barcode258-LR:LR-Barcode244-LR.BfaI	2	-
chr11	59956119	59956120	4.MB-P-754-T-Brain_PTS11-754.L-454-SB054:R-454-SB150.BfaI	2	+
chr11	60344270	60344271	3.MB-P-224-T-Brain_PTS11-224.null:R-454-SB103.NlaIII	9	+
chr11	6068037	6068038	3.MB-P-849-T-Brain_PTS11-849.L-454-SB065:R-454-SB161.NlaIII	1	+
chr11	6074085	6074086	3.MB-P-116-T-Brain_PTS11-116.null:R-454-SB134.NlaIII	1	+
chr11	60975406	60975407	3.MB-P-849-T-Brain_PTS11-849.L-454-SB065:R-454-SB161.NlaIII	5	-
chr11	61215415	61215416	3.MB-P-849-T-Brain_PTS11-849.L-454-SB065:R-454-SB161.NlaIII	113	-
chr11	61260345	61260346	3.MB-P-849-T-Brain_PTS11-849.L-454-SB065:R-454-SB161.NlaIII	2	-
chr11	61309050	61309051	3.MB-P-849-T-Brain_PTS11-849.L-454-SB065:R-454-SB161.NlaIII	22	+
chr11	61335536	61335537	3.MB-P-849-T-Brain_PTS11-849.L-454-SB065:R-454-SB161.NlaIII	1	-
chr11	61386061	61386062	3.MB-P-849-T-Brain_PTS11-849.L-454-SB065:R-454-SB161.NlaIII	1	+
chr11	61534844	61534845	3.MB-P-704-T-Brain_PTS11-704.null:R-454-SB119.NlaIII	3	-
chr11	61558617	61558618	1.MB-P-068-T-Brain_PTS11-068.LR-Barcode258-LR:LR-Barcode244-LR.NlaIII	1	+
chr11	62105201	62105202	3.MB-P-849-T-Brain_PTS11-849.L-454-SB065:R-454-SB161.NlaIII	1	+
chr11	62370155	62370156	3.MB-P-540-T-Brain_PTS11-540.null:R-454-SB118.NlaIII	1	+
chr11	62396068	62396069	3.MB-P-421-T-Brain_PTS11-421.null:R-454-SB111.NlaIII	1	-
chr11	62406516	62406517	3.MB-P-849-T-Brain_PTS11-849.L-454-SB065:R-454-SB161.NlaIII	1	-
chr11	6254646	6254647	3.MB-P-421-T-Brain_PTS11-421.null:R-454-SB111.NlaIII	2	+
chr11	62708665	62708666	1.MB-P-146-T-Brain_PTS11-146.LR-Barcode230-LR:LR-Barcode258-LR.NlaIII	1	+
chr11	62764766	62764767	3.MB-P-016-T-Brain_PTS11-016.L-454-SB001:R-454-SB097.NlaIII	1	-
chr11	62931051	62931052	3.MB-P-793-T-Brain_PTS11-793.L-454-SB010:R-454-SB106.NlaIII	1	+
chr11	64020159	64020160	4.MB-P-730-T-Brain_PTS11-730.L-454-SB046:R-454-SB142.NlaIII	3	-
chr11	64266860	64266861	3.MB-P-580-T-Brain_PTS11-580.L-454-SB041:R-454-SB137.NlaIII	2	+
chr11	64442135	64442136	1.MB-P-068-T-Brain_PTS11-068.LR-Barcode258-LR:LR-Barcode244-LR.NlaIII	1	+
chr11	64490049	64490050	3.MB-P-849-T-Brain_PTS11-849.L-454-SB065:R-454-SB161.BfaI	1	-
chr11	64498573	64498574	3.MB-P-580-T-Brain_PTS11-580.L-454-SB041:R-454-SB137.NlaIII	1	+
chr11	64880376	64880377	3.MB-P-580-T-Brain_PTS11-580.L-454-SB041:R-454-SB137.NlaIII	2	+
chr11	65167756	65167757	1.MB-P-146-T-Brain_PTS11-146.LR-Barcode230-LR:LR-Barcode258-LR.BfaI	2	-
chr11	65245705	65245706	3.MB-P-565-T-Brain_PTS11-565.L-454-SB033:R-454-SB129.NlaIII	1	+
chr11	65599821	65599822	2.MB-P-386-T-Brain_PTS11-386.LR-Barcode095-LR:null.BfaI	2	-
chr11	65748512	65748513	3.MB-P-421-T-Brain_PTS11-421.null:R-454-SB111.NlaIII	2	-
chr11	65895266	65895267	3.MB-P-366-T-Brain_PTS11-366.null:R-454-SB131.NlaIII	1	+
chr11	66063372	66063373	3.MB-P-286-T-Brain_PTS11-286.null:R-454-SB115.NlaIII	1	-
chr11	66301264	66301265	3.MB-P-524-T-Brain_PTS11-524.L-454-SB026:R-454-SB122.NlaIII	1	-
chr11	66347393	66347394	3.MB-P-421-T-Brain_PTS11-421.null:R-454-SB111.NlaIII	1	-
chr11	66781447	66781448	3.MB-P-580-T-Brain_PTS11-580.L-454-SB041:R-454-SB137.NlaIII	1	+
chr11	67074377	67074378	3.MB-P-704-T-Brain_PTS11-704.null:R-454-SB119.NlaIII	1	+
chr11	67704464	67704465	3.MB-P-457-T-Brain_PTS11-457.L-454-SB017:R-454-SB113.NlaIII	1	-
chr11	68119005	68119006	3.MB-P-849-T-Brain_PTS11-849.L-454-SB065:R-454-SB161.NlaIII	2	+
chr11	68546356	68546357	3.MB-P-704-T-Brain_PTS11-704.null:R-454-SB119.NlaIII	1	-
chr11	68789035	68789036	4.MB-P-730-T-Brain_PTS11-730.L-454-SB046:R-454-SB142.BfaI	4	-
chr11	68963850	68963851	4.MB-P-730-T-Brain_PTS11-730.L-454-SB046:R-454-SB142.NlaIII	1	-
chr11	69433613	69433614	3.MB-P-224-T-Brain_PTS11-224.null:R-454-SB103.NlaIII	1	-
chr11	69608531	69608532	3.MB-P-849-T-Brain_PTS11-849.L-454-SB065:R-454-SB161.NlaIII	1	+
chr11	71294391	71294392	1.MB-P-068-T-Brain_PTS11-068.LR-Barcode258-LR:LR-Barcode244-LR.NlaIII	1	-
chr11	71387203	71387204	4.MB-P-730-T-Brain_PTS11-730.L-454-SB046:R-454-SB142.NlaIII	1	-
chr11	71390752	71390753	3.MB-P-778-T-Brain_PTS11-778.L-454-SB034:R-454-SB130.NlaIII	1	-
chr11	71467194	71467195	3.MB-P-421-T-Brain_PTS11-421.null:R-454-SB111.NlaIII	1	+
chr11	71512274	71512275	1.MB-P-068-T-Brain_PTS11-068.LR-Barcode258-LR:LR-Barcode244-LR.NlaIII	1	+
chr11	71680526	71680527	1.MB-P-008-T-Brain_PTS11-008.LR-Barcode077-LR:LR-Barcode089-LR.NlaIII	1	+
chr11	72137693	72137694	3.MB-P-580-T-Brain_PTS11-580.L-454-SB041:R-454-SB137.NlaIII	1	-
chr11	72464340	72464341	3.MB-P-580-T-Brain_PTS11-580.L-454-SB041:R-454-SB137.NlaIII	2	+
chr11	72664413	72664414	3.MB-P-580-T-Brain_PTS11-580.L-454-SB041:R-454-SB137.BfaI.Freq=3|3.MB-P-580-T-Brain_PTS11-580.L-454-SB041:R-454-SB137.NlaIII.Freq=2	3	+
chr11	72707384	72707385	3.MB-P-421-T-Brain_PTS11-421.null:R-454-SB111.NlaIII	1	-
chr11	72713934	72713935	3.MB-P-704-T-Brain_PTS11-704.null:R-454-SB119.NlaIII	1	+
chr11	72720039	72720040	3.MB-P-580-T-Brain_PTS11-580.L-454-SB041:R-454-SB137.BfaI	3	+
chr11	73004163	73004164	3.MB-P-580-T-Brain_PTS11-580.L-454-SB041:R-454-SB137.NlaIII	1	-
chr11	73050261	73050262	6.MB-P-260-T-Brain_PTS11-260.L-454-SB018:R-454-SB114.NlaIII	2	+
chr11	73190957	73190958	3.MB-P-793-T-Brain_PTS11-793.L-454-SB010:R-454-SB106.NlaIII	1	+
chr11	73265561	73265562	3.MB-P-704-T-Brain_PTS11-704.null:R-454-SB119.NlaIII	2	+
chr11	73270467	73270468	3.MB-P-704-T-Brain_PTS11-704.null:R-454-SB119.NlaIII	1	-
chr11	73290229	73290230	3.MB-P-421-T-Brain_PTS11-421.null:R-454-SB111.NlaIII	1	-
chr11	73638395	73638396	3.MB-P-016-T-Brain_PTS11-016.L-454-SB001:R-454-SB097.NlaIII	1	-
chr11	73862404	73862405	3.MB-P-704-T-Brain_PTS11-704.null:R-454-SB119.NlaIII	16	+
chr11	73863999	73864000	3.MB-P-704-T-Brain_PTS11-704.null:R-454-SB119.NlaIII	2	-
chr11	74105930	74105931	3.MB-P-580-T-Brain_PTS11-580.L-454-SB041:R-454-SB137.BfaI	6	+
chr11	74218734	74218735	1.MB-P-048-T-Brain_PTS11-048.LR-Barcode079-LR:LR-Barcode091-LR.NlaIII	1	+
chr11	74402729	74402730	3.MB-P-580-T-Brain_PTS11-580.L-454-SB041:R-454-SB137.NlaIII	1	-
chr11	74514298	74514299	3.MB-P-778-T-Brain_PTS11-778.L-454-SB034:R-454-SB130.NlaIII	1	-
chr11	74595885	74595886	1.MB-P-146-T-Brain_PTS11-146.LR-Barcode230-LR:LR-Barcode258-LR.NlaIII	1	-
chr11	74809914	74809915	3.MB-P-778-T-Brain_PTS11-778.L-454-SB034:R-454-SB130.BfaI	22	+
chr11	74862179	74862180	1.MB-P-146-T-Brain_PTS11-146.LR-Barcode230-LR:LR-Barcode258-LR.BfaI	1	+
chr11	75446666	75446667	3.MB-P-791-T-Brain_PTS11-791.L-454-SB050:R-454-SB146.NlaIII	2	-
chr11	75537243	75537244	1.MB-P-008-T-Brain_PTS11-008.LR-Barcode077-LR:LR-Barcode089-LR.BfaI	208	+
chr11	75562652	75562653	3.MB-P-540-T-Brain_PTS11-540.null:R-454-SB118.NlaIII	1	-
chr11	75572317	75572318	3.MB-P-793-T-Brain_PTS11-793.L-454-SB010:R-454-SB106.NlaIII	3	-
chr11	75574404	75574405	3.MB-P-365-T-Brain_PTS11-365.L-454-SB009:R-454-SB105.NlaIII	9	+
chr11	75985299	75985300	3.MB-P-524-T-Brain_PTS11-524.L-454-SB026:R-454-SB122.NlaIII	1	+
chr11	76082340	76082341	3.MB-P-786-T-Brain_PTS11-786.L-454-SB042:R-454-SB138.NlaIII	1	+
chr11	76176010	76176011	3.MB-P-224-T-Brain_PTS11-224.null:R-454-SB103.NlaIII	1	+
chr11	76515888	76515889	3.MB-P-793-T-Brain_PTS11-793.L-454-SB010:R-454-SB106.NlaIII	1	-
chr11	76821302	76821303	3.MB-P-016-T-Brain_PTS11-016.L-454-SB001:R-454-SB097.NlaIII	2	-
chr11	77100419	77100420	3.MB-P-704-T-Brain_PTS11-704.null:R-454-SB119.NlaIII	1	-
chr11	77383325	77383326	3.MB-P-016-T-Brain_PTS11-016.L-454-SB001:R-454-SB097.NlaIII	1	-
chr11	77649231	77649232	6.MB-P-883-T-Brain_PTS11-883.L-454-SB058:R-454-SB154.NlaIII	1	+
chr11	77808494	77808495	3.MB-P-540-T-Brain_PTS11-540.null:R-454-SB118.NlaIII	1	-
chr11	78456080	78456081	3.MB-P-580-T-Brain_PTS11-580.L-454-SB041:R-454-SB137.NlaIII	1	-
chr11	78874961	78874962	1.MB-P-048-T-Brain_PTS11-048.LR-Barcode079-LR:LR-Barcode091-LR.NlaIII	2	-
chr11	78950561	78950562	3.MB-P-704-T-Brain_PTS11-704.null:R-454-SB119.NlaIII	1	+
chr11	79234650	79234651	1.MB-P-048-T-Brain_PTS11-048.LR-Barcode079-LR:LR-Barcode091-LR.BfaI	1	+
chr11	79788396	79788397	1.MB-P-068-T-Brain_PTS11-068.LR-Barcode258-LR:LR-Barcode244-LR.BfaI	1	-
chr11	79835305	79835306	3.MB-P-580-T-Brain_PTS11-580.L-454-SB041:R-454-SB137.NlaIII	2	-
chr11	79843128	79843129	3.MB-P-731-T-Brain_PTS11-731.L-454-SB057:null.BfaI	4	+
chr11	79928977	79928978	4.MB-P-730-T-Brain_PTS11-730.L-454-SB046:R-454-SB142.NlaIII	1	+
chr11	80176326	80176327	1.MB-P-008-T-Brain_PTS11-008.LR-Barcode077-LR:LR-Barcode089-LR.BfaI	1	+
chr11	80211363	80211364	3.MB-P-791-T-Brain_PTS11-791.L-454-SB050:R-454-SB146.NlaIII	1	-
chr11	80688444	80688445	3.MB-P-365-T-Brain_PTS11-365.L-454-SB009:R-454-SB105.NlaIII	2	+
chr11	80931006	80931007	1.MB-P-048-T-Brain_PTS11-048.LR-Barcode079-LR:LR-Barcode091-LR.NlaIII	1	-
chr11	81088727	81088728	3.MB-P-704-T-Brain_PTS11-704.null:R-454-SB119.NlaIII	1	+
chr11	81139328	81139329	3.MB-P-793-T-Brain_PTS11-793.L-454-SB010:R-454-SB106.NlaIII	1	+
chr11	81544407	81544408	3.MB-P-224-T-Brain_PTS11-224.null:R-454-SB103.NlaIII	1	-
chr11	81934974	81934975	1.MB-P-068-T-Brain_PTS11-068.LR-Barcode258-LR:LR-Barcode244-LR.BfaI	2	-
chr11	8300678	8300679	3.MB-P-704-T-Brain_PTS11-704.null:R-454-SB119.NlaIII	1	-
chr11	83319454	83319455	3.MB-P-849-T-Brain_PTS11-849.L-454-SB065:R-454-SB161.NlaIII	3	+
chr11	83554473	83554474	1.MB-P-008-T-Brain_PTS11-008.LR-Barcode077-LR:LR-Barcode089-LR.BfaI	1	-
chr11	83959475	83959476	3.MB-P-224-T-Brain_PTS11-224.null:R-454-SB103.NlaIII	1	-
chr11	8418393	8418394	3.MB-P-016-T-Brain_PTS11-016.L-454-SB001:R-454-SB097.NlaIII	1	-
chr11	84290552	84290553	3.MB-P-365-T-Brain_PTS11-365.L-454-SB009:R-454-SB105.NlaIII	3	+
chr11	84294007	84294008	3.MB-P-580-T-Brain_PTS11-580.L-454-SB041:R-454-SB137.NlaIII	1	-
chr11	84363220	84363221	3.MB-P-457-T-Brain_PTS11-457.L-454-SB017:R-454-SB113.NlaIII	1	-
chr11	84475084	84475085	3.MB-P-849-T-Brain_PTS11-849.L-454-SB065:R-454-SB161.NlaIII	1	-
chr11	8488923	8488924	8.MB-P-704-T-Brain_PTS11-704.L-454-SB188:null.BfaI	13	+
chr11	85329539	85329540	1.MB-P-148-T-Brain_PTS11-148.LR-Barcode240-LR:LR-Barcode079-LR.BfaI	1	-
chr11	85499592	85499593	1.MB-P-008-T-Brain_PTS11-008.LR-Barcode077-LR:LR-Barcode089-LR.NlaIII	1	+
chr11	85678021	85678022	3.MB-P-791-T-Brain_PTS11-791.L-454-SB050:R-454-SB146.BfaI	21	-
chr11	85692109	85692110	6.MB-P-883-T-Brain_PTS11-883.L-454-SB058:R-454-SB154.NlaIII	1	+
chr11	86062049	86062050	3.MB-P-540-T-Brain_PTS11-540.null:R-454-SB118.NlaIII	1	+
chr11	86125716	86125717	1.MB-P-008-T-Brain_PTS11-008.LR-Barcode077-LR:LR-Barcode089-LR.BfaI	1	+
chr11	86128159	86128160	3.MB-P-540-T-Brain_PTS11-540.null:R-454-SB118.NlaIII	1	-
chr11	86162812	86162813	4.MB-P-730-T-Brain_PTS11-730.L-454-SB046:R-454-SB142.BfaI	1	+
chr11	86562565	86562566	3.MB-P-421-T-Brain_PTS11-421.null:R-454-SB111.NlaIII	1	-
chr11	86575084	86575085	1.MB-P-148-T-Brain_PTS11-148.LR-Barcode240-LR:LR-Barcode079-LR.NlaIII	5	+
chr11	86932797	86932798	3.MB-P-016-T-Brain_PTS11-016.L-454-SB001:R-454-SB097.NlaIII	2	+
chr11	87012880	87012881	3.MB-P-565-T-Brain_PTS11-565.L-454-SB033:R-454-SB129.NlaIII	1	-
chr11	87061024	87061025	3.MB-P-511-T-Brain_PTS11-511.L-454-SB025:R-454-SB121.NlaIII	1	+
chr11	87361538	87361539	1.MB-P-008-T-Brain_PTS11-008.LR-Barcode077-LR:LR-Barcode089-LR.NlaIII	1	+
chr11	87426749	87426750	1.MB-P-068-T-Brain_PTS11-068.LR-Barcode258-LR:LR-Barcode244-LR.BfaI	1	+
chr11	87598904	87598905	3.MB-P-619-T-Brain_PTS11-619.L-454-SB049:R-454-SB145.NlaIII	1	-
chr11	87827684	87827685	3.MB-P-540-T-Brain_PTS11-540.null:R-454-SB118.NlaIII	1	+
chr11	88042975	88042976	3.MB-P-704-T-Brain_PTS11-704.null:R-454-SB119.NlaIII	1	-
chr11	8850691	8850692	3.MB-P-704-T-Brain_PTS11-704.null:R-454-SB119.NlaIII	1	+
chr11	88575185	88575186	3.MB-P-751-T-Brain_PTS11-751.null:R-454-SB127.NlaIII	11	-
chr11	88745027	88745028	3.MB-P-540-T-Brain_PTS11-540.null:R-454-SB118.NlaIII	1	-
chr11	88792892	88792893	1.MB-P-068-T-Brain_PTS11-068.LR-Barcode258-LR:LR-Barcode244-LR.NlaIII	1	+
chr11	8949908	8949909	4.MB-P-730-T-Brain_PTS11-730.L-454-SB046:R-454-SB142.NlaIII	2	+
chr11	89637862	89637863	1.MB-P-146-T-Brain_PTS11-146.LR-Barcode230-LR:LR-Barcode258-LR.BfaI	4	-
chr11	89948762	89948763	4.MB-P-730-T-Brain_PTS11-730.L-454-SB046:R-454-SB142.NlaIII	1	-
chr11	90055706	90055707	3.MB-P-751-T-Brain_PTS11-751.null:R-454-SB127.NlaIII	2	-
chr11	90312760	90312761	3.MB-P-778-T-Brain_PTS11-778.L-454-SB034:R-454-SB130.NlaIII	2	-
chr11	90323215	90323216	3.MB-P-580-T-Brain_PTS11-580.L-454-SB041:R-454-SB137.NlaIII	1	+
chr11	90374728	90374729	1.MB-P-068-T-Brain_PTS11-068.LR-Barcode258-LR:LR-Barcode244-LR.NlaIII	2	+
chr11	90447986	90447987	1.MB-P-146-T-Brain_PTS11-146.LR-Barcode230-LR:LR-Barcode258-LR.NlaIII	1	+
chr11	90576005	90576006	4.MB-P-730-T-Brain_PTS11-730.L-454-SB046:R-454-SB142.NlaIII	1	+
chr11	90613627	90613628	3.MB-P-704-T-Brain_PTS11-704.null:R-454-SB119.NlaIII	2	+
chr11	91072861	91072862	6.MB-P-943-T-Brain_PTS11-943.L-454-SB002:R-454-SB098.BfaI	3	+
chr11	91354152	91354153	4.MB-P-730-T-Brain_PTS11-730.L-454-SB046:R-454-SB142.NlaIII	1	+
chr11	91377308	91377309	6.MB-P-835-T-Brain_PTS11-835.L-454-SB065:R-454-SB161.NlaIII	2	-
chr11	91457217	91457218	3.MB-P-580-T-Brain_PTS11-580.L-454-SB041:R-454-SB137.NlaIII	1	-
chr11	91598012	91598013	1.MB-P-068-T-Brain_PTS11-068.LR-Barcode258-LR:LR-Barcode244-LR.BfaI	2	+
chr11	91621059	91621060	1.MB-P-068-T-Brain_PTS11-068.LR-Barcode258-LR:LR-Barcode244-LR.BfaI.Freq=3|1.MB-P-068-T-Brain_PTS11-068.LR-Barcode258-LR:LR-Barcode244-LR.NlaIII.Freq=8	8	+
chr11	92114752	92114753	3.MB-P-619-T-Brain_PTS11-619.L-454-SB049:R-454-SB145.NlaIII	1	+
chr11	92332524	92332525	1.MB-P-146-T-Brain_PTS11-146.LR-Barcode230-LR:LR-Barcode258-LR.BfaI	1	+
chr11	93012904	93012905	1.MB-P-148-T-Brain_PTS11-148.LR-Barcode240-LR:LR-Barcode079-LR.NlaIII	1	-
chr11	93065162	93065163	1.MB-P-146-T-Brain_PTS11-146.LR-Barcode230-LR:LR-Barcode258-LR.BfaI	1	+
chr11	9341595	9341596	3.MB-P-580-T-Brain_PTS11-580.L-454-SB041:R-454-SB137.NlaIII	1	+
chr11	93548583	93548584	3.MB-P-366-T-Brain_PTS11-366.null:R-454-SB131.NlaIII	1	+
chr11	93741713	93741714	3.MB-P-793-T-Brain_PTS11-793.L-454-SB010:R-454-SB106.NlaIII	2	-
chr11	93913254	93913255	6.MB-P-833-T-Brain_PTS11-833.L-454-SB057:R-454-SB153.NlaIII	1	-
chr11	93924496	93924497	1.MB-P-048-T-Brain_PTS11-048.LR-Barcode079-LR:LR-Barcode091-LR.BfaI	1	-
chr11	94165436	94165437	3.MB-P-778-T-Brain_PTS11-778.L-454-SB034:R-454-SB130.BfaI.Freq=2|3.MB-P-778-T-Brain_PTS11-778.L-454-SB034:R-454-SB130.NlaIII.Freq=110	110	-
chr11	94632516	94632517	1.MB-P-068-T-Brain_PTS11-068.LR-Barcode258-LR:LR-Barcode244-LR.BfaI	1	-
chr11	95127664	95127665	3.MB-P-016-T-Brain_PTS11-016.L-454-SB001:R-454-SB097.NlaIII	1	+
chr11	95128813	95128814	3.MB-P-016-T-Brain_PTS11-016.L-454-SB001:R-454-SB097.NlaIII	1	+
chr11	95199751	95199752	3.MB-P-704-T-Brain_PTS11-704.null:R-454-SB119.NlaIII	2	+
chr11	9542232	9542233	3.MB-P-793-T-Brain_PTS11-793.L-454-SB010:R-454-SB106.NlaIII	1	-
chr11	95567984	95567985	3.MB-P-116-T-Brain_PTS11-116.null:R-454-SB134.NlaIII	2	-
chr11	95655669	95655670	3.MB-P-791-T-Brain_PTS11-791.L-454-SB050:R-454-SB146.NlaIII	2	-
chr11	95841261	95841262	3.MB-P-421-T-Brain_PTS11-421.null:R-454-SB111.NlaIII	6	-
chr11	9621358	9621359	1.MB-P-008-T-Brain_PTS11-008.LR-Barcode077-LR:LR-Barcode089-LR.BfaI	1	+
chr11	96307912	96307913	3.MB-P-619-T-Brain_PTS11-619.L-454-SB049:R-454-SB145.NlaIII	2	-
chr11	97151679	97151680	3.MB-P-224-T-Brain_PTS11-224.null:R-454-SB103.NlaIII	1	-
chr11	97225867	97225868	3.MB-P-524-T-Brain_PTS11-524.L-454-SB026:R-454-SB122.NlaIII	1	+
chr11	97449915	97449916	3.MB-P-224-T-Brain_PTS11-224.null:R-454-SB103.NlaIII	1	-
chr11	97535640	97535641	3.MB-P-540-T-Brain_PTS11-540.null:R-454-SB118.NlaIII	1	-
chr11	97765628	97765629	3.MB-P-366-T-Brain_PTS11-366.null:R-454-SB131.NlaIII	1	-
chr11	97828439	97828440	3.MB-P-016-T-Brain_PTS11-016.L-454-SB001:R-454-SB097.NlaIII	1	+
chr11	97895230	97895231	3.MB-P-386-T-Brain_PTS11-386.null:R-454-SB154.NlaIII	1	+
chr11	98175382	98175383	3.MB-P-457-T-Brain_PTS11-457.L-454-SB017:R-454-SB113.NlaIII	10	-
chr11	98237448	98237449	3.MB-P-457-T-Brain_PTS11-457.L-454-SB017:R-454-SB113.NlaIII	1	-
chr11	98292491	98292492	1.MB-P-048-T-Brain_PTS11-048.LR-Barcode079-LR:LR-Barcode091-LR.NlaIII	1	+
chr11	98584447	98584448	3.MB-P-016-T-Brain_PTS11-016.L-454-SB001:R-454-SB097.NlaIII	1	+
chr11	98681134	98681135	1.MB-P-048-T-Brain_PTS11-048.LR-Barcode079-LR:LR-Barcode091-LR.NlaIII	1	-
chr11	99389078	99389079	3.MB-P-PM98-T-Brain_PM-98.null:R-454-SB126.NlaIII	1	-
chr11	99422475	99422476	3.MB-P-849-T-Brain_PTS11-849.L-454-SB065:R-454-SB161.NlaIII	1	+
chr11	99464855	99464856	3.MB-P-366-T-Brain_PTS11-366.null:R-454-SB131.NlaIII	2	-
chr11	99588283	99588284	3.MB-P-704-T-Brain_PTS11-704.null:R-454-SB119.NlaIII	1	+
chr11	99590314	99590315	3.MB-P-704-T-Brain_PTS11-704.null:R-454-SB119.NlaIII	4	+
chr11	99843654	99843655	3.MB-P-793-T-Brain_PTS11-793.L-454-SB010:R-454-SB106.NlaIII	2	+
chr12	100047449	100047450	1.MB-P-068-T-Brain_PTS11-068.LR-Barcode258-LR:LR-Barcode244-LR.BfaI	1	+
chr12	100119492	100119493	3.MB-P-457-T-Brain_PTS11-457.L-454-SB017:R-454-SB113.NlaIII	1	+
chr12	100136952	100136953	3.MB-P-791-T-Brain_PTS11-791.L-454-SB050:R-454-SB146.NlaIII	1	-
chr12	100420013	100420014	3.MB-P-540-T-Brain_PTS11-540.null:R-454-SB118.NlaIII	1	+
chr12	100561939	100561940	3.MB-P-457-T-Brain_PTS11-457.L-454-SB017:R-454-SB113.NlaIII	1	-
chr12	100700298	100700299	4.MB-P-754-T-Brain_PTS11-754.L-454-SB054:R-454-SB150.BfaI	23	-
chr12	101022370	101022371	3.MB-P-365-T-Brain_PTS11-365.L-454-SB009:R-454-SB105.NlaIII	5	-
chr12	101245351	101245352	3.MB-P-540-T-Brain_PTS11-540.null:R-454-SB118.NlaIII	1	+
chr12	101249527	101249528	3.MB-P-540-T-Brain_PTS11-540.null:R-454-SB118.NlaIII	1	+
chr12	101562110	101562111	1.MB-P-048-T-Brain_PTS11-048.LR-Barcode079-LR:LR-Barcode091-LR.BfaI	1	-
chr12	101778297	101778298	6.MB-P-756-T-Brain_PTS11-756.L-454-SB042:R-454-SB138.NlaIII	1	-
chr12	102284379	102284380	3.MB-P-511-T-Brain_PTS11-511.L-454-SB025:R-454-SB121.NlaIII	2	+
chr12	102317400	102317401	3.MB-P-457-T-Brain_PTS11-457.L-454-SB017:R-454-SB113.NlaIII	1	+
chr12	10253924	10253925	3.MB-P-540-T-Brain_PTS11-540.null:R-454-SB118.NlaIII	1	+
chr12	103211637	103211638	1.MB-P-048-T-Brain_PTS11-048.LR-Barcode079-LR:LR-Barcode091-LR.NlaIII	2	+
chr12	103336221	103336222	3.MB-P-421-T-Brain_PTS11-421.null:R-454-SB111.NlaIII	1	+
chr12	104018813	104018814	1.MB-P-148-T-Brain_PTS11-148.LR-Barcode240-LR:LR-Barcode079-LR.BfaI	1	-
chr12	104191957	104191958	6.MB-P-260-T-Brain_PTS11-260.L-454-SB018:R-454-SB114.NlaIII	1	+
chr12	104249553	104249554	3.MB-P-778-T-Brain_PTS11-778.L-454-SB034:R-454-SB130.NlaIII	1	-
chr12	104781572	104781573	3.MB-P-366-T-Brain_PTS11-366.null:R-454-SB131.NlaIII	3	+
chr12	105243046	105243047	3.MB-P-511-T-Brain_PTS11-511.L-454-SB025:R-454-SB121.NlaIII	1	-
chr12	105266110	105266111	3.MB-P-580-T-Brain_PTS11-580.L-454-SB041:R-454-SB137.NlaIII	2	-
chr12	10543516	10543517	3.MB-P-540-T-Brain_PTS11-540.null:R-454-SB118.NlaIII	2	-
chr12	10615679	10615680	1.MB-P-068-T-Brain_PTS11-068.LR-Barcode258-LR:LR-Barcode244-LR.NlaIII	1	-
chr12	106365352	106365353	3.MB-P-224-T-Brain_PTS11-224.null:R-454-SB103.NlaIII	1	+
chr12	106557726	106557727	3.MB-P-PM98-T-Brain_PM-98.null:R-454-SB126.NlaIII	1	-
chr12	106674967	106674968	1.MB-P-008-T-Brain_PTS11-008.LR-Barcode077-LR:LR-Barcode089-LR.BfaI	1	-
chr12	106720479	106720480	3.MB-P-224-T-Brain_PTS11-224.null:R-454-SB103.NlaIII	1	+
chr12	106789215	106789216	3.MB-P-619-T-Brain_PTS11-619.L-454-SB049:R-454-SB145.NlaIII	1	-
chr12	107012717	107012718	1.MB-P-048-T-Brain_PTS11-048.LR-Barcode079-LR:LR-Barcode091-LR.BfaI	1	+
chr12	107044839	107044840	3.MB-P-704-T-Brain_PTS11-704.null:R-454-SB119.NlaIII	2	+
chr12	107048753	107048754	3.MB-P-421-T-Brain_PTS11-421.null:R-454-SB111.NlaIII	1	-
chr12	107233117	107233118	3.MB-P-224-T-Brain_PTS11-224.null:R-454-SB103.NlaIII	1	-
chr12	107263003	107263004	3.MB-P-751-T-Brain_PTS11-751.null:R-454-SB127.NlaIII	1	+
chr12	107393788	107393789	3.MB-P-016-T-Brain_PTS11-016.L-454-SB001:R-454-SB097.NlaIII	2	-
chr12	107862771	107862772	1.MB-P-048-T-Brain_PTS11-048.LR-Barcode079-LR:LR-Barcode091-LR.BfaI	1	+
chr12	107921514	107921515	3.MB-P-224-T-Brain_PTS11-224.null:R-454-SB103.NlaIII	1	+
chr12	108517347	108517348	3.MB-P-457-T-Brain_PTS11-457.L-454-SB017:R-454-SB113.NlaIII	1	-
chr12	108759259	108759260	6.MB-P-833-T-Brain_PTS11-833.L-454-SB057:R-454-SB153.NlaIII	1	+
chr12	108768689	108768690	6.MB-P-833-T-Brain_PTS11-833.L-454-SB057:R-454-SB153.BfaI	1	+
chr12	109206586	109206587	3.MB-P-365-T-Brain_PTS11-365.L-454-SB009:R-454-SB105.NlaIII	2	+
chr12	109814599	109814600	3.MB-P-524-T-Brain_PTS11-524.L-454-SB026:R-454-SB122.NlaIII	1	-
chr12	109864081	109864082	3.MB-P-457-T-Brain_PTS11-457.L-454-SB017:R-454-SB113.NlaIII	1	+
chr12	110958759	110958760	4.MB-P-730-T-Brain_PTS11-730.L-454-SB046:R-454-SB142.NlaIII	2	+
chr12	111003775	111003776	1.MB-P-068-T-Brain_PTS11-068.LR-Barcode258-LR:LR-Barcode244-LR.NlaIII	1	+
chr12	111046735	111046736	6.MB-P-349-T-Brain_PTS11-349.null:R-454-SB122.NlaIII	1	+
chr12	112105611	112105612	3.MB-P-116-T-Brain_PTS11-116.null:R-454-SB134.NlaIII	12	-
chr12	112324966	112324967	3.MB-P-224-T-Brain_PTS11-224.null:R-454-SB103.NlaIII	1	-
chr12	112868029	112868030	3.MB-P-580-T-Brain_PTS11-580.L-454-SB041:R-454-SB137.NlaIII	1	+
chr12	113029654	113029655	3.MB-P-704-T-Brain_PTS11-704.null:R-454-SB119.NlaIII	1	-
chr12	113097865	113097866	3.MB-P-286-T-Brain_PTS11-286.null:R-454-SB115.NlaIII	2	-
chr12	113464615	113464616	3.MB-P-791-T-Brain_PTS11-791.L-454-SB050:R-454-SB146.NlaIII	1	-
chr12	113475094	113475095	1.MB-P-068-T-Brain_PTS11-068.LR-Barcode258-LR:LR-Barcode244-LR.NlaIII	3	-
chr12	113694283	113694284	3.MB-P-786-T-Brain_PTS11-786.L-454-SB042:R-454-SB138.NlaIII	1	-
chr12	114163024	114163025	1.MB-P-146-T-Brain_PTS11-146.LR-Barcode230-LR:LR-Barcode258-LR.BfaI	1	+
chr12	114319258	114319259	1.MB-P-048-T-Brain_PTS11-048.LR-Barcode079-LR:LR-Barcode091-LR.NlaIII	1	+
chr12	115151886	115151887	3.MB-P-457-T-Brain_PTS11-457.L-454-SB017:R-454-SB113.NlaIII	1	+
chr12	115465636	115465637	3.MB-P-386-T-Brain_PTS11-386.null:R-454-SB154.NlaIII	1	+
chr12	115751373	115751374	3.MB-P-386-T-Brain_PTS11-386.null:R-454-SB154.NlaIII	1	-
chr12	116402859	116402860	3.MB-P-386-T-Brain_PTS11-386.null:R-454-SB154.NlaIII	153	+
chr12	116402870	116402871	3.MB-P-386-T-Brain_PTS11-386.null:R-454-SB154.NlaIII	1	+
chr12	116859010	116859011	2.MB-P-386-T-Brain_PTS11-386.LR-Barcode095-LR:null.BfaI	2	-
chr12	117830407	117830408	3.MB-P-PM98-T-Brain_PM-98.null:R-454-SB126.NlaIII	1	+
chr12	118058596	118058597	3.MB-P-540-T-Brain_PTS11-540.null:R-454-SB118.NlaIII	1	-
chr12	118423939	118423940	3.MB-P-793-T-Brain_PTS11-793.L-454-SB010:R-454-SB106.NlaIII	1	-
chr12	118660565	118660566	3.MB-P-793-T-Brain_PTS11-793.L-454-SB010:R-454-SB106.NlaIII	1	+
chr12	119144193	119144194	3.MB-P-386-T-Brain_PTS11-386.null:R-454-SB154.NlaIII	1	-
chr12	119566107	119566108	3.MB-P-565-T-Brain_PTS11-565.L-454-SB033:R-454-SB129.NlaIII	2	-
chr12	119866655	119866656	3.MB-P-116-T-Brain_PTS11-116.null:R-454-SB134.NlaIII	1	+
chr12	119955178	119955179	3.MB-P-849-T-Brain_PTS11-849.L-454-SB065:R-454-SB161.NlaIII	1	+
chr12	120105193	120105194	6.MB-P-260-T-Brain_PTS11-260.L-454-SB018:R-454-SB114.NlaIII	1	+
chr12	12023118	12023119	3.MB-P-791-T-Brain_PTS11-791.L-454-SB050:R-454-SB146.NlaIII	1	+
chr12	12036213	12036214	1.MB-P-048-T-Brain_PTS11-048.LR-Barcode079-LR:LR-Barcode091-LR.NlaIII	1	-
chr12	120433981	120433982	3.MB-P-793-T-Brain_PTS11-793.L-454-SB010:R-454-SB106.NlaIII	1	+
chr12	121235860	121235861	3.MB-P-421-T-Brain_PTS11-421.null:R-454-SB111.NlaIII	3	+
chr12	12139619	12139620	1.MB-P-008-T-Brain_PTS11-008.LR-Barcode077-LR:LR-Barcode089-LR.NlaIII	1	+
chr12	13149211	13149212	3.MB-P-540-T-Brain_PTS11-540.null:R-454-SB118.NlaIII	2	-
chr12	13230896	13230897	3.MB-P-619-T-Brain_PTS11-619.L-454-SB049:R-454-SB145.NlaIII	1	-
chr12	13582940	13582941	3.MB-P-791-T-Brain_PTS11-791.L-454-SB050:R-454-SB146.NlaIII	2	+
chr12	13594072	13594073	3.MB-P-791-T-Brain_PTS11-791.L-454-SB050:R-454-SB146.NlaIII	2	+
chr12	13636491	13636492	1.MB-P-146-T-Brain_PTS11-146.LR-Barcode230-LR:LR-Barcode258-LR.NlaIII	1	+
chr12	14048474	14048475	6.MB-P-835-T-Brain_PTS11-835.L-454-SB065:R-454-SB161.BfaI.Freq=11|6.MB-P-835-T-Brain_PTS11-835.L-454-SB065:R-454-SB161.NlaIII.Freq=7	11	-
chr12	14321723	14321724	3.MB-P-224-T-Brain_PTS11-224.null:R-454-SB103.NlaIII	1	-
chr12	14837652	14837653	3.MB-P-286-T-Brain_PTS11-286.null:R-454-SB115.NlaIII	1	+
chr12	15525044	15525045	1.MB-P-146-T-Brain_PTS11-146.LR-Barcode230-LR:LR-Barcode258-LR.BfaI	1	+
chr12	19098949	19098950	3.MB-P-791-T-Brain_PTS11-791.L-454-SB050:R-454-SB146.BfaI	57	+
chr12	21136119	21136120	4.MB-P-754-T-Brain_PTS11-754.L-454-SB054:R-454-SB150.NlaIII	1	-
chr12	21194067	21194068	3.MB-P-565-T-Brain_PTS11-565.L-454-SB033:R-454-SB129.NlaIII	1	-
chr12	21198780	21198781	1.MB-P-048-T-Brain_PTS11-048.LR-Barcode079-LR:LR-Barcode091-LR.NlaIII	1	-
chr12	21348626	21348627	3.MB-P-751-T-Brain_PTS11-751.null:R-454-SB127.NlaIII	2	+
chr12	25542376	25542377	6.MB-P-883-T-Brain_PTS11-883.L-454-SB058:R-454-SB154.BfaI.Freq=10|6.MB-P-883-T-Brain_PTS11-883.L-454-SB058:R-454-SB154.NlaIII.Freq=2	10	+
chr12	25760399	25760400	3.MB-P-224-T-Brain_PTS11-224.null:R-454-SB103.NlaIII	1	+
chr12	25978043	25978044	3.MB-P-751-T-Brain_PTS11-751.null:R-454-SB127.NlaIII	2	-
chr12	26727416	26727417	3.MB-P-016-T-Brain_PTS11-016.L-454-SB001:R-454-SB097.NlaIII	1	+
chr12	26858677	26858678	3.MB-P-751-T-Brain_PTS11-751.null:R-454-SB127.NlaIII	1	-
chr12	27297973	27297974	1.MB-P-048-T-Brain_PTS11-048.LR-Barcode079-LR:LR-Barcode091-LR.BfaI	1	+
chr12	27553061	27553062	3.MB-P-386-T-Brain_PTS11-386.null:R-454-SB154.NlaIII	1	-
chr12	27609027	27609028	3.MB-P-849-T-Brain_PTS11-849.L-454-SB065:R-454-SB161.NlaIII	4	-
chr12	27628700	27628701	3.MB-P-786-T-Brain_PTS11-786.L-454-SB042:R-454-SB138.NlaIII	2	+
chr12	27792091	27792092	3.MB-P-849-T-Brain_PTS11-849.L-454-SB065:R-454-SB161.NlaIII	1	+
chr12	28600201	28600202	3.MB-P-224-T-Brain_PTS11-224.null:R-454-SB103.NlaIII	1	+
chr12	29313756	29313757	3.MB-P-751-T-Brain_PTS11-751.null:R-454-SB127.NlaIII	1	-
chr12	30293478	30293479	3.MB-P-457-T-Brain_PTS11-457.L-454-SB017:R-454-SB113.NlaIII	1	+
chr12	30410858	30410859	3.MB-P-580-T-Brain_PTS11-580.L-454-SB041:R-454-SB137.NlaIII	1	-
chr12	30411171	30411172	3.MB-P-421-T-Brain_PTS11-421.null:R-454-SB111.NlaIII	1	+
chr12	30443875	30443876	6.MB-P-349-T-Brain_PTS11-349.null:R-454-SB122.NlaIII	5	-
chr12	30456612	30456613	3.MB-P-704-T-Brain_PTS11-704.null:R-454-SB119.NlaIII	2	+
chr12	30564368	30564369	3.MB-P-565-T-Brain_PTS11-565.L-454-SB033:R-454-SB129.NlaIII	1	+
chr12	30570119	30570120	3.MB-P-580-T-Brain_PTS11-580.L-454-SB041:R-454-SB137.NlaIII	1	+
chr12	30578421	30578422	4.MB-P-754-T-Brain_PTS11-754.L-454-SB054:R-454-SB150.NlaIII	1	+
chr12	30759731	30759732	3.MB-P-540-T-Brain_PTS11-540.null:R-454-SB118.NlaIII	1	-
chr12	30966096	30966097	3.MB-P-421-T-Brain_PTS11-421.null:R-454-SB111.NlaIII	1	+
chr12	3099969	3099970	3.MB-P-540-T-Brain_PTS11-540.null:R-454-SB118.NlaIII	1	+
chr12	31657724	31657725	3.MB-P-421-T-Brain_PTS11-421.null:R-454-SB111.NlaIII	1	+
chr12	31956304	31956305	3.MB-P-224-T-Brain_PTS11-224.null:R-454-SB103.NlaIII	1	+
chr12	32350243	32350244	1.MB-P-146-T-Brain_PTS11-146.LR-Barcode230-LR:LR-Barcode258-LR.BfaI	5	-
chr12	32407781	32407782	3.MB-P-540-T-Brain_PTS11-540.null:R-454-SB118.NlaIII	1	+
chr12	3248145	3248146	6.MB-P-260-T-Brain_PTS11-260.L-454-SB018:R-454-SB114.NlaIII	1	+
chr12	32516698	32516699	3.MB-P-421-T-Brain_PTS11-421.null:R-454-SB111.NlaIII	2	-
chr12	32867660	32867661	4.MB-P-730-T-Brain_PTS11-730.L-454-SB046:R-454-SB142.NlaIII	1	-
chr12	33253992	33253993	3.MB-P-421-T-Brain_PTS11-421.null:R-454-SB111.NlaIII	1	-
chr12	33629739	33629740	1.MB-P-048-T-Brain_PTS11-048.LR-Barcode079-LR:LR-Barcode091-LR.BfaI	1	-
chr12	33804900	33804901	6.MB-P-349-T-Brain_PTS11-349.null:R-454-SB122.NlaIII	1	-
chr12	3399368	3399369	3.MB-P-224-T-Brain_PTS11-224.null:R-454-SB103.NlaIII	1	-
chr12	34144538	34144539	3.MB-P-778-T-Brain_PTS11-778.L-454-SB034:R-454-SB130.NlaIII	3	+
chr12	34172326	34172327	3.MB-P-540-T-Brain_PTS11-540.null:R-454-SB118.NlaIII	1	-
chr12	35003730	35003731	3.MB-P-791-T-Brain_PTS11-791.L-454-SB050:R-454-SB146.NlaIII	5	+
chr12	35061075	35061076	1.MB-P-068-T-Brain_PTS11-068.LR-Barcode258-LR:LR-Barcode244-LR.NlaIII	2	+
chr12	35076167	35076168	3.MB-P-224-T-Brain_PTS11-224.null:R-454-SB103.NlaIII	1	+
chr12	35076805	35076806	3.MB-P-365-T-Brain_PTS11-365.L-454-SB009:R-454-SB105.NlaIII	1	+
chr12	35093907	35093908	1.MB-P-068-T-Brain_PTS11-068.LR-Barcode258-LR:LR-Barcode244-LR.NlaIII	7	+
chr12	35202611	35202612	3.MB-P-849-T-Brain_PTS11-849.L-454-SB065:R-454-SB161.NlaIII	1	-
chr12	35471588	35471589	6.MB-P-349-T-Brain_PTS11-349.null:R-454-SB122.NlaIII	1	-
chr12	36404041	36404042	3.MB-P-704-T-Brain_PTS11-704.null:R-454-SB119.NlaIII	1	+
chr12	36638243	36638244	3.MB-P-580-T-Brain_PTS11-580.L-454-SB041:R-454-SB137.NlaIII	1	+
chr12	37079599	37079600	3.MB-P-791-T-Brain_PTS11-791.L-454-SB050:R-454-SB146.NlaIII	1	-
chr12	37299389	37299390	1.MB-P-146-T-Brain_PTS11-146.LR-Barcode230-LR:LR-Barcode258-LR.NlaIII	1	-
chr12	37302257	37302258	3.MB-P-793-T-Brain_PTS11-793.L-454-SB010:R-454-SB106.NlaIII	1	+
chr12	37358600	37358601	4.MB-P-730-T-Brain_PTS11-730.L-454-SB046:R-454-SB142.NlaIII	1	+
chr12	37840002	37840003	3.MB-P-849-T-Brain_PTS11-849.L-454-SB065:R-454-SB161.NlaIII	1	+
chr12	37856204	37856205	6.MB-P-260-T-Brain_PTS11-260.L-454-SB018:R-454-SB114.NlaIII	1	-
chr12	37943607	37943608	3.MB-P-849-T-Brain_PTS11-849.L-454-SB065:R-454-SB161.NlaIII	2	-
chr12	37959490	37959491	1.MB-P-146-T-Brain_PTS11-146.LR-Barcode230-LR:LR-Barcode258-LR.BfaI	2	-
chr12	39421519	39421520	6.MB-P-756-T-Brain_PTS11-756.L-454-SB042:R-454-SB138.NlaIII	1	-
chr12	39499552	39499553	6.MB-P-756-T-Brain_PTS11-756.L-454-SB042:R-454-SB138.NlaIII	1	+
chr12	39652116	39652117	3.MB-P-580-T-Brain_PTS11-580.L-454-SB041:R-454-SB137.NlaIII	1	+
chr12	39838358	39838359	3.MB-P-751-T-Brain_PTS11-751.null:R-454-SB127.NlaIII	6	-
chr12	4090038	4090039	3.MB-P-457-T-Brain_PTS11-457.L-454-SB017:R-454-SB113.NlaIII	1	+
chr12	41065242	41065243	3.MB-P-457-T-Brain_PTS11-457.L-454-SB017:R-454-SB113.NlaIII	1	-
chr12	42182226	42182227	3.MB-P-791-T-Brain_PTS11-791.L-454-SB050:R-454-SB146.NlaIII	1	+
chr12	42897233	42897234	4.MB-P-730-T-Brain_PTS11-730.L-454-SB046:R-454-SB142.NlaIII	1	-
chr12	4299021	4299022	3.MB-P-366-T-Brain_PTS11-366.null:R-454-SB131.NlaIII	2	-
chr12	43234552	43234553	3.MB-P-280-T-Brain_PTS11-280.null:R-454-SB107.NlaIII	1	+
chr12	4338822	4338823	6.MB-P-349-T-Brain_PTS11-349.null:R-454-SB122.NlaIII	1	+
chr12	4345372	4345373	4.MB-P-730-T-Brain_PTS11-730.L-454-SB046:R-454-SB142.NlaIII	1	-
chr12	43709499	43709500	3.MB-P-751-T-Brain_PTS11-751.null:R-454-SB127.NlaIII	1	-
chr12	44152191	44152192	6.MB-P-756-T-Brain_PTS11-756.L-454-SB042:R-454-SB138.BfaI	3	+
chr12	44328665	44328666	3.MB-P-619-T-Brain_PTS11-619.L-454-SB049:R-454-SB145.NlaIII	1	-
chr12	44962893	44962894	3.MB-P-224-T-Brain_PTS11-224.null:R-454-SB103.NlaIII	1	-
chr12	45239298	45239299	3.MB-P-421-T-Brain_PTS11-421.null:R-454-SB111.NlaIII	1	+
chr12	45241686	45241687	3.MB-P-751-T-Brain_PTS11-751.null:R-454-SB127.NlaIII	1	-
chr12	45962884	45962885	6.MB-P-756-T-Brain_PTS11-756.L-454-SB042:R-454-SB138.NlaIII	1	+
chr12	46791018	46791019	1.MB-P-048-T-Brain_PTS11-048.LR-Barcode079-LR:LR-Barcode091-LR.NlaIII	1	+
chr12	47616468	47616469	1.MB-P-068-T-Brain_PTS11-068.LR-Barcode258-LR:LR-Barcode244-LR.NlaIII	1	-
chr12	47736820	47736821	8.MB-P-286-T-Brain_PTS11-286.L-454-SB190:null.BfaI	1	+
chr12	47811756	47811757	3.MB-P-524-T-Brain_PTS11-524.L-454-SB026:R-454-SB122.NlaIII	1	-
chr12	47908328	47908329	3.MB-P-457-T-Brain_PTS11-457.L-454-SB017:R-454-SB113.NlaIII	1	+
chr12	48314453	48314454	3.MB-P-365-T-Brain_PTS11-365.L-454-SB009:R-454-SB105.NlaIII	1	-
chr12	48372971	48372972	3.MB-P-751-T-Brain_PTS11-751.null:R-454-SB127.NlaIII	2	+
chr12	48638667	48638668	6.MB-P-756-T-Brain_PTS11-756.L-454-SB042:R-454-SB138.NlaIII	1	+
chr12	49061778	49061779	3.MB-P-511-T-Brain_PTS11-511.L-454-SB025:R-454-SB121.NlaIII	1	+
chr12	49170021	49170022	3.MB-P-751-T-Brain_PTS11-751.null:R-454-SB127.NlaIII	4	+
chr12	49206127	49206128	3.MB-P-791-T-Brain_PTS11-791.L-454-SB050:R-454-SB146.NlaIII	1	-
chr12	49408548	49408549	3.MB-P-751-T-Brain_PTS11-751.null:R-454-SB127.NlaIII	1	+
chr12	49511005	49511006	6.MB-P-756-T-Brain_PTS11-756.L-454-SB042:R-454-SB138.NlaIII	3	+
chr12	49598125	49598126	3.MB-P-751-T-Brain_PTS11-751.null:R-454-SB127.NlaIII	1	+
chr12	49649893	49649894	6.MB-P-756-T-Brain_PTS11-756.L-454-SB042:R-454-SB138.NlaIII	1	-
chr12	49719229	49719230	3.MB-P-421-T-Brain_PTS11-421.null:R-454-SB111.NlaIII	1	-
chr12	50046858	50046859	3.MB-P-280-T-Brain_PTS11-280.null:R-454-SB107.NlaIII	1	-
chr12	50067210	50067211	3.MB-P-540-T-Brain_PTS11-540.null:R-454-SB118.NlaIII	1	+
chr12	5050478	5050479	3.MB-P-224-T-Brain_PTS11-224.null:R-454-SB103.NlaIII	1	+
chr12	50725161	50725162	3.MB-P-386-T-Brain_PTS11-386.null:R-454-SB154.NlaIII	1	+
chr12	51579084	51579085	3.MB-P-751-T-Brain_PTS11-751.null:R-454-SB127.NlaIII	2	-
chr12	51580691	51580692	3.MB-P-751-T-Brain_PTS11-751.null:R-454-SB127.NlaIII	9	-
chr12	51700350	51700351	3.MB-P-540-T-Brain_PTS11-540.null:R-454-SB118.NlaIII	6	-
chr12	52049776	52049777	1.MB-P-146-T-Brain_PTS11-146.LR-Barcode230-LR:LR-Barcode258-LR.BfaI	1	-
chr12	52096113	52096114	6.MB-P-883-T-Brain_PTS11-883.L-454-SB058:R-454-SB154.NlaIII	1	-
chr12	52362486	52362487	3.MB-P-016-T-Brain_PTS11-016.L-454-SB001:R-454-SB097.NlaIII	1	-
chr12	52668396	52668397	1.MB-P-148-T-Brain_PTS11-148.LR-Barcode240-LR:LR-Barcode079-LR.NlaIII	1	-
chr12	52706489	52706490	3.MB-P-751-T-Brain_PTS11-751.null:R-454-SB127.NlaIII	4	+
chr12	52883541	52883542	1.MB-P-008-T-Brain_PTS11-008.LR-Barcode077-LR:LR-Barcode089-LR.NlaIII	1	+
chr12	53174550	53174551	3.MB-P-511-T-Brain_PTS11-511.L-454-SB025:R-454-SB121.NlaIII	1	-
chr12	53200527	53200528	3.MB-P-016-T-Brain_PTS11-016.L-454-SB001:R-454-SB097.NlaIII	1	+
chr12	5378151	5378152	4.MB-P-754-T-Brain_PTS11-754.L-454-SB054:R-454-SB150.NlaIII	1	-
chr12	53857727	53857728	3.MB-P-849-T-Brain_PTS11-849.L-454-SB065:R-454-SB161.NlaIII	1	+
chr12	53920246	53920247	6.MB-P-833-T-Brain_PTS11-833.L-454-SB057:R-454-SB153.NlaIII	1	-
chr12	54427528	54427529	3.MB-P-540-T-Brain_PTS11-540.null:R-454-SB118.NlaIII	3	+
chr12	54468562	54468563	3.MB-P-280-T-Brain_PTS11-280.null:R-454-SB107.NlaIII	3	-
chr12	54544272	54544273	3.MB-P-751-T-Brain_PTS11-751.null:R-454-SB127.NlaIII	1	+
chr12	54624285	54624286	3.MB-P-421-T-Brain_PTS11-421.null:R-454-SB111.NlaIII	1	-
chr12	54838168	54838169	3.MB-P-751-T-Brain_PTS11-751.null:R-454-SB127.NlaIII	1	-
chr12	55266474	55266475	3.MB-P-540-T-Brain_PTS11-540.null:R-454-SB118.NlaIII	1	-
chr12	55352710	55352711	3.MB-P-016-T-Brain_PTS11-016.L-454-SB001:R-454-SB097.NlaIII	1	+
chr12	5552477	5552478	3.MB-P-457-T-Brain_PTS11-457.L-454-SB017:R-454-SB113.NlaIII	1	-
chr12	55687768	55687769	1.MB-P-068-T-Brain_PTS11-068.LR-Barcode258-LR:LR-Barcode244-LR.NlaIII	1	-
chr12	5593226	5593227	4.MB-P-730-T-Brain_PTS11-730.L-454-SB046:R-454-SB142.NlaIII	1	+
chr12	55987523	55987524	3.MB-P-786-T-Brain_PTS11-786.L-454-SB042:R-454-SB138.NlaIII	1	-
chr12	56916938	56916939	1.MB-P-048-T-Brain_PTS11-048.LR-Barcode079-LR:LR-Barcode091-LR.NlaIII	1	+
chr12	57107308	57107309	3.MB-P-457-T-Brain_PTS11-457.L-454-SB017:R-454-SB113.NlaIII	1	+
chr12	57674035	57674036	3.MB-P-457-T-Brain_PTS11-457.L-454-SB017:R-454-SB113.NlaIII	1	-
chr12	58070131	58070132	1.MB-P-146-T-Brain_PTS11-146.LR-Barcode230-LR:LR-Barcode258-LR.BfaI	1	+
chr12	59170471	59170472	1.MB-P-146-T-Brain_PTS11-146.LR-Barcode230-LR:LR-Barcode258-LR.NlaIII	1	-
chr12	59189445	59189446	1.MB-P-048-T-Brain_PTS11-048.LR-Barcode079-LR:LR-Barcode091-LR.NlaIII	1	+
chr12	59280945	59280946	3.MB-P-224-T-Brain_PTS11-224.null:R-454-SB103.NlaIII	1	+
chr12	5977259	5977260	3.MB-P-540-T-Brain_PTS11-540.null:R-454-SB118.NlaIII	2	-
chr12	60216708	60216709	4.MB-P-730-T-Brain_PTS11-730.L-454-SB046:R-454-SB142.NlaIII	1	-
chr12	60806264	60806265	3.MB-P-524-T-Brain_PTS11-524.L-454-SB026:R-454-SB122.NlaIII	1	-
chr12	60874671	60874672	3.MB-P-580-T-Brain_PTS11-580.L-454-SB041:R-454-SB137.BfaI	8	-
chr12	60900399	60900400	3.MB-P-524-T-Brain_PTS11-524.L-454-SB026:R-454-SB122.NlaIII	1	+
chr12	61098511	61098512	3.MB-P-524-T-Brain_PTS11-524.L-454-SB026:R-454-SB122.BfaI	1	-
chr12	61410999	61411000	3.MB-P-751-T-Brain_PTS11-751.null:R-454-SB127.NlaIII	5	-
chr12	61620228	61620229	3.MB-P-793-T-Brain_PTS11-793.L-454-SB010:R-454-SB106.NlaIII	2	-
chr12	61650840	61650841	3.MB-P-511-T-Brain_PTS11-511.L-454-SB025:R-454-SB121.NlaIII	1	-
chr12	61755856	61755857	3.MB-P-580-T-Brain_PTS11-580.L-454-SB041:R-454-SB137.NlaIII	1	-
chr12	62239200	62239201	1.MB-P-148-T-Brain_PTS11-148.LR-Barcode240-LR:LR-Barcode079-LR.BfaI	1	+
chr12	62321695	62321696	3.MB-P-457-T-Brain_PTS11-457.L-454-SB017:R-454-SB113.NlaIII	1	-
chr12	62435810	62435811	3.MB-P-793-T-Brain_PTS11-793.L-454-SB010:R-454-SB106.NlaIII	1	+
chr12	6354140	6354141	3.MB-P-421-T-Brain_PTS11-421.null:R-454-SB111.NlaIII	2	-
chr12	63868608	63868609	8.MB-P-540-T-Brain_PTS11-540.L-454-SB194:null.BfaI	14	+
chr12	63871386	63871387	3.MB-P-540-T-Brain_PTS11-540.null:R-454-SB118.NlaIII	2	-
chr12	63909402	63909403	1.MB-P-048-T-Brain_PTS11-048.LR-Barcode079-LR:LR-Barcode091-LR.BfaI	2	+
chr12	63963532	63963533	3.MB-P-540-T-Brain_PTS11-540.null:R-454-SB118.NlaIII	5	-
chr12	64335636	64335637	1.MB-P-048-T-Brain_PTS11-048.LR-Barcode079-LR:LR-Barcode091-LR.BfaI	1	+
chr12	64356900	64356901	3.MB-P-457-T-Brain_PTS11-457.L-454-SB017:R-454-SB113.NlaIII	1	+
chr12	64640602	64640603	3.MB-P-016-T-Brain_PTS11-016.L-454-SB001:R-454-SB097.NlaIII	1	+
chr12	6471568	6471569	3.MB-P-540-T-Brain_PTS11-540.null:R-454-SB118.NlaIII	1	+
chr12	64949577	64949578	3.MB-P-457-T-Brain_PTS11-457.L-454-SB017:R-454-SB113.NlaIII	1	+
chr12	64980032	64980033	3.MB-P-540-T-Brain_PTS11-540.null:R-454-SB118.NlaIII	4	+
chr12	65143097	65143098	3.MB-P-791-T-Brain_PTS11-791.L-454-SB050:R-454-SB146.NlaIII	1	+
chr12	65326196	65326197	1.MB-P-048-T-Brain_PTS11-048.LR-Barcode079-LR:LR-Barcode091-LR.NlaIII	1	-
chr12	65326338	65326339	3.MB-P-386-T-Brain_PTS11-386.null:R-454-SB154.NlaIII	1	-
chr12	65422736	65422737	3.MB-P-457-T-Brain_PTS11-457.L-454-SB017:R-454-SB113.NlaIII	2	+
chr12	65427842	65427843	4.MB-P-754-T-Brain_PTS11-754.L-454-SB054:R-454-SB150.NlaIII	1	+
chr12	65931753	65931754	3.MB-P-540-T-Brain_PTS11-540.null:R-454-SB118.NlaIII	2	+
chr12	66228587	66228588	3.MB-P-457-T-Brain_PTS11-457.L-454-SB017:R-454-SB113.NlaIII	1	+
chr12	66705898	66705899	3.MB-P-457-T-Brain_PTS11-457.L-454-SB017:R-454-SB113.NlaIII	1	+
chr12	66716601	66716602	6.MB-P-260-T-Brain_PTS11-260.L-454-SB018:R-454-SB114.NlaIII	2	-
chr12	66821008	66821009	1.MB-P-048-T-Brain_PTS11-048.LR-Barcode079-LR:LR-Barcode091-LR.NlaIII	1	+
chr12	66924454	66924455	3.MB-P-457-T-Brain_PTS11-457.L-454-SB017:R-454-SB113.NlaIII	88	-
chr12	66947201	66947202	3.MB-P-457-T-Brain_PTS11-457.L-454-SB017:R-454-SB113.NlaIII	1	-
chr12	67026252	67026253	3.MB-P-457-T-Brain_PTS11-457.L-454-SB017:R-454-SB113.NlaIII	1	-
chr12	67042557	67042558	1.MB-P-146-T-Brain_PTS11-146.LR-Barcode230-LR:LR-Barcode258-LR.BfaI	1	+
chr12	67260304	67260305	4.MB-P-730-T-Brain_PTS11-730.L-454-SB046:R-454-SB142.NlaIII	1	+
chr12	67334323	67334324	3.MB-P-457-T-Brain_PTS11-457.L-454-SB017:R-454-SB113.NlaIII	1	-
chr12	67420218	67420219	6.MB-P-756-T-Brain_PTS11-756.L-454-SB042:R-454-SB138.NlaIII	2	+
chr12	67609915	67609916	3.MB-P-457-T-Brain_PTS11-457.L-454-SB017:R-454-SB113.NlaIII	1	+
chr12	67846465	67846466	3.MB-P-386-T-Brain_PTS11-386.null:R-454-SB154.NlaIII	1	+
chr12	67939734	67939735	6.MB-P-756-T-Brain_PTS11-756.L-454-SB042:R-454-SB138.NlaIII	1	-
chr12	68050666	68050667	3.MB-P-791-T-Brain_PTS11-791.L-454-SB050:R-454-SB146.NlaIII	1	-
chr12	68111717	68111718	3.MB-P-421-T-Brain_PTS11-421.null:R-454-SB111.NlaIII	1	+
chr12	68251598	68251599	3.MB-P-457-T-Brain_PTS11-457.L-454-SB017:R-454-SB113.NlaIII	1	+
chr12	68269091	68269092	3.MB-P-457-T-Brain_PTS11-457.L-454-SB017:R-454-SB113.NlaIII	1	+
chr12	68796350	68796351	3.MB-P-457-T-Brain_PTS11-457.L-454-SB017:R-454-SB113.NlaIII	1	+
chr12	69361813	69361814	3.MB-P-457-T-Brain_PTS11-457.L-454-SB017:R-454-SB113.NlaIII	2	+
chr12	69757606	69757607	3.MB-P-524-T-Brain_PTS11-524.L-454-SB026:R-454-SB122.NlaIII	2	+
chr12	69889963	69889964	4.MB-P-730-T-Brain_PTS11-730.L-454-SB046:R-454-SB142.NlaIII	1	-
chr12	70094958	70094959	3.MB-P-457-T-Brain_PTS11-457.L-454-SB017:R-454-SB113.NlaIII	1	+
chr12	70243215	70243216	3.MB-P-793-T-Brain_PTS11-793.L-454-SB010:R-454-SB106.NlaIII	1	+
chr12	70664727	70664728	1.MB-P-068-T-Brain_PTS11-068.LR-Barcode258-LR:LR-Barcode244-LR.BfaI	1	+
chr12	70718249	70718250	3.MB-P-791-T-Brain_PTS11-791.L-454-SB050:R-454-SB146.NlaIII	1	-
chr12	70914763	70914764	3.MB-P-365-T-Brain_PTS11-365.L-454-SB009:R-454-SB105.NlaIII	5	+
chr12	70942357	70942358	3.MB-P-540-T-Brain_PTS11-540.null:R-454-SB118.NlaIII	1	+
chr12	71032927	71032928	3.MB-P-366-T-Brain_PTS11-366.null:R-454-SB131.NlaIII	1	+
chr12	71089306	71089307	1.MB-P-146-T-Brain_PTS11-146.LR-Barcode230-LR:LR-Barcode258-LR.BfaI	1	+
chr12	71692451	71692452	3.MB-P-280-T-Brain_PTS11-280.null:R-454-SB107.NlaIII	1	+
chr12	71826265	71826266	4.MB-P-730-T-Brain_PTS11-730.L-454-SB046:R-454-SB142.NlaIII	2	-
chr12	72327445	72327446	3.MB-P-224-T-Brain_PTS11-224.null:R-454-SB103.NlaIII	2	+
chr12	72739327	72739328	6.MB-P-260-T-Brain_PTS11-260.L-454-SB018:R-454-SB114.NlaIII	1	+
chr12	72748753	72748754	3.MB-P-457-T-Brain_PTS11-457.L-454-SB017:R-454-SB113.NlaIII	1	+
chr12	72899341	72899342	3.MB-P-524-T-Brain_PTS11-524.L-454-SB026:R-454-SB122.BfaI	3	+
chr12	7328711	7328712	1.MB-P-146-T-Brain_PTS11-146.LR-Barcode230-LR:LR-Barcode258-LR.NlaIII	1	+
chr12	7329879	7329880	1.MB-P-146-T-Brain_PTS11-146.LR-Barcode230-LR:LR-Barcode258-LR.BfaI	1	+
chr12	74335866	74335867	1.MB-P-068-T-Brain_PTS11-068.LR-Barcode258-LR:LR-Barcode244-LR.BfaI	1	+
chr12	74847548	74847549	3.MB-P-PM98-T-Brain_PM-98.null:R-454-SB126.NlaIII	1	+
chr12	74977102	74977103	1.MB-P-146-T-Brain_PTS11-146.LR-Barcode230-LR:LR-Barcode258-LR.BfaI	1	-
chr12	75246259	75246260	3.MB-P-540-T-Brain_PTS11-540.null:R-454-SB118.NlaIII	2	-
chr12	75312239	75312240	1.MB-P-048-T-Brain_PTS11-048.LR-Barcode079-LR:LR-Barcode091-LR.BfaI	1	-
chr12	7543551	7543552	3.MB-P-511-T-Brain_PTS11-511.L-454-SB025:R-454-SB121.NlaIII	2	+
chr12	7548010	7548011	3.MB-P-457-T-Brain_PTS11-457.L-454-SB017:R-454-SB113.NlaIII	1	+
chr12	75503012	75503013	3.MB-P-224-T-Brain_PTS11-224.null:R-454-SB103.NlaIII	1	-
chr12	76152531	76152532	3.MB-P-731-T-Brain_PTS11-731.L-454-SB057:null.BfaI	1	+
chr12	76616810	76616811	3.MB-P-PM98-T-Brain_PM-98.null:R-454-SB126.NlaIII	1	+
chr12	7673402	7673403	3.MB-P-280-T-Brain_PTS11-280.null:R-454-SB107.NlaIII	1	+
chr12	76791592	76791593	4.MB-P-730-T-Brain_PTS11-730.L-454-SB046:R-454-SB142.NlaIII	1	+
chr12	77974590	77974591	3.MB-P-540-T-Brain_PTS11-540.null:R-454-SB118.NlaIII	2	+
chr12	78363567	78363568	6.MB-P-349-T-Brain_PTS11-349.null:R-454-SB122.NlaIII	1	-
chr12	78859668	78859669	1.MB-P-068-T-Brain_PTS11-068.LR-Barcode258-LR:LR-Barcode244-LR.NlaIII	1	+
chr12	78910941	78910942	6.MB-P-260-T-Brain_PTS11-260.L-454-SB018:R-454-SB114.NlaIII	1	+
chr12	79488375	79488376	1.MB-P-008-T-Brain_PTS11-008.LR-Barcode077-LR:LR-Barcode089-LR.NlaIII	1	-
chr12	79491806	79491807	3.MB-P-365-T-Brain_PTS11-365.L-454-SB009:R-454-SB105.NlaIII	2	-
chr12	79727517	79727518	3.MB-P-421-T-Brain_PTS11-421.null:R-454-SB111.NlaIII	1	-
chr12	79868691	79868692	3.MB-P-224-T-Brain_PTS11-224.null:R-454-SB103.NlaIII	1	-
chr12	80266794	80266795	3.MB-P-786-T-Brain_PTS11-786.L-454-SB042:R-454-SB138.NlaIII	1	-
chr12	80333333	80333334	3.MB-P-016-T-Brain_PTS11-016.L-454-SB001:R-454-SB097.NlaIII	1	+
chr12	80646759	80646760	3.MB-P-778-T-Brain_PTS11-778.L-454-SB034:R-454-SB130.NlaIII	1	+
chr12	80926308	80926309	3.MB-P-580-T-Brain_PTS11-580.L-454-SB041:R-454-SB137.NlaIII	1	-
chr12	81143237	81143238	4.MB-P-730-T-Brain_PTS11-730.L-454-SB046:R-454-SB142.BfaI	13	-
chr12	81154693	81154694	3.MB-P-786-T-Brain_PTS11-786.L-454-SB042:R-454-SB138.BfaI.Freq=27|3.MB-P-786-T-Brain_PTS11-786.L-454-SB042:R-454-SB138.NlaIII.Freq=49	49	-
chr12	81466769	81466770	3.MB-P-786-T-Brain_PTS11-786.L-454-SB042:R-454-SB138.BfaI	10	+
chr12	81513997	81513998	3.MB-P-016-T-Brain_PTS11-016.L-454-SB001:R-454-SB097.NlaIII	1	+
chr12	81645625	81645626	3.MB-P-778-T-Brain_PTS11-778.L-454-SB034:R-454-SB130.NlaIII	1	+
chr12	81651294	81651295	3.MB-P-580-T-Brain_PTS11-580.L-454-SB041:R-454-SB137.BfaI	2	-
chr12	81670098	81670099	3.MB-P-849-T-Brain_PTS11-849.L-454-SB065:R-454-SB161.NlaIII	1	-
chr12	81872414	81872415	3.MB-P-016-T-Brain_PTS11-016.L-454-SB001:R-454-SB097.BfaI	20	+
chr12	8187397	8187398	3.MB-P-793-T-Brain_PTS11-793.L-454-SB010:R-454-SB106.NlaIII	1	+
chr12	8202213	8202214	3.MB-P-540-T-Brain_PTS11-540.null:R-454-SB118.NlaIII	3	-
chr12	82153850	82153851	3.MB-P-224-T-Brain_PTS11-224.null:R-454-SB103.NlaIII	1	-
chr12	82471620	82471621	1.MB-P-048-T-Brain_PTS11-048.LR-Barcode079-LR:LR-Barcode091-LR.NlaIII	1	+
chr12	82515427	82515428	3.MB-P-224-T-Brain_PTS11-224.null:R-454-SB103.NlaIII	1	-
chr12	82628454	82628455	3.MB-P-511-T-Brain_PTS11-511.L-454-SB025:R-454-SB121.NlaIII	1	-
chr12	82739994	82739995	3.MB-P-793-T-Brain_PTS11-793.L-454-SB010:R-454-SB106.NlaIII	1	+
chr12	8278519	8278520	3.MB-P-540-T-Brain_PTS11-540.null:R-454-SB118.NlaIII	1	+
chr12	83227329	83227330	3.MB-P-511-T-Brain_PTS11-511.L-454-SB025:R-454-SB121.NlaIII	30	-
chr12	83409206	83409207	3.MB-P-421-T-Brain_PTS11-421.null:R-454-SB111.NlaIII	1	+
chr12	83445295	83445296	3.MB-P-751-T-Brain_PTS11-751.null:R-454-SB127.NlaIII	1	-
chr12	83504873	83504874	3.MB-P-511-T-Brain_PTS11-511.L-454-SB025:R-454-SB121.NlaIII	2	+
chr12	83617553	83617554	3.MB-P-224-T-Brain_PTS11-224.null:R-454-SB103.NlaIII	1	+
chr12	83694220	83694221	1.MB-P-048-T-Brain_PTS11-048.LR-Barcode079-LR:LR-Barcode091-LR.BfaI	2	+
chr12	83901260	83901261	1.MB-P-048-T-Brain_PTS11-048.LR-Barcode079-LR:LR-Barcode091-LR.NlaIII	1	+
chr12	84753010	84753011	3.MB-P-224-T-Brain_PTS11-224.null:R-454-SB103.NlaIII	1	-
chr12	84764661	84764662	3.MB-P-224-T-Brain_PTS11-224.null:R-454-SB103.NlaIII	1	+
chr12	84826874	84826875	3.MB-P-786-T-Brain_PTS11-786.L-454-SB042:R-454-SB138.NlaIII	1	-
chr12	85520210	85520211	1.MB-P-068-T-Brain_PTS11-068.LR-Barcode258-LR:LR-Barcode244-LR.NlaIII	1	-
chr12	85620804	85620805	3.MB-P-791-T-Brain_PTS11-791.L-454-SB050:R-454-SB146.NlaIII	1	+
chr12	86000649	86000650	1.MB-P-146-T-Brain_PTS11-146.LR-Barcode230-LR:LR-Barcode258-LR.NlaIII	4	-
chr12	86003487	86003488	1.MB-P-008-T-Brain_PTS11-008.LR-Barcode077-LR:LR-Barcode089-LR.NlaIII	1	-
chr12	86634873	86634874	3.MB-P-421-T-Brain_PTS11-421.null:R-454-SB111.NlaIII	2	+
chr12	8718108	8718109	3.MB-P-286-T-Brain_PTS11-286.null:R-454-SB115.NlaIII	1	+
chr12	87189562	87189563	3.MB-P-421-T-Brain_PTS11-421.null:R-454-SB111.NlaIII	1	-
chr12	8735292	8735293	3.MB-P-849-T-Brain_PTS11-849.L-454-SB065:R-454-SB161.NlaIII	1	+
chr12	87490656	87490657	3.MB-P-524-T-Brain_PTS11-524.L-454-SB026:R-454-SB122.NlaIII	1	+
chr12	87558733	87558734	3.MB-P-457-T-Brain_PTS11-457.L-454-SB017:R-454-SB113.BfaI	1	+
chr12	88252099	88252100	3.MB-P-751-T-Brain_PTS11-751.null:R-454-SB127.NlaIII	2	+
chr12	88417590	88417591	1.MB-P-148-T-Brain_PTS11-148.LR-Barcode240-LR:LR-Barcode079-LR.BfaI.Freq=34|1.MB-P-148-T-Brain_PTS11-148.LR-Barcode240-LR:LR-Barcode079-LR.NlaIII.Freq=95	95	+
chr12	90236295	90236296	1.MB-P-146-T-Brain_PTS11-146.LR-Barcode230-LR:LR-Barcode258-LR.NlaIII	3	+
chr12	9023686	9023687	1.MB-P-148-T-Brain_PTS11-148.LR-Barcode240-LR:LR-Barcode079-LR.BfaI	1	-
chr12	90311430	90311431	1.MB-P-048-T-Brain_PTS11-048.LR-Barcode079-LR:LR-Barcode091-LR.NlaIII	2	-
chr12	90323532	90323533	3.MB-P-778-T-Brain_PTS11-778.L-454-SB034:R-454-SB130.NlaIII	1	+
chr12	90503993	90503994	3.MB-P-457-T-Brain_PTS11-457.L-454-SB017:R-454-SB113.NlaIII	1	+
chr12	90976752	90976753	7.MB-P-288-T-Brain_PTS11-288.L-454-SB190:R-454-SB199.BfaI	1	+
chr12	91181277	91181278	1.MB-P-048-T-Brain_PTS11-048.LR-Barcode079-LR:LR-Barcode091-LR.BfaI	1	-
chr12	91493184	91493185	6.MB-P-943-T-Brain_PTS11-943.L-454-SB002:R-454-SB098.NlaIII	1	+
chr12	9206803	9206804	3.MB-P-386-T-Brain_PTS11-386.null:R-454-SB154.NlaIII	1	-
chr12	92208735	92208736	3.MB-P-751-T-Brain_PTS11-751.null:R-454-SB127.NlaIII	1	+
chr12	92816608	92816609	3.MB-P-457-T-Brain_PTS11-457.L-454-SB017:R-454-SB113.NlaIII	1	+
chr12	92826161	92826162	3.MB-P-619-T-Brain_PTS11-619.L-454-SB049:R-454-SB145.NlaIII	1	+
chr12	92962138	92962139	3.MB-P-704-T-Brain_PTS11-704.null:R-454-SB119.NlaIII	1	+
chr12	93400085	93400086	3.MB-P-791-T-Brain_PTS11-791.L-454-SB050:R-454-SB146.NlaIII	1	+
chr12	93418225	93418226	6.MB-P-756-T-Brain_PTS11-756.L-454-SB042:R-454-SB138.BfaI	2	+
chr12	93969916	93969917	3.MB-P-421-T-Brain_PTS11-421.null:R-454-SB111.NlaIII	1	+
chr12	94278284	94278285	3.MB-P-778-T-Brain_PTS11-778.L-454-SB034:R-454-SB130.NlaIII	2	+
chr12	94820144	94820145	3.MB-P-421-T-Brain_PTS11-421.null:R-454-SB111.NlaIII	1	+
chr12	95345782	95345783	3.MB-P-224-T-Brain_PTS11-224.null:R-454-SB103.NlaIII	1	-
chr12	95628293	95628294	3.MB-P-751-T-Brain_PTS11-751.null:R-454-SB127.NlaIII	2	+
chr12	96122440	96122441	3.MB-P-365-T-Brain_PTS11-365.L-454-SB009:R-454-SB105.NlaIII	2	-
chr12	96399143	96399144	3.MB-P-365-T-Brain_PTS11-365.L-454-SB009:R-454-SB105.NlaIII	4	-
chr12	96640095	96640096	3.MB-P-386-T-Brain_PTS11-386.null:R-454-SB154.NlaIII	1	+
chr12	96773363	96773364	6.MB-P-260-T-Brain_PTS11-260.L-454-SB018:R-454-SB114.NlaIII	1	+
chr12	96845701	96845702	3.MB-P-849-T-Brain_PTS11-849.L-454-SB065:R-454-SB161.BfaI	1	-
chr12	96891736	96891737	1.MB-P-146-T-Brain_PTS11-146.LR-Barcode230-LR:LR-Barcode258-LR.BfaI	1	+
chr12	97153334	97153335	3.MB-P-224-T-Brain_PTS11-224.null:R-454-SB103.NlaIII	1	-
chr12	97391177	97391178	3.MB-P-793-T-Brain_PTS11-793.L-454-SB010:R-454-SB106.NlaIII	1	-
chr12	9794051	9794052	3.MB-P-457-T-Brain_PTS11-457.L-454-SB017:R-454-SB113.NlaIII	1	-
chr12	97997387	97997388	3.MB-P-457-T-Brain_PTS11-457.L-454-SB017:R-454-SB113.NlaIII	2	+
chr12	98230037	98230038	3.MB-P-457-T-Brain_PTS11-457.L-454-SB017:R-454-SB113.NlaIII	1	+
chr12	99039519	99039520	3.MB-P-751-T-Brain_PTS11-751.null:R-454-SB127.NlaIII	2	-
chr12	9905829	9905830	3.MB-P-793-T-Brain_PTS11-793.L-454-SB010:R-454-SB106.NlaIII	1	+
chr12	9928242	9928243	3.MB-P-421-T-Brain_PTS11-421.null:R-454-SB111.NlaIII	1	+
chr12	99910821	99910822	1.MB-P-008-T-Brain_PTS11-008.LR-Barcode077-LR:LR-Barcode089-LR.BfaI	1	-
chr13	10021262	10021263	1.MB-P-008-T-Brain_PTS11-008.LR-Barcode077-LR:LR-Barcode089-LR.BfaI	1	+
chr13	100766022	100766023	7.MB-P-288-T-Brain_PTS11-288.L-454-SB190:R-454-SB199.BfaI	55	+
chr13	100863995	100863996	2.MB-P-386-T-Brain_PTS11-386.LR-Barcode095-LR:null.BfaI	1	-
chr13	100872298	100872299	3.MB-P-224-T-Brain_PTS11-224.null:R-454-SB103.NlaIII	1	+
chr13	100947865	100947866	1.MB-P-048-T-Brain_PTS11-048.LR-Barcode079-LR:LR-Barcode091-LR.NlaIII	1	+
chr13	100958717	100958718	3.MB-P-580-T-Brain_PTS11-580.L-454-SB041:R-454-SB137.NlaIII	1	+
chr13	101066120	101066121	3.MB-P-786-T-Brain_PTS11-786.L-454-SB042:R-454-SB138.NlaIII	3	+
chr13	101111932	101111933	1.MB-P-068-T-Brain_PTS11-068.LR-Barcode258-LR:LR-Barcode244-LR.NlaIII	1	-
chr13	101271167	101271168	1.MB-P-148-T-Brain_PTS11-148.LR-Barcode240-LR:LR-Barcode079-LR.NlaIII	1	-
chr13	101348297	101348298	1.MB-P-148-T-Brain_PTS11-148.LR-Barcode240-LR:LR-Barcode079-LR.NlaIII	1	+
chr13	101490785	101490786	3.MB-P-751-T-Brain_PTS11-751.null:R-454-SB127.NlaIII	1	+
chr13	101493723	101493724	1.MB-P-068-T-Brain_PTS11-068.LR-Barcode258-LR:LR-Barcode244-LR.NlaIII	1	-
chr13	101551740	101551741	3.MB-P-286-T-Brain_PTS11-286.null:R-454-SB115.NlaIII	2	+
chr13	102096164	102096165	3.MB-P-793-T-Brain_PTS11-793.L-454-SB010:R-454-SB106.NlaIII	1	-
chr13	102319940	102319941	3.MB-P-704-T-Brain_PTS11-704.null:R-454-SB119.NlaIII	1	+
chr13	102447433	102447434	3.MB-P-511-T-Brain_PTS11-511.L-454-SB025:R-454-SB121.NlaIII	1	-
chr13	102492136	102492137	3.MB-P-731-T-Brain_PTS11-731.L-454-SB057:null.BfaI	7	+
chr13	102767141	102767142	3.MB-P-793-T-Brain_PTS11-793.L-454-SB010:R-454-SB106.NlaIII	1	+
chr13	102791955	102791956	3.MB-P-457-T-Brain_PTS11-457.L-454-SB017:R-454-SB113.NlaIII	1	+
chr13	103007391	103007392	1.MB-P-048-T-Brain_PTS11-048.LR-Barcode079-LR:LR-Barcode091-LR.BfaI	1	-
chr13	103744937	103744938	3.MB-P-224-T-Brain_PTS11-224.null:R-454-SB103.NlaIII	20	-
chr13	103880440	103880441	3.MB-P-786-T-Brain_PTS11-786.L-454-SB042:R-454-SB138.NlaIII	2	-
chr13	103888415	103888416	1.MB-P-008-T-Brain_PTS11-008.LR-Barcode077-LR:LR-Barcode089-LR.NlaIII	1	-
chr13	10394447	10394448	3.MB-P-421-T-Brain_PTS11-421.null:R-454-SB111.NlaIII	1	-
chr13	103986257	103986258	3.MB-P-224-T-Brain_PTS11-224.null:R-454-SB103.NlaIII	1	+
chr13	104057640	104057641	3.MB-P-224-T-Brain_PTS11-224.null:R-454-SB103.NlaIII	1	-
chr13	104288813	104288814	1.MB-P-048-T-Brain_PTS11-048.LR-Barcode079-LR:LR-Barcode091-LR.BfaI	1	-
chr13	104289089	104289090	3.MB-P-280-T-Brain_PTS11-280.null:R-454-SB107.NlaIII	1	-
chr13	104297368	104297369	3.MB-P-280-T-Brain_PTS11-280.null:R-454-SB107.NlaIII	1	-
chr13	104536197	104536198	4.MB-P-730-T-Brain_PTS11-730.L-454-SB046:R-454-SB142.BfaI	21	-
chr13	104537448	104537449	1.MB-P-068-T-Brain_PTS11-068.LR-Barcode258-LR:LR-Barcode244-LR.NlaIII	38	+
chr13	104600027	104600028	4.MB-P-730-T-Brain_PTS11-730.L-454-SB046:R-454-SB142.NlaIII	1	+
chr13	104663532	104663533	1.MB-P-048-T-Brain_PTS11-048.LR-Barcode079-LR:LR-Barcode091-LR.BfaI	1	+
chr13	104678239	104678240	3.MB-P-224-T-Brain_PTS11-224.null:R-454-SB103.NlaIII	1	-
chr13	104825160	104825161	3.MB-P-791-T-Brain_PTS11-791.L-454-SB050:R-454-SB146.NlaIII	1	+
chr13	104998018	104998019	6.MB-P-349-T-Brain_PTS11-349.null:R-454-SB122.NlaIII	1	+
chr13	10515209	10515210	3.MB-P-791-T-Brain_PTS11-791.L-454-SB050:R-454-SB146.NlaIII	1	-
chr13	105202078	105202079	3.MB-P-751-T-Brain_PTS11-751.null:R-454-SB127.NlaIII	2	+
chr13	105519067	105519068	1.MB-P-146-T-Brain_PTS11-146.LR-Barcode230-LR:LR-Barcode258-LR.BfaI	1	+
chr13	105571302	105571303	1.MB-P-008-T-Brain_PTS11-008.LR-Barcode077-LR:LR-Barcode089-LR.BfaI	1	-
chr13	105630201	105630202	6.MB-P-349-T-Brain_PTS11-349.null:R-454-SB122.NlaIII	1	-
chr13	105631172	105631173	3.MB-P-366-T-Brain_PTS11-366.null:R-454-SB131.NlaIII	1	+
chr13	10573641	10573642	3.MB-P-224-T-Brain_PTS11-224.null:R-454-SB103.NlaIII	1	-
chr13	105862088	105862089	4.MB-P-730-T-Brain_PTS11-730.L-454-SB046:R-454-SB142.BfaI	26	-
chr13	105912207	105912208	3.MB-P-511-T-Brain_PTS11-511.L-454-SB025:R-454-SB121.NlaIII	2	+
chr13	106172547	106172548	1.MB-P-008-T-Brain_PTS11-008.LR-Barcode077-LR:LR-Barcode089-LR.BfaI	1	+
chr13	106193820	106193821	1.MB-P-048-T-Brain_PTS11-048.LR-Barcode079-LR:LR-Barcode091-LR.NlaIII	1	-
chr13	106199185	106199186	1.MB-P-008-T-Brain_PTS11-008.LR-Barcode077-LR:LR-Barcode089-LR.BfaI	2	+
chr13	106313637	106313638	3.MB-P-224-T-Brain_PTS11-224.null:R-454-SB103.NlaIII	1	-
chr13	106331697	106331698	1.MB-P-068-T-Brain_PTS11-068.LR-Barcode258-LR:LR-Barcode244-LR.NlaIII	2	-
chr13	106452623	106452624	1.MB-P-008-T-Brain_PTS11-008.LR-Barcode077-LR:LR-Barcode089-LR.NlaIII	2	-
chr13	106460964	106460965	1.MB-P-068-T-Brain_PTS11-068.LR-Barcode258-LR:LR-Barcode244-LR.BfaI.Freq=12|1.MB-P-068-T-Brain_PTS11-068.LR-Barcode258-LR:LR-Barcode244-LR.NlaIII.Freq=4	12	+
chr13	106488672	106488673	1.MB-P-068-T-Brain_PTS11-068.LR-Barcode258-LR:LR-Barcode244-LR.NlaIII	1	+
chr13	106633550	106633551	3.MB-P-791-T-Brain_PTS11-791.L-454-SB050:R-454-SB146.NlaIII	4	+
chr13	106962993	106962994	4.MB-P-730-T-Brain_PTS11-730.L-454-SB046:R-454-SB142.NlaIII	1	+
chr13	106965451	106965452	1.MB-P-008-T-Brain_PTS11-008.LR-Barcode077-LR:LR-Barcode089-LR.BfaI.Freq=1|1.MB-P-008-T-Brain_PTS11-008.LR-Barcode077-LR:LR-Barcode089-LR.NlaIII.Freq=10	10	+
chr13	107186458	107186459	1.MB-P-068-T-Brain_PTS11-068.LR-Barcode258-LR:LR-Barcode244-LR.NlaIII	1	+
chr13	107620060	107620061	3.MB-P-421-T-Brain_PTS11-421.null:R-454-SB111.NlaIII	1	-
chr13	107687916	107687917	3.MB-P-224-T-Brain_PTS11-224.null:R-454-SB103.NlaIII	1	+
chr13	107782319	107782320	3.MB-P-751-T-Brain_PTS11-751.null:R-454-SB127.NlaIII	3	-
chr13	108051600	108051601	3.MB-P-224-T-Brain_PTS11-224.null:R-454-SB103.NlaIII	1	+
chr13	108118573	108118574	1.MB-P-146-T-Brain_PTS11-146.LR-Barcode230-LR:LR-Barcode258-LR.BfaI	1	+
chr13	108229184	108229185	3.MB-P-280-T-Brain_PTS11-280.null:R-454-SB107.NlaIII	1	-
chr13	10845568	10845569	1.MB-P-146-T-Brain_PTS11-146.LR-Barcode230-LR:LR-Barcode258-LR.BfaI	1	+
chr13	108643501	108643502	8.MB-P-704-T-Brain_PTS11-704.L-454-SB188:null.BfaI.Freq=11|3.MB-P-704-T-Brain_PTS11-704.null:R-454-SB119.NlaIII.Freq=815	815	-
chr13	108645406	108645407	4.MB-P-730-T-Brain_PTS11-730.L-454-SB046:R-454-SB142.NlaIII	1	+
chr13	108753299	108753300	3.MB-P-224-T-Brain_PTS11-224.null:R-454-SB103.NlaIII	1	-
chr13	108775793	108775794	3.MB-P-457-T-Brain_PTS11-457.L-454-SB017:R-454-SB113.BfaI	20	-
chr13	108903495	108903496	1.MB-P-048-T-Brain_PTS11-048.LR-Barcode079-LR:LR-Barcode091-LR.NlaIII	1	+
chr13	108974150	108974151	3.MB-P-421-T-Brain_PTS11-421.null:R-454-SB111.NlaIII	1	-
chr13	109081970	109081971	6.MB-P-756-T-Brain_PTS11-756.L-454-SB042:R-454-SB138.NlaIII	1	+
chr13	109497003	109497004	3.MB-P-778-T-Brain_PTS11-778.L-454-SB034:R-454-SB130.NlaIII	1	-
chr13	109662859	109662860	3.MB-P-386-T-Brain_PTS11-386.null:R-454-SB154.NlaIII	1	-
chr13	110042586	110042587	1.MB-P-048-T-Brain_PTS11-048.LR-Barcode079-LR:LR-Barcode091-LR.NlaIII	1	-
chr13	110048785	110048786	1.MB-P-048-T-Brain_PTS11-048.LR-Barcode079-LR:LR-Barcode091-LR.BfaI	1	-
chr13	11023620	11023621	1.MB-P-008-T-Brain_PTS11-008.LR-Barcode077-LR:LR-Barcode089-LR.BfaI	1	-
chr13	110398743	110398744	3.MB-P-116-T-Brain_PTS11-116.null:R-454-SB134.NlaIII	1	+
chr13	110436727	110436728	1.MB-P-048-T-Brain_PTS11-048.LR-Barcode079-LR:LR-Barcode091-LR.NlaIII	1	-
chr13	110663154	110663155	3.MB-P-224-T-Brain_PTS11-224.null:R-454-SB103.NlaIII	1	-
chr13	110886101	110886102	3.MB-P-224-T-Brain_PTS11-224.null:R-454-SB103.NlaIII	3	+
chr13	110931126	110931127	1.MB-P-068-T-Brain_PTS11-068.LR-Barcode258-LR:LR-Barcode244-LR.NlaIII	1	-
chr13	110935153	110935154	3.MB-P-580-T-Brain_PTS11-580.L-454-SB041:R-454-SB137.BfaI	7	+
chr13	110998492	110998493	3.MB-P-786-T-Brain_PTS11-786.L-454-SB042:R-454-SB138.NlaIII	1	+
chr13	111028321	111028322	3.MB-P-786-T-Brain_PTS11-786.L-454-SB042:R-454-SB138.NlaIII	1	+
chr13	111041898	111041899	3.MB-P-791-T-Brain_PTS11-791.L-454-SB050:R-454-SB146.NlaIII	4	+
chr13	111136173	111136174	3.MB-P-224-T-Brain_PTS11-224.null:R-454-SB103.NlaIII	3	-
chr13	111171280	111171281	3.MB-P-751-T-Brain_PTS11-751.null:R-454-SB127.NlaIII	1	-
chr13	111305949	111305950	3.MB-P-849-T-Brain_PTS11-849.L-454-SB065:R-454-SB161.NlaIII	4	+
chr13	111495487	111495488	3.MB-P-511-T-Brain_PTS11-511.L-454-SB025:R-454-SB121.NlaIII	2	-
chr13	111825986	111825987	3.MB-P-224-T-Brain_PTS11-224.null:R-454-SB103.NlaIII	1	+
chr13	111889241	111889242	3.MB-P-791-T-Brain_PTS11-791.L-454-SB050:R-454-SB146.NlaIII	2	+
chr13	111897588	111897589	1.MB-P-146-T-Brain_PTS11-146.LR-Barcode230-LR:LR-Barcode258-LR.NlaIII	2	+
chr13	112071964	112071965	3.MB-P-224-T-Brain_PTS11-224.null:R-454-SB103.NlaIII	1	-
chr13	112201488	112201489	3.MB-P-786-T-Brain_PTS11-786.L-454-SB042:R-454-SB138.BfaI.Freq=7|3.MB-P-786-T-Brain_PTS11-786.L-454-SB042:R-454-SB138.NlaIII.Freq=59	59	+
chr13	112230423	112230424	3.MB-P-786-T-Brain_PTS11-786.L-454-SB042:R-454-SB138.NlaIII	1	+
chr13	112533900	112533901	4.MB-P-754-T-Brain_PTS11-754.L-454-SB054:R-454-SB150.NlaIII	1	+
chr13	112653064	112653065	3.MB-P-224-T-Brain_PTS11-224.null:R-454-SB103.NlaIII	1	+
chr13	112655418	112655419	3.MB-P-224-T-Brain_PTS11-224.null:R-454-SB103.NlaIII	2	-
chr13	112924100	112924101	3.MB-P-524-T-Brain_PTS11-524.L-454-SB026:R-454-SB122.NlaIII	1	-
chr13	113136046	113136047	3.MB-P-849-T-Brain_PTS11-849.L-454-SB065:R-454-SB161.NlaIII	2	-
chr13	113164012	113164013	3.MB-P-224-T-Brain_PTS11-224.null:R-454-SB103.NlaIII	1	-
chr13	113236298	113236299	6.MB-P-260-T-Brain_PTS11-260.L-454-SB018:R-454-SB114.NlaIII	1	+
chr13	113240027	113240028	3.MB-P-580-T-Brain_PTS11-580.L-454-SB041:R-454-SB137.NlaIII	1	+
chr13	113256585	113256586	3.MB-P-524-T-Brain_PTS11-524.L-454-SB026:R-454-SB122.NlaIII	2	+
chr13	113300128	113300129	3.MB-P-704-T-Brain_PTS11-704.null:R-454-SB119.NlaIII	1	+
chr13	113303022	113303023	3.MB-P-524-T-Brain_PTS11-524.L-454-SB026:R-454-SB122.NlaIII	1	-
chr13	113365425	113365426	3.MB-P-PM98-T-Brain_PM-98.null:R-454-SB126.NlaIII	1	-
chr13	113593783	113593784	1.MB-P-048-T-Brain_PTS11-048.LR-Barcode079-LR:LR-Barcode091-LR.NlaIII	1	+
chr13	113727622	113727623	3.MB-P-786-T-Brain_PTS11-786.L-454-SB042:R-454-SB138.NlaIII	1	+
chr13	114025354	114025355	3.MB-P-224-T-Brain_PTS11-224.null:R-454-SB103.NlaIII	1	-
chr13	11454169	11454170	3.MB-P-365-T-Brain_PTS11-365.L-454-SB009:R-454-SB105.NlaIII	1	-
chr13	114636580	114636581	1.MB-P-048-T-Brain_PTS11-048.LR-Barcode079-LR:LR-Barcode091-LR.NlaIII	1	-
chr13	114771730	114771731	3.MB-P-224-T-Brain_PTS11-224.null:R-454-SB103.NlaIII	1	+
chr13	115130877	115130878	6.MB-P-260-T-Brain_PTS11-260.L-454-SB018:R-454-SB114.NlaIII	1	+
chr13	115630428	115630429	3.MB-P-580-T-Brain_PTS11-580.L-454-SB041:R-454-SB137.NlaIII	1	-
chr13	115644795	115644796	1.MB-P-068-T-Brain_PTS11-068.LR-Barcode258-LR:LR-Barcode244-LR.NlaIII	1	-
chr13	115730466	115730467	3.MB-P-524-T-Brain_PTS11-524.L-454-SB026:R-454-SB122.NlaIII	2	-
chr13	115735026	115735027	3.MB-P-386-T-Brain_PTS11-386.null:R-454-SB154.NlaIII	1	+
chr13	115753171	115753172	3.MB-P-786-T-Brain_PTS11-786.L-454-SB042:R-454-SB138.NlaIII	1	-
chr13	115896567	115896568	3.MB-P-280-T-Brain_PTS11-280.null:R-454-SB107.NlaIII	2	-
chr13	11604705	11604706	1.MB-P-008-T-Brain_PTS11-008.LR-Barcode077-LR:LR-Barcode089-LR.NlaIII	1	-
chr13	116214277	116214278	3.MB-P-224-T-Brain_PTS11-224.null:R-454-SB103.NlaIII	1	-
chr13	116238220	116238221	3.MB-P-524-T-Brain_PTS11-524.L-454-SB026:R-454-SB122.NlaIII	1	+
chr13	116539629	116539630	3.MB-P-386-T-Brain_PTS11-386.null:R-454-SB154.NlaIII	1	-
chr13	116548040	116548041	3.MB-P-704-T-Brain_PTS11-704.null:R-454-SB119.NlaIII	1	+
chr13	116572405	116572406	6.MB-P-260-T-Brain_PTS11-260.L-454-SB018:R-454-SB114.NlaIII	1	-
chr13	116821862	116821863	3.MB-P-786-T-Brain_PTS11-786.L-454-SB042:R-454-SB138.BfaI	1	+
chr13	11748384	11748385	3.MB-P-224-T-Brain_PTS11-224.null:R-454-SB103.NlaIII	1	+
chr13	117680745	117680746	3.MB-P-524-T-Brain_PTS11-524.L-454-SB026:R-454-SB122.NlaIII	1	+
chr13	117855061	117855062	3.MB-P-751-T-Brain_PTS11-751.null:R-454-SB127.NlaIII	2	+
chr13	117941051	117941052	1.MB-P-068-T-Brain_PTS11-068.LR-Barcode258-LR:LR-Barcode244-LR.NlaIII	1	+
chr13	118235717	118235718	3.MB-P-849-T-Brain_PTS11-849.L-454-SB065:R-454-SB161.NlaIII	1	-
chr13	118387868	118387869	1.MB-P-048-T-Brain_PTS11-048.LR-Barcode079-LR:LR-Barcode091-LR.NlaIII	2	+
chr13	118427887	118427888	3.MB-P-PM98-T-Brain_PM-98.null:R-454-SB126.NlaIII	3	-
chr13	118481710	118481711	1.MB-P-008-T-Brain_PTS11-008.LR-Barcode077-LR:LR-Barcode089-LR.NlaIII	1	+
chr13	118497070	118497071	3.MB-P-224-T-Brain_PTS11-224.null:R-454-SB103.NlaIII	1	+
chr13	118501529	118501530	3.MB-P-793-T-Brain_PTS11-793.L-454-SB010:R-454-SB106.NlaIII	1	+
chr13	118566785	118566786	3.MB-P-421-T-Brain_PTS11-421.null:R-454-SB111.NlaIII	1	-
chr13	118667105	118667106	3.MB-P-791-T-Brain_PTS11-791.L-454-SB050:R-454-SB146.NlaIII	1	-
chr13	118715778	118715779	3.MB-P-849-T-Brain_PTS11-849.L-454-SB065:R-454-SB161.NlaIII	2	-
chr13	118981613	118981614	3.MB-P-786-T-Brain_PTS11-786.L-454-SB042:R-454-SB138.NlaIII	1	+
chr13	119151017	119151018	1.MB-P-068-T-Brain_PTS11-068.LR-Barcode258-LR:LR-Barcode244-LR.NlaIII	1	+
chr13	119187460	119187461	3.MB-P-224-T-Brain_PTS11-224.null:R-454-SB103.NlaIII	1	-
chr13	119492657	119492658	3.MB-P-540-T-Brain_PTS11-540.null:R-454-SB118.NlaIII	1	+
chr13	119568039	119568040	3.MB-P-786-T-Brain_PTS11-786.L-454-SB042:R-454-SB138.BfaI	23	-
chr13	119762681	119762682	1.MB-P-048-T-Brain_PTS11-048.LR-Barcode079-LR:LR-Barcode091-LR.NlaIII	2	+
chr13	119936963	119936964	3.MB-P-565-T-Brain_PTS11-565.L-454-SB033:R-454-SB129.NlaIII	2	+
chr13	119990213	119990214	4.MB-P-730-T-Brain_PTS11-730.L-454-SB046:R-454-SB142.NlaIII	1	-
chr13	12134374	12134375	1.MB-P-008-T-Brain_PTS11-008.LR-Barcode077-LR:LR-Barcode089-LR.NlaIII	1	-
chr13	12216988	12216989	3.MB-P-580-T-Brain_PTS11-580.L-454-SB041:R-454-SB137.NlaIII	1	-
chr13	12401902	12401903	1.MB-P-068-T-Brain_PTS11-068.LR-Barcode258-LR:LR-Barcode244-LR.BfaI	2	-
chr13	12439962	12439963	8.MB-P-286-T-Brain_PTS11-286.L-454-SB190:null.BfaI	16	-
chr13	12827467	12827468	6.MB-P-943-T-Brain_PTS11-943.L-454-SB002:R-454-SB098.NlaIII	1	+
chr13	13060319	13060320	1.MB-P-148-T-Brain_PTS11-148.LR-Barcode240-LR:LR-Barcode079-LR.NlaIII	1	+
chr13	13146713	13146714	1.MB-P-008-T-Brain_PTS11-008.LR-Barcode077-LR:LR-Barcode089-LR.NlaIII	1	-
chr13	13589150	13589151	3.MB-P-791-T-Brain_PTS11-791.L-454-SB050:R-454-SB146.NlaIII	1	+
chr13	13622390	13622391	3.MB-P-421-T-Brain_PTS11-421.null:R-454-SB111.NlaIII	1	-
chr13	13686981	13686982	1.MB-P-068-T-Brain_PTS11-068.LR-Barcode258-LR:LR-Barcode244-LR.NlaIII	1	+
chr13	13738417	13738418	1.MB-P-068-T-Brain_PTS11-068.LR-Barcode258-LR:LR-Barcode244-LR.BfaI	1	-
chr13	13820893	13820894	3.MB-P-704-T-Brain_PTS11-704.null:R-454-SB119.NlaIII	1	-
chr13	13821472	13821473	3.MB-P-704-T-Brain_PTS11-704.null:R-454-SB119.NlaIII	4	-
chr13	13856501	13856502	1.MB-P-068-T-Brain_PTS11-068.LR-Barcode258-LR:LR-Barcode244-LR.NlaIII	38	+
chr13	13858550	13858551	1.MB-P-068-T-Brain_PTS11-068.LR-Barcode258-LR:LR-Barcode244-LR.NlaIII	1	-
chr13	14077579	14077580	1.MB-P-068-T-Brain_PTS11-068.LR-Barcode258-LR:LR-Barcode244-LR.NlaIII	1	-
chr13	14159806	14159807	3.MB-P-224-T-Brain_PTS11-224.null:R-454-SB103.NlaIII	1	+
chr13	14211233	14211234	1.MB-P-048-T-Brain_PTS11-048.LR-Barcode079-LR:LR-Barcode091-LR.BfaI	1	-
chr13	14228096	14228097	1.MB-P-068-T-Brain_PTS11-068.LR-Barcode258-LR:LR-Barcode244-LR.BfaI	1	+
chr13	14421508	14421509	3.MB-P-386-T-Brain_PTS11-386.null:R-454-SB154.NlaIII	1	-
chr13	14686187	14686188	3.MB-P-224-T-Brain_PTS11-224.null:R-454-SB103.NlaIII	2	+
chr13	15093430	15093431	1.MB-P-068-T-Brain_PTS11-068.LR-Barcode258-LR:LR-Barcode244-LR.NlaIII	1	-
chr13	15274368	15274369	3.MB-P-224-T-Brain_PTS11-224.null:R-454-SB103.NlaIII	1	+
chr13	15510722	15510723	1.MB-P-008-T-Brain_PTS11-008.LR-Barcode077-LR:LR-Barcode089-LR.NlaIII	1	-
chr13	15589006	15589007	4.MB-P-730-T-Brain_PTS11-730.L-454-SB046:R-454-SB142.NlaIII	1	+
chr13	15616931	15616932	3.MB-P-511-T-Brain_PTS11-511.L-454-SB025:R-454-SB121.BfaI.Freq=1|3.MB-P-511-T-Brain_PTS11-511.L-454-SB025:R-454-SB121.NlaIII.Freq=3	3	+
chr13	15714690	15714691	1.MB-P-068-T-Brain_PTS11-068.LR-Barcode258-LR:LR-Barcode244-LR.NlaIII	7	+
chr13	15715349	15715350	3.MB-P-280-T-Brain_PTS11-280.null:R-454-SB107.NlaIII	1	+
chr13	15728721	15728722	1.MB-P-068-T-Brain_PTS11-068.LR-Barcode258-LR:LR-Barcode244-LR.NlaIII	6	+
chr13	15734037	15734038	3.MB-P-PM98-T-Brain_PM-98.null:R-454-SB126.NlaIII	1	+
chr13	15799613	15799614	1.MB-P-146-T-Brain_PTS11-146.LR-Barcode230-LR:LR-Barcode258-LR.NlaIII	2	+
chr13	15898925	15898926	3.MB-P-580-T-Brain_PTS11-580.L-454-SB041:R-454-SB137.NlaIII	1	-
chr13	16084055	16084056	1.MB-P-068-T-Brain_PTS11-068.LR-Barcode258-LR:LR-Barcode244-LR.NlaIII	1	+
chr13	16205834	16205835	6.MB-P-260-T-Brain_PTS11-260.L-454-SB018:R-454-SB114.NlaIII	1	-
chr13	16216421	16216422	1.MB-P-048-T-Brain_PTS11-048.LR-Barcode079-LR:LR-Barcode091-LR.BfaI.Freq=2|1.MB-P-048-T-Brain_PTS11-048.LR-Barcode079-LR:LR-Barcode091-LR.NlaIII.Freq=1	2	-
chr13	16241796	16241797	1.MB-P-008-T-Brain_PTS11-008.LR-Barcode077-LR:LR-Barcode089-LR.NlaIII	5	-
chr13	16362605	16362606	3.MB-P-793-T-Brain_PTS11-793.L-454-SB010:R-454-SB106.NlaIII	1	+
chr13	16457317	16457318	3.MB-P-280-T-Brain_PTS11-280.null:R-454-SB107.NlaIII	1	+
chr13	16476852	16476853	1.MB-P-068-T-Brain_PTS11-068.LR-Barcode258-LR:LR-Barcode244-LR.BfaI	1	+
chr13	16840858	16840859	3.MB-P-791-T-Brain_PTS11-791.L-454-SB050:R-454-SB146.NlaIII	2	+
chr13	16890749	16890750	3.MB-P-280-T-Brain_PTS11-280.null:R-454-SB107.NlaIII	1	-
chr13	16893238	16893239	3.MB-P-280-T-Brain_PTS11-280.null:R-454-SB107.NlaIII	1	+
chr13	17055638	17055639	3.MB-P-224-T-Brain_PTS11-224.null:R-454-SB103.NlaIII	6	+
chr13	17559638	17559639	3.MB-P-PM98-T-Brain_PM-98.null:R-454-SB126.NlaIII	1	-
chr13	17637044	17637045	1.MB-P-008-T-Brain_PTS11-008.LR-Barcode077-LR:LR-Barcode089-LR.BfaI	2	+
chr13	17642777	17642778	1.MB-P-008-T-Brain_PTS11-008.LR-Barcode077-LR:LR-Barcode089-LR.NlaIII	1	-
chr13	17892937	17892938	1.MB-P-008-T-Brain_PTS11-008.LR-Barcode077-LR:LR-Barcode089-LR.NlaIII	1	+
chr13	17940815	17940816	1.MB-P-068-T-Brain_PTS11-068.LR-Barcode258-LR:LR-Barcode244-LR.NlaIII	1	+
chr13	18281711	18281712	3.MB-P-224-T-Brain_PTS11-224.null:R-454-SB103.NlaIII	2	-
chr13	18374075	18374076	3.MB-P-224-T-Brain_PTS11-224.null:R-454-SB103.NlaIII	2	+
chr13	18578495	18578496	3.MB-P-793-T-Brain_PTS11-793.L-454-SB010:R-454-SB106.NlaIII	1	-
chr13	18696496	18696497	3.MB-P-791-T-Brain_PTS11-791.L-454-SB050:R-454-SB146.NlaIII	1	+
chr13	18716966	18716967	3.MB-P-778-T-Brain_PTS11-778.L-454-SB034:R-454-SB130.NlaIII	1	-
chr13	18847722	18847723	3.MB-P-791-T-Brain_PTS11-791.L-454-SB050:R-454-SB146.NlaIII	2	-
chr13	18888011	18888012	3.MB-P-524-T-Brain_PTS11-524.L-454-SB026:R-454-SB122.NlaIII	1	-
chr13	18889076	18889077	3.MB-P-421-T-Brain_PTS11-421.null:R-454-SB111.NlaIII	2	-
chr13	19131260	19131261	3.MB-P-791-T-Brain_PTS11-791.L-454-SB050:R-454-SB146.NlaIII	1	+
chr13	19136875	19136876	6.MB-P-756-T-Brain_PTS11-756.L-454-SB042:R-454-SB138.NlaIII	2	-
chr13	19143291	19143292	3.MB-P-016-T-Brain_PTS11-016.L-454-SB001:R-454-SB097.NlaIII	1	+
chr13	19193946	19193947	1.MB-P-146-T-Brain_PTS11-146.LR-Barcode230-LR:LR-Barcode258-LR.NlaIII	1	-
chr13	19302163	19302164	3.MB-P-457-T-Brain_PTS11-457.L-454-SB017:R-454-SB113.BfaI	1	+
chr13	19480626	19480627	3.MB-P-224-T-Brain_PTS11-224.null:R-454-SB103.NlaIII	1	-
chr13	19608796	19608797	3.MB-P-224-T-Brain_PTS11-224.null:R-454-SB103.NlaIII	1	-
chr13	19661880	19661881	3.MB-P-224-T-Brain_PTS11-224.null:R-454-SB103.NlaIII	2	-
chr13	19715709	19715710	3.MB-P-224-T-Brain_PTS11-224.null:R-454-SB103.NlaIII	1	+
chr13	19737711	19737712	8.MB-P-224-T-Brain_PTS11-224.L-454-SB191:null.BfaI	3	+
chr13	19988778	19988779	3.MB-P-457-T-Brain_PTS11-457.L-454-SB017:R-454-SB113.NlaIII	1	+
chr13	20071368	20071369	1.MB-P-008-T-Brain_PTS11-008.LR-Barcode077-LR:LR-Barcode089-LR.NlaIII	8	+
chr13	20210158	20210159	3.MB-P-565-T-Brain_PTS11-565.L-454-SB033:R-454-SB129.NlaIII	1	+
chr13	20470268	20470269	1.MB-P-008-T-Brain_PTS11-008.LR-Barcode077-LR:LR-Barcode089-LR.BfaI	2	-
chr13	21137249	21137250	3.MB-P-PM98-T-Brain_PM-98.null:R-454-SB126.NlaIII	1	+
chr13	21396922	21396923	8.MB-P-224-T-Brain_PTS11-224.L-454-SB191:null.BfaI.Freq=6|3.MB-P-224-T-Brain_PTS11-224.null:R-454-SB103.NlaIII.Freq=17	17	-
chr13	21543355	21543356	1.MB-P-048-T-Brain_PTS11-048.LR-Barcode079-LR:LR-Barcode091-LR.NlaIII	1	+
chr13	21673856	21673857	3.MB-P-224-T-Brain_PTS11-224.null:R-454-SB103.NlaIII	1	+
chr13	21817617	21817618	1.MB-P-008-T-Brain_PTS11-008.LR-Barcode077-LR:LR-Barcode089-LR.NlaIII	2	+
chr13	21841765	21841766	3.MB-P-224-T-Brain_PTS11-224.null:R-454-SB103.NlaIII	1	+
chr13	22059474	22059475	3.MB-P-524-T-Brain_PTS11-524.L-454-SB026:R-454-SB122.NlaIII	2	+
chr13	22152436	22152437	3.MB-P-386-T-Brain_PTS11-386.null:R-454-SB154.NlaIII	2	-
chr13	22160987	22160988	1.MB-P-068-T-Brain_PTS11-068.LR-Barcode258-LR:LR-Barcode244-LR.NlaIII	1	+
chr13	22599275	22599276	3.MB-P-421-T-Brain_PTS11-421.null:R-454-SB111.NlaIII	1	-
chr13	22745837	22745838	3.MB-P-791-T-Brain_PTS11-791.L-454-SB050:R-454-SB146.BfaI	1	+
chr13	22891210	22891211	8.MB-P-421-T-Brain_PTS11-421.L-454-SB192:null.BfaI	3	-
chr13	22936576	22936577	3.MB-P-793-T-Brain_PTS11-793.L-454-SB010:R-454-SB106.NlaIII	1	-
chr13	23109644	23109645	3.MB-P-849-T-Brain_PTS11-849.L-454-SB065:R-454-SB161.NlaIII	1	-
chr13	23218949	23218950	3.MB-P-PM98-T-Brain_PM-98.null:R-454-SB126.NlaIII	1	-
chr13	23913963	23913964	3.MB-P-280-T-Brain_PTS11-280.null:R-454-SB107.NlaIII	1	-
chr13	24148579	24148580	1.MB-P-068-T-Brain_PTS11-068.LR-Barcode258-LR:LR-Barcode244-LR.BfaI	8	-
chr13	24238036	24238037	3.MB-P-786-T-Brain_PTS11-786.L-454-SB042:R-454-SB138.NlaIII	2	+
chr13	24258163	24258164	3.MB-P-524-T-Brain_PTS11-524.L-454-SB026:R-454-SB122.NlaIII	1	-
chr13	24833771	24833772	1.MB-P-068-T-Brain_PTS11-068.LR-Barcode258-LR:LR-Barcode244-LR.NlaIII	2	+
chr13	24876629	24876630	3.MB-P-116-T-Brain_PTS11-116.null:R-454-SB134.NlaIII	1	+
chr13	25032406	25032407	3.MB-P-786-T-Brain_PTS11-786.L-454-SB042:R-454-SB138.NlaIII	1	-
chr13	25186684	25186685	6.MB-P-260-T-Brain_PTS11-260.L-454-SB018:R-454-SB114.NlaIII	1	+
chr13	25357785	25357786	3.MB-P-849-T-Brain_PTS11-849.L-454-SB065:R-454-SB161.BfaI	13	-
chr13	25415081	25415082	1.MB-P-068-T-Brain_PTS11-068.LR-Barcode258-LR:LR-Barcode244-LR.BfaI	1	-
chr13	25694041	25694042	1.MB-P-068-T-Brain_PTS11-068.LR-Barcode258-LR:LR-Barcode244-LR.NlaIII	2	+
chr13	26236554	26236555	3.MB-P-524-T-Brain_PTS11-524.L-454-SB026:R-454-SB122.NlaIII	1	+
chr13	26318918	26318919	1.MB-P-048-T-Brain_PTS11-048.LR-Barcode079-LR:LR-Barcode091-LR.NlaIII	1	-
chr13	26358075	26358076	1.MB-P-068-T-Brain_PTS11-068.LR-Barcode258-LR:LR-Barcode244-LR.BfaI	1	+
chr13	26450532	26450533	1.MB-P-068-T-Brain_PTS11-068.LR-Barcode258-LR:LR-Barcode244-LR.NlaIII	1	+
chr13	26502007	26502008	3.MB-P-116-T-Brain_PTS11-116.null:R-454-SB134.NlaIII	1	+
chr13	26555748	26555749	1.MB-P-068-T-Brain_PTS11-068.LR-Barcode258-LR:LR-Barcode244-LR.NlaIII	3	-
chr13	26976650	26976651	3.MB-P-580-T-Brain_PTS11-580.L-454-SB041:R-454-SB137.BfaI	1	-
chr13	26983927	26983928	3.MB-P-116-T-Brain_PTS11-116.null:R-454-SB134.NlaIII	1	+
chr13	27036945	27036946	1.MB-P-008-T-Brain_PTS11-008.LR-Barcode077-LR:LR-Barcode089-LR.NlaIII	1	+
chr13	27068527	27068528	3.MB-P-224-T-Brain_PTS11-224.null:R-454-SB103.NlaIII	1	+
chr13	27188560	27188561	2.MB-P-386-T-Brain_PTS11-386.LR-Barcode095-LR:null.BfaI	1	-
chr13	27530641	27530642	3.MB-P-793-T-Brain_PTS11-793.L-454-SB010:R-454-SB106.NlaIII	1	-
chr13	27572497	27572498	1.MB-P-068-T-Brain_PTS11-068.LR-Barcode258-LR:LR-Barcode244-LR.BfaI	2	+
chr13	27603546	27603547	4.MB-P-730-T-Brain_PTS11-730.L-454-SB046:R-454-SB142.BfaI	8	+
chr13	28087365	28087366	3.MB-P-791-T-Brain_PTS11-791.L-454-SB050:R-454-SB146.NlaIII	3	+
chr13	28102381	28102382	4.MB-P-730-T-Brain_PTS11-730.L-454-SB046:R-454-SB142.NlaIII	2	+
chr13	28344157	28344158	4.MB-P-730-T-Brain_PTS11-730.L-454-SB046:R-454-SB142.NlaIII	1	-
chr13	28626518	28626519	3.MB-P-580-T-Brain_PTS11-580.L-454-SB041:R-454-SB137.NlaIII	1	-
chr13	28638090	28638091	3.MB-P-421-T-Brain_PTS11-421.null:R-454-SB111.NlaIII	2	-
chr13	28766211	28766212	3.MB-P-224-T-Brain_PTS11-224.null:R-454-SB103.NlaIII	1	+
chr13	28831733	28831734	3.MB-P-224-T-Brain_PTS11-224.null:R-454-SB103.NlaIII	1	+
chr13	29041319	29041320	3.MB-P-849-T-Brain_PTS11-849.L-454-SB065:R-454-SB161.NlaIII	1	+
chr13	29101256	29101257	6.MB-P-883-T-Brain_PTS11-883.L-454-SB058:R-454-SB154.NlaIII	1	+
chr13	29201678	29201679	4.MB-P-903-T-Brain_PTS11-903.L-454-SB062:null.BfaI	1	+
chr13	29318874	29318875	3.MB-P-PM98-T-Brain_PM-98.null:R-454-SB126.NlaIII	2	+
chr13	29387539	29387540	3.MB-P-580-T-Brain_PTS11-580.L-454-SB041:R-454-SB137.NlaIII	3	-
chr13	29387732	29387733	3.MB-P-580-T-Brain_PTS11-580.L-454-SB041:R-454-SB137.NlaIII	1	-
chr13	29519162	29519163	6.MB-P-260-T-Brain_PTS11-260.L-454-SB018:R-454-SB114.BfaI.Freq=1|6.MB-P-260-T-Brain_PTS11-260.L-454-SB018:R-454-SB114.NlaIII.Freq=23	23	+
chr13	29567485	29567486	3.MB-P-580-T-Brain_PTS11-580.L-454-SB041:R-454-SB137.NlaIII	2	+
chr13	29576875	29576876	3.MB-P-704-T-Brain_PTS11-704.null:R-454-SB119.NlaIII	1	-
chr13	29586978	29586979	3.MB-P-580-T-Brain_PTS11-580.L-454-SB041:R-454-SB137.NlaIII	1	-
chr13	29713229	29713230	3.MB-P-580-T-Brain_PTS11-580.L-454-SB041:R-454-SB137.NlaIII	1	-
chr13	29736959	29736960	3.MB-P-580-T-Brain_PTS11-580.L-454-SB041:R-454-SB137.NlaIII	1	+
chr13	29903995	29903996	3.MB-P-580-T-Brain_PTS11-580.L-454-SB041:R-454-SB137.NlaIII	4	+
chr13	29993491	29993492	3.MB-P-421-T-Brain_PTS11-421.null:R-454-SB111.NlaIII	1	+
chr13	30374002	30374003	3.MB-P-791-T-Brain_PTS11-791.L-454-SB050:R-454-SB146.NlaIII	1	+
chr13	30442358	30442359	1.MB-P-048-T-Brain_PTS11-048.LR-Barcode079-LR:LR-Barcode091-LR.BfaI	1	-
chr13	30565211	30565212	3.MB-P-704-T-Brain_PTS11-704.null:R-454-SB119.NlaIII	1	-
chr13	30727374	30727375	3.MB-P-580-T-Brain_PTS11-580.L-454-SB041:R-454-SB137.NlaIII	1	-
chr13	30840522	30840523	3.MB-P-365-T-Brain_PTS11-365.L-454-SB009:R-454-SB105.BfaI	1	+
chr13	30879334	30879335	3.MB-P-511-T-Brain_PTS11-511.L-454-SB025:R-454-SB121.NlaIII	1	-
chr13	30937847	30937848	1.MB-P-008-T-Brain_PTS11-008.LR-Barcode077-LR:LR-Barcode089-LR.BfaI	1	+
chr13	31003606	31003607	3.MB-P-280-T-Brain_PTS11-280.null:R-454-SB107.NlaIII	1	-
chr13	31098040	31098041	3.MB-P-791-T-Brain_PTS11-791.L-454-SB050:R-454-SB146.NlaIII	1	-
chr13	31270179	31270180	3.MB-P-280-T-Brain_PTS11-280.null:R-454-SB107.NlaIII	1	+
chr13	31431192	31431193	3.MB-P-224-T-Brain_PTS11-224.null:R-454-SB103.NlaIII	1	+
chr13	31570450	31570451	4.MB-P-730-T-Brain_PTS11-730.L-454-SB046:R-454-SB142.NlaIII	2	-
chr13	31727546	31727547	3.MB-P-365-T-Brain_PTS11-365.L-454-SB009:R-454-SB105.BfaI	15	-
chr13	31858579	31858580	3.MB-P-580-T-Brain_PTS11-580.L-454-SB041:R-454-SB137.NlaIII	2	+
chr13	31960306	31960307	3.MB-P-793-T-Brain_PTS11-793.L-454-SB010:R-454-SB106.NlaIII	1	-
chr13	31990645	31990646	4.MB-P-730-T-Brain_PTS11-730.L-454-SB046:R-454-SB142.NlaIII	1	-
chr13	32053240	32053241	4.MB-P-730-T-Brain_PTS11-730.L-454-SB046:R-454-SB142.NlaIII	1	-
chr13	32132556	32132557	4.MB-P-730-T-Brain_PTS11-730.L-454-SB046:R-454-SB142.NlaIII	2	-
chr13	32132731	32132732	4.MB-P-730-T-Brain_PTS11-730.L-454-SB046:R-454-SB142.BfaI	6	+
chr13	32237791	32237792	3.MB-P-793-T-Brain_PTS11-793.L-454-SB010:R-454-SB106.NlaIII	1	+
chr13	32291832	32291833	1.MB-P-008-T-Brain_PTS11-008.LR-Barcode077-LR:LR-Barcode089-LR.BfaI	1	-
chr13	32361940	32361941	3.MB-P-791-T-Brain_PTS11-791.L-454-SB050:R-454-SB146.NlaIII	1	+
chr13	32363459	32363460	3.MB-P-286-T-Brain_PTS11-286.null:R-454-SB115.NlaIII	1	+
chr13	32399531	32399532	3.MB-P-704-T-Brain_PTS11-704.null:R-454-SB119.NlaIII	1	+
chr13	32560216	32560217	1.MB-P-048-T-Brain_PTS11-048.LR-Barcode079-LR:LR-Barcode091-LR.BfaI	1	-
chr13	32578140	32578141	3.MB-P-280-T-Brain_PTS11-280.null:R-454-SB107.NlaIII	1	+
chr13	32706278	32706279	1.MB-P-048-T-Brain_PTS11-048.LR-Barcode079-LR:LR-Barcode091-LR.BfaI	2	+
chr13	32899753	32899754	3.MB-P-793-T-Brain_PTS11-793.L-454-SB010:R-454-SB106.NlaIII	1	-
chr13	32901127	32901128	3.MB-P-580-T-Brain_PTS11-580.L-454-SB041:R-454-SB137.NlaIII	1	+
chr13	32976028	32976029	3.MB-P-580-T-Brain_PTS11-580.L-454-SB041:R-454-SB137.NlaIII	1	-
chr13	33008317	33008318	3.MB-P-421-T-Brain_PTS11-421.null:R-454-SB111.NlaIII	5	+
chr13	33036579	33036580	3.MB-P-849-T-Brain_PTS11-849.L-454-SB065:R-454-SB161.NlaIII	2	+
chr13	33185992	33185993	3.MB-P-386-T-Brain_PTS11-386.null:R-454-SB154.NlaIII	1	+
chr13	33205856	33205857	1.MB-P-008-T-Brain_PTS11-008.LR-Barcode077-LR:LR-Barcode089-LR.BfaI	2	+
chr13	33233377	33233378	2.MB-P-386-T-Brain_PTS11-386.LR-Barcode095-LR:null.BfaI	1	+
chr13	33321058	33321059	3.MB-P-580-T-Brain_PTS11-580.L-454-SB041:R-454-SB137.NlaIII	1	-
chr13	34005717	34005718	3.MB-P-224-T-Brain_PTS11-224.null:R-454-SB103.NlaIII	1	-
chr13	3404022	3404023	4.MB-P-754-T-Brain_PTS11-754.L-454-SB054:R-454-SB150.NlaIII	1	+
chr13	34046479	34046480	1.MB-P-008-T-Brain_PTS11-008.LR-Barcode077-LR:LR-Barcode089-LR.BfaI	1	-
chr13	34331206	34331207	3.MB-P-849-T-Brain_PTS11-849.L-454-SB065:R-454-SB161.NlaIII	3	+
chr13	34783226	34783227	3.MB-P-421-T-Brain_PTS11-421.null:R-454-SB111.NlaIII	1	+
chr13	3483914	3483915	4.MB-P-730-T-Brain_PTS11-730.L-454-SB046:R-454-SB142.BfaI	1	+
chr13	34972938	34972939	3.MB-P-524-T-Brain_PTS11-524.L-454-SB026:R-454-SB122.NlaIII	6	+
chr13	35406811	35406812	3.MB-P-386-T-Brain_PTS11-386.null:R-454-SB154.NlaIII	2	-
chr13	35597902	35597903	3.MB-P-704-T-Brain_PTS11-704.null:R-454-SB119.NlaIII	1	+
chr13	35623115	35623116	7.MB-P-288-T-Brain_PTS11-288.L-454-SB190:R-454-SB199.BfaI	13	-
chr13	35630839	35630840	7.MB-P-288-T-Brain_PTS11-288.L-454-SB190:R-454-SB199.BfaI	1	-
chr13	3569276	3569277	3.MB-P-580-T-Brain_PTS11-580.L-454-SB041:R-454-SB137.NlaIII	1	-
chr13	35911465	35911466	6.MB-P-833-T-Brain_PTS11-833.L-454-SB057:R-454-SB153.NlaIII	1	-
chr13	35939404	35939405	3.MB-P-386-T-Brain_PTS11-386.null:R-454-SB154.NlaIII	1	+
chr13	35999772	35999773	3.MB-P-116-T-Brain_PTS11-116.null:R-454-SB134.NlaIII	1	-
chr13	36619634	36619635	1.MB-P-048-T-Brain_PTS11-048.LR-Barcode079-LR:LR-Barcode091-LR.BfaI	2	+
chr13	36805255	36805256	3.MB-P-565-T-Brain_PTS11-565.L-454-SB033:R-454-SB129.NlaIII	1	+
chr13	36988811	36988812	3.MB-P-849-T-Brain_PTS11-849.L-454-SB065:R-454-SB161.NlaIII	1	+
chr13	37164204	37164205	1.MB-P-048-T-Brain_PTS11-048.LR-Barcode079-LR:LR-Barcode091-LR.NlaIII	1	+
chr13	37282712	37282713	3.MB-P-580-T-Brain_PTS11-580.L-454-SB041:R-454-SB137.NlaIII	1	-
chr13	3767554	3767555	3.MB-P-580-T-Brain_PTS11-580.L-454-SB041:R-454-SB137.NlaIII	1	-
chr13	38535016	38535017	3.MB-P-386-T-Brain_PTS11-386.null:R-454-SB154.NlaIII	1	+
chr13	38751351	38751352	3.MB-P-849-T-Brain_PTS11-849.L-454-SB065:R-454-SB161.NlaIII	1	-
chr13	38884241	38884242	6.MB-P-260-T-Brain_PTS11-260.L-454-SB018:R-454-SB114.NlaIII	1	-
chr13	3891084	3891085	1.MB-P-008-T-Brain_PTS11-008.LR-Barcode077-LR:LR-Barcode089-LR.NlaIII	1	-
chr13	39076998	39076999	3.MB-P-791-T-Brain_PTS11-791.L-454-SB050:R-454-SB146.NlaIII	1	+
chr13	39086747	39086748	3.MB-P-849-T-Brain_PTS11-849.L-454-SB065:R-454-SB161.NlaIII	1	-
chr13	3914337	3914338	1.MB-P-146-T-Brain_PTS11-146.LR-Barcode230-LR:LR-Barcode258-LR.NlaIII	41	+
chr13	3915371	3915372	1.MB-P-146-T-Brain_PTS11-146.LR-Barcode230-LR:LR-Barcode258-LR.NlaIII	5	+
chr13	39180206	39180207	6.MB-P-260-T-Brain_PTS11-260.L-454-SB018:R-454-SB114.NlaIII	1	-
chr13	39180233	39180234	3.MB-P-849-T-Brain_PTS11-849.L-454-SB065:R-454-SB161.NlaIII	1	+
chr13	39711280	39711281	3.MB-P-580-T-Brain_PTS11-580.L-454-SB041:R-454-SB137.NlaIII	1	+
chr13	39926803	39926804	1.MB-P-008-T-Brain_PTS11-008.LR-Barcode077-LR:LR-Barcode089-LR.NlaIII	1	+
chr13	40287314	40287315	3.MB-P-280-T-Brain_PTS11-280.null:R-454-SB107.NlaIII	2	-
chr13	40291161	40291162	3.MB-P-565-T-Brain_PTS11-565.L-454-SB033:R-454-SB129.NlaIII	1	+
chr13	40395805	40395806	3.MB-P-421-T-Brain_PTS11-421.null:R-454-SB111.NlaIII	1	+
chr13	41151588	41151589	6.MB-P-260-T-Brain_PTS11-260.L-454-SB018:R-454-SB114.NlaIII	5	+
chr13	4144449	4144450	1.MB-P-068-T-Brain_PTS11-068.LR-Barcode258-LR:LR-Barcode244-LR.NlaIII	1	-
chr13	41661199	41661200	1.MB-P-146-T-Brain_PTS11-146.LR-Barcode230-LR:LR-Barcode258-LR.BfaI	1	-
chr13	41806704	41806705	3.MB-P-224-T-Brain_PTS11-224.null:R-454-SB103.NlaIII	1	+
chr13	42016968	42016969	3.MB-P-791-T-Brain_PTS11-791.L-454-SB050:R-454-SB146.NlaIII	1	+
chr13	42041995	42041996	3.MB-P-565-T-Brain_PTS11-565.L-454-SB033:R-454-SB129.NlaIII	1	+
chr13	42069512	42069513	4.MB-P-730-T-Brain_PTS11-730.L-454-SB046:R-454-SB142.NlaIII	1	-
chr13	4226319	4226320	1.MB-P-068-T-Brain_PTS11-068.LR-Barcode258-LR:LR-Barcode244-LR.BfaI	1	-
chr13	42282462	42282463	3.MB-P-786-T-Brain_PTS11-786.L-454-SB042:R-454-SB138.NlaIII	2	+
chr13	42864977	42864978	3.MB-P-511-T-Brain_PTS11-511.L-454-SB025:R-454-SB121.NlaIII	1	+
chr13	42879755	42879756	1.MB-P-048-T-Brain_PTS11-048.LR-Barcode079-LR:LR-Barcode091-LR.NlaIII	1	+
chr13	4289973	4289974	3.MB-P-224-T-Brain_PTS11-224.null:R-454-SB103.NlaIII	2	-
chr13	43054729	43054730	4.MB-P-730-T-Brain_PTS11-730.L-454-SB046:R-454-SB142.NlaIII	1	+
chr13	43161259	43161260	3.MB-P-524-T-Brain_PTS11-524.L-454-SB026:R-454-SB122.NlaIII	1	-
chr13	43316497	43316498	3.MB-P-116-T-Brain_PTS11-116.null:R-454-SB134.NlaIII	1	-
chr13	43528850	43528851	3.MB-P-704-T-Brain_PTS11-704.null:R-454-SB119.NlaIII	1	+
chr13	43737381	43737382	3.MB-P-524-T-Brain_PTS11-524.L-454-SB026:R-454-SB122.NlaIII	1	+
chr13	44216238	44216239	3.MB-P-704-T-Brain_PTS11-704.null:R-454-SB119.NlaIII	2	-
chr13	44270957	44270958	3.MB-P-224-T-Brain_PTS11-224.null:R-454-SB103.NlaIII	1	-
chr13	44646916	44646917	3.MB-P-280-T-Brain_PTS11-280.null:R-454-SB107.NlaIII	1	+
chr13	44867603	44867604	3.MB-P-286-T-Brain_PTS11-286.null:R-454-SB115.NlaIII	1	-
chr13	44971004	44971005	3.MB-P-421-T-Brain_PTS11-421.null:R-454-SB111.NlaIII	1	-
chr13	44980235	44980236	1.MB-P-048-T-Brain_PTS11-048.LR-Barcode079-LR:LR-Barcode091-LR.BfaI	1	-
chr13	44980445	44980446	3.MB-P-421-T-Brain_PTS11-421.null:R-454-SB111.NlaIII	1	-
chr13	45441759	45441760	6.MB-P-756-T-Brain_PTS11-756.L-454-SB042:R-454-SB138.NlaIII	1	-
chr13	45741077	45741078	3.MB-P-349-T-Brain_PTS11-349.L-454-SB002:null.BfaI	2	-
chr13	45904677	45904678	3.MB-P-280-T-Brain_PTS11-280.null:R-454-SB107.NlaIII	1	-
chr13	45908113	45908114	3.MB-P-280-T-Brain_PTS11-280.null:R-454-SB107.NlaIII	5	+
chr13	45962436	45962437	3.MB-P-224-T-Brain_PTS11-224.null:R-454-SB103.NlaIII	1	+
chr13	4604989	4604990	1.MB-P-148-T-Brain_PTS11-148.LR-Barcode240-LR:LR-Barcode079-LR.BfaI	2	+
chr13	46625838	46625839	3.MB-P-386-T-Brain_PTS11-386.null:R-454-SB154.NlaIII	1	-
chr13	46638796	46638797	6.MB-P-833-T-Brain_PTS11-833.L-454-SB057:R-454-SB153.NlaIII	1	+
chr13	46958737	46958738	3.MB-P-365-T-Brain_PTS11-365.L-454-SB009:R-454-SB105.NlaIII	1	+
chr13	47016347	47016348	3.MB-P-366-T-Brain_PTS11-366.null:R-454-SB131.NlaIII	1	+
chr13	47127613	47127614	3.MB-P-580-T-Brain_PTS11-580.L-454-SB041:R-454-SB137.NlaIII	2	-
chr13	47434552	47434553	3.MB-P-366-T-Brain_PTS11-366.null:R-454-SB131.NlaIII	1	-
chr13	47746938	47746939	3.MB-P-849-T-Brain_PTS11-849.L-454-SB065:R-454-SB161.NlaIII	2	-
chr13	48310188	48310189	3.MB-P-580-T-Brain_PTS11-580.L-454-SB041:R-454-SB137.NlaIII	1	-
chr13	48626206	48626207	3.MB-P-116-T-Brain_PTS11-116.null:R-454-SB134.NlaIII	1	-
chr13	48987482	48987483	3.MB-P-016-T-Brain_PTS11-016.L-454-SB001:R-454-SB097.NlaIII	1	-
chr13	49048419	49048420	3.MB-P-580-T-Brain_PTS11-580.L-454-SB041:R-454-SB137.NlaIII	1	-
chr13	4920203	4920204	4.MB-P-754-T-Brain_PTS11-754.L-454-SB054:R-454-SB150.NlaIII	1	+
chr13	49211198	49211199	3.MB-P-224-T-Brain_PTS11-224.null:R-454-SB103.NlaIII	1	-
chr13	49448585	49448586	3.MB-P-511-T-Brain_PTS11-511.L-454-SB025:R-454-SB121.NlaIII	1	+
chr13	49472363	49472364	3.MB-P-524-T-Brain_PTS11-524.L-454-SB026:R-454-SB122.NlaIII	1	+
chr13	49600471	49600472	3.MB-P-386-T-Brain_PTS11-386.null:R-454-SB154.NlaIII	1	-
chr13	49699154	49699155	3.MB-P-778-T-Brain_PTS11-778.L-454-SB034:R-454-SB130.NlaIII	1	-
chr13	49801516	49801517	3.MB-P-778-T-Brain_PTS11-778.L-454-SB034:R-454-SB130.BfaI	16	+
chr13	49828002	49828003	1.MB-P-048-T-Brain_PTS11-048.LR-Barcode079-LR:LR-Barcode091-LR.BfaI	1	-
chr13	49835865	49835866	3.MB-P-224-T-Brain_PTS11-224.null:R-454-SB103.NlaIII	1	-
chr13	5045894	5045895	6.MB-P-260-T-Brain_PTS11-260.L-454-SB018:R-454-SB114.NlaIII	23	-
chr13	5098581	5098582	3.MB-P-849-T-Brain_PTS11-849.L-454-SB065:R-454-SB161.NlaIII	3	-
chr13	5113956	5113957	3.MB-P-791-T-Brain_PTS11-791.L-454-SB050:R-454-SB146.NlaIII	1	+
chr13	51836609	51836610	1.MB-P-008-T-Brain_PTS11-008.LR-Barcode077-LR:LR-Barcode089-LR.NlaIII	1	-
chr13	51908350	51908351	3.MB-P-386-T-Brain_PTS11-386.null:R-454-SB154.NlaIII	2	-
chr13	52093114	52093115	1.MB-P-068-T-Brain_PTS11-068.LR-Barcode258-LR:LR-Barcode244-LR.BfaI	1	-
chr13	52259594	52259595	1.MB-P-048-T-Brain_PTS11-048.LR-Barcode079-LR:LR-Barcode091-LR.NlaIII	2	+
chr13	5231604	5231605	3.MB-P-704-T-Brain_PTS11-704.null:R-454-SB119.NlaIII	1	+
chr13	5235970	5235971	3.MB-P-704-T-Brain_PTS11-704.null:R-454-SB119.NlaIII	4	-
chr13	52410398	52410399	3.MB-P-386-T-Brain_PTS11-386.null:R-454-SB154.NlaIII	1	-
chr13	5249621	5249622	3.MB-P-457-T-Brain_PTS11-457.L-454-SB017:R-454-SB113.NlaIII	1	-
chr13	52555258	52555259	3.MB-P-224-T-Brain_PTS11-224.null:R-454-SB103.NlaIII	1	+
chr13	52556639	52556640	3.MB-P-224-T-Brain_PTS11-224.null:R-454-SB103.NlaIII	1	+
chr13	5272658	5272659	1.MB-P-068-T-Brain_PTS11-068.LR-Barcode258-LR:LR-Barcode244-LR.BfaI	1	-
chr13	53069338	53069339	3.MB-P-524-T-Brain_PTS11-524.L-454-SB026:R-454-SB122.NlaIII	1	+
chr13	53282671	53282672	4.MB-P-730-T-Brain_PTS11-730.L-454-SB046:R-454-SB142.NlaIII	7	+
chr13	53302534	53302535	4.MB-P-730-T-Brain_PTS11-730.L-454-SB046:R-454-SB142.NlaIII	19	-
chr13	53498890	53498891	3.MB-P-565-T-Brain_PTS11-565.L-454-SB033:R-454-SB129.NlaIII	1	+
chr13	5367235	5367236	1.MB-P-008-T-Brain_PTS11-008.LR-Barcode077-LR:LR-Barcode089-LR.NlaIII	1	+
chr13	53991565	53991566	4.MB-P-754-T-Brain_PTS11-754.L-454-SB054:R-454-SB150.NlaIII	1	-
chr13	54214550	54214551	3.MB-P-224-T-Brain_PTS11-224.null:R-454-SB103.NlaIII	1	-
chr13	54400464	54400465	3.MB-P-580-T-Brain_PTS11-580.L-454-SB041:R-454-SB137.NlaIII	7	+
chr13	54764430	54764431	3.MB-P-704-T-Brain_PTS11-704.null:R-454-SB119.NlaIII	1	+
chr13	54853865	54853866	3.MB-P-791-T-Brain_PTS11-791.L-454-SB050:R-454-SB146.NlaIII	1	+
chr13	5497276	5497277	3.MB-P-849-T-Brain_PTS11-849.L-454-SB065:R-454-SB161.NlaIII	5	-
chr13	55102429	55102430	3.MB-P-524-T-Brain_PTS11-524.L-454-SB026:R-454-SB122.BfaI	5	+
chr13	55182957	55182958	3.MB-P-457-T-Brain_PTS11-457.L-454-SB017:R-454-SB113.BfaI	4	-
chr13	5531621	5531622	4.MB-P-730-T-Brain_PTS11-730.L-454-SB046:R-454-SB142.NlaIII	1	+
chr13	5551647	5551648	6.MB-P-349-T-Brain_PTS11-349.null:R-454-SB122.NlaIII	1	-
chr13	55889760	55889761	3.MB-P-524-T-Brain_PTS11-524.L-454-SB026:R-454-SB122.NlaIII	2	+
chr13	55983095	55983096	3.MB-P-524-T-Brain_PTS11-524.L-454-SB026:R-454-SB122.NlaIII	1	-
chr13	5604678	5604679	3.MB-P-849-T-Brain_PTS11-849.L-454-SB065:R-454-SB161.NlaIII	1	-
chr13	56076055	56076056	3.MB-P-524-T-Brain_PTS11-524.L-454-SB026:R-454-SB122.NlaIII	11	-
chr13	56398426	56398427	3.MB-P-580-T-Brain_PTS11-580.L-454-SB041:R-454-SB137.NlaIII	1	+
chr13	56403073	56403074	3.MB-P-580-T-Brain_PTS11-580.L-454-SB041:R-454-SB137.NlaIII	1	-
chr13	56706641	56706642	1.MB-P-008-T-Brain_PTS11-008.LR-Barcode077-LR:LR-Barcode089-LR.BfaI	2	+
chr13	56826824	56826825	1.MB-P-008-T-Brain_PTS11-008.LR-Barcode077-LR:LR-Barcode089-LR.NlaIII	2	+
chr13	57021551	57021552	3.MB-P-421-T-Brain_PTS11-421.null:R-454-SB111.NlaIII	1	-
chr13	57131349	57131350	3.MB-P-524-T-Brain_PTS11-524.L-454-SB026:R-454-SB122.NlaIII	1	-
chr13	57451470	57451471	6.MB-P-756-T-Brain_PTS11-756.L-454-SB042:R-454-SB138.NlaIII	1	+
chr13	57525198	57525199	3.MB-P-224-T-Brain_PTS11-224.null:R-454-SB103.NlaIII	1	+
chr13	57618760	57618761	1.MB-P-048-T-Brain_PTS11-048.LR-Barcode079-LR:LR-Barcode091-LR.NlaIII	1	-
chr13	5794412	5794413	3.MB-P-524-T-Brain_PTS11-524.L-454-SB026:R-454-SB122.NlaIII	2	+
chr13	58034835	58034836	3.MB-P-791-T-Brain_PTS11-791.L-454-SB050:R-454-SB146.NlaIII	1	-
chr13	5808908	5808909	1.MB-P-048-T-Brain_PTS11-048.LR-Barcode079-LR:LR-Barcode091-LR.NlaIII	1	-
chr13	58127018	58127019	3.MB-P-791-T-Brain_PTS11-791.L-454-SB050:R-454-SB146.NlaIII	1	+
chr13	58353400	58353401	3.MB-P-786-T-Brain_PTS11-786.L-454-SB042:R-454-SB138.NlaIII	1	+
chr13	58422295	58422296	2.MB-P-386-T-Brain_PTS11-386.LR-Barcode095-LR:null.BfaI.Freq=4|3.MB-P-386-T-Brain_PTS11-386.null:R-454-SB154.NlaIII.Freq=2	4	-
chr13	58801637	58801638	3.MB-P-224-T-Brain_PTS11-224.null:R-454-SB103.NlaIII	1	+
chr13	58915879	58915880	3.MB-P-421-T-Brain_PTS11-421.null:R-454-SB111.NlaIII	1	-
chr13	5926039	5926040	1.MB-P-008-T-Brain_PTS11-008.LR-Barcode077-LR:LR-Barcode089-LR.NlaIII	2	-
chr13	59311048	59311049	3.MB-P-524-T-Brain_PTS11-524.L-454-SB026:R-454-SB122.NlaIII	1	-
chr13	59475219	59475220	4.MB-P-730-T-Brain_PTS11-730.L-454-SB046:R-454-SB142.NlaIII	2	-
chr13	59617784	59617785	1.MB-P-008-T-Brain_PTS11-008.LR-Barcode077-LR:LR-Barcode089-LR.NlaIII	1	-
chr13	5963363	5963364	4.MB-P-730-T-Brain_PTS11-730.L-454-SB046:R-454-SB142.NlaIII	1	-
chr13	60220728	60220729	3.MB-P-366-T-Brain_PTS11-366.null:R-454-SB131.NlaIII	3	+
chr13	6046147	6046148	1.MB-P-048-T-Brain_PTS11-048.LR-Barcode079-LR:LR-Barcode091-LR.BfaI	1	+
chr13	61104523	61104524	3.MB-P-791-T-Brain_PTS11-791.L-454-SB050:R-454-SB146.NlaIII	1	-
chr13	61150995	61150996	3.MB-P-791-T-Brain_PTS11-791.L-454-SB050:R-454-SB146.NlaIII	1	-
chr13	61197379	61197380	3.MB-P-421-T-Brain_PTS11-421.null:R-454-SB111.NlaIII	3	+
chr13	61227388	61227389	3.MB-P-791-T-Brain_PTS11-791.L-454-SB050:R-454-SB146.NlaIII	1	-
chr13	61290416	61290417	3.MB-P-791-T-Brain_PTS11-791.L-454-SB050:R-454-SB146.NlaIII	1	+
chr13	61309988	61309989	3.MB-P-793-T-Brain_PTS11-793.L-454-SB010:R-454-SB106.BfaI	15	+
chr13	61385359	61385360	3.MB-P-421-T-Brain_PTS11-421.null:R-454-SB111.NlaIII	2	+
chr13	61385592	61385593	3.MB-P-421-T-Brain_PTS11-421.null:R-454-SB111.NlaIII	1	+
chr13	61559559	61559560	3.MB-P-791-T-Brain_PTS11-791.L-454-SB050:R-454-SB146.NlaIII	1	-
chr13	63659879	63659880	3.MB-P-524-T-Brain_PTS11-524.L-454-SB026:R-454-SB122.NlaIII	58	+
chr13	63765155	63765156	3.MB-P-421-T-Brain_PTS11-421.null:R-454-SB111.NlaIII	1	+
chr13	6385527	6385528	3.MB-P-791-T-Brain_PTS11-791.L-454-SB050:R-454-SB146.NlaIII	1	-
chr13	64065790	64065791	6.MB-P-756-T-Brain_PTS11-756.L-454-SB042:R-454-SB138.BfaI	1	-
chr13	64338258	64338259	1.MB-P-048-T-Brain_PTS11-048.LR-Barcode079-LR:LR-Barcode091-LR.BfaI	1	+
chr13	6469408	6469409	3.MB-P-565-T-Brain_PTS11-565.L-454-SB033:R-454-SB129.NlaIII	1	-
chr13	64835680	64835681	1.MB-P-048-T-Brain_PTS11-048.LR-Barcode079-LR:LR-Barcode091-LR.BfaI	1	+
chr13	64837484	64837485	1.MB-P-048-T-Brain_PTS11-048.LR-Barcode079-LR:LR-Barcode091-LR.NlaIII	1	-
chr13	65058877	65058878	3.MB-P-PM98-T-Brain_PM-98.null:R-454-SB126.NlaIII	3	-
chr13	65165247	65165248	1.MB-P-048-T-Brain_PTS11-048.LR-Barcode079-LR:LR-Barcode091-LR.BfaI	2	-
chr13	65386097	65386098	3.MB-P-849-T-Brain_PTS11-849.L-454-SB065:R-454-SB161.NlaIII	1	+
chr13	6639605	6639606	3.MB-P-580-T-Brain_PTS11-580.L-454-SB041:R-454-SB137.NlaIII	1	+
chr13	67035400	67035401	1.MB-P-048-T-Brain_PTS11-048.LR-Barcode079-LR:LR-Barcode091-LR.NlaIII	1	-
chr13	67043458	67043459	3.MB-P-793-T-Brain_PTS11-793.L-454-SB010:R-454-SB106.NlaIII	1	-
chr13	67177787	67177788	1.MB-P-068-T-Brain_PTS11-068.LR-Barcode258-LR:LR-Barcode244-LR.BfaI	1	+
chr13	67364574	67364575	3.MB-P-280-T-Brain_PTS11-280.null:R-454-SB107.NlaIII	1	-
chr13	6772089	6772090	3.MB-P-280-T-Brain_PTS11-280.null:R-454-SB107.NlaIII	1	-
chr13	67923872	67923873	1.MB-P-008-T-Brain_PTS11-008.LR-Barcode077-LR:LR-Barcode089-LR.NlaIII	1	-
chr13	67934702	67934703	1.MB-P-148-T-Brain_PTS11-148.LR-Barcode240-LR:LR-Barcode079-LR.NlaIII	1	+
chr13	6798608	6798609	3.MB-P-580-T-Brain_PTS11-580.L-454-SB041:R-454-SB137.NlaIII	1	-
chr13	6832337	6832338	3.MB-P-224-T-Brain_PTS11-224.null:R-454-SB103.NlaIII	1	-
chr13	68447251	68447252	1.MB-P-008-T-Brain_PTS11-008.LR-Barcode077-LR:LR-Barcode089-LR.BfaI	1	-
chr13	68687039	68687040	3.MB-P-786-T-Brain_PTS11-786.L-454-SB042:R-454-SB138.NlaIII	4	+
chr13	68806108	68806109	3.MB-P-224-T-Brain_PTS11-224.null:R-454-SB103.NlaIII	26	+
chr13	68895262	68895263	3.MB-P-786-T-Brain_PTS11-786.L-454-SB042:R-454-SB138.NlaIII	2	+
chr13	68938180	68938181	3.MB-P-224-T-Brain_PTS11-224.null:R-454-SB103.NlaIII	1	-
chr13	68982779	68982780	3.MB-P-PM98-T-Brain_PM-98.null:R-454-SB126.NlaIII	2	-
chr13	69079253	69079254	3.MB-P-786-T-Brain_PTS11-786.L-454-SB042:R-454-SB138.BfaI	1	-
chr13	69270770	69270771	3.MB-P-421-T-Brain_PTS11-421.null:R-454-SB111.NlaIII	1	+
chr13	69342303	69342304	8.MB-P-224-T-Brain_PTS11-224.L-454-SB191:null.BfaI	6	-
chr13	69346322	69346323	4.MB-P-730-T-Brain_PTS11-730.L-454-SB046:R-454-SB142.NlaIII	1	+
chr13	69455942	69455943	3.MB-P-580-T-Brain_PTS11-580.L-454-SB041:R-454-SB137.NlaIII	1	+
chr13	69522063	69522064	1.MB-P-008-T-Brain_PTS11-008.LR-Barcode077-LR:LR-Barcode089-LR.BfaI	7	-
chr13	69749365	69749366	3.MB-P-786-T-Brain_PTS11-786.L-454-SB042:R-454-SB138.NlaIII	4	-
chr13	70190265	70190266	3.MB-P-580-T-Brain_PTS11-580.L-454-SB041:R-454-SB137.NlaIII	1	+
chr13	70352559	70352560	1.MB-P-008-T-Brain_PTS11-008.LR-Barcode077-LR:LR-Barcode089-LR.NlaIII	1	+
chr13	70361906	70361907	3.MB-P-786-T-Brain_PTS11-786.L-454-SB042:R-454-SB138.NlaIII	1	+
chr13	70676674	70676675	1.MB-P-008-T-Brain_PTS11-008.LR-Barcode077-LR:LR-Barcode089-LR.NlaIII	1	-
chr13	70940830	70940831	3.MB-P-224-T-Brain_PTS11-224.null:R-454-SB103.NlaIII	1	-
chr13	70979403	70979404	1.MB-P-068-T-Brain_PTS11-068.LR-Barcode258-LR:LR-Barcode244-LR.BfaI	1	-
chr13	71185365	71185366	3.MB-P-786-T-Brain_PTS11-786.L-454-SB042:R-454-SB138.NlaIII	1	+
chr13	71206646	71206647	1.MB-P-148-T-Brain_PTS11-148.LR-Barcode240-LR:LR-Barcode079-LR.BfaI	1	+
chr13	71246151	71246152	3.MB-P-421-T-Brain_PTS11-421.null:R-454-SB111.NlaIII	1	+
chr13	71395391	71395392	3.MB-P-421-T-Brain_PTS11-421.null:R-454-SB111.NlaIII	1	-
chr13	71421202	71421203	3.MB-P-280-T-Brain_PTS11-280.null:R-454-SB107.NlaIII	1	-
chr13	71501709	71501710	3.MB-P-849-T-Brain_PTS11-849.L-454-SB065:R-454-SB161.NlaIII	1	+
chr13	71559722	71559723	3.MB-P-580-T-Brain_PTS11-580.L-454-SB041:R-454-SB137.NlaIII	1	-
chr13	7175454	7175455	1.MB-P-008-T-Brain_PTS11-008.LR-Barcode077-LR:LR-Barcode089-LR.NlaIII	1	+
chr13	71802134	71802135	1.MB-P-068-T-Brain_PTS11-068.LR-Barcode258-LR:LR-Barcode244-LR.BfaI.Merge	11	-
chr13	71875470	71875471	3.MB-P-224-T-Brain_PTS11-224.null:R-454-SB103.NlaIII	1	-
chr13	71991674	71991675	3.MB-P-224-T-Brain_PTS11-224.null:R-454-SB103.NlaIII	1	+
chr13	72016452	72016453	3.MB-P-421-T-Brain_PTS11-421.null:R-454-SB111.NlaIII	1	-
chr13	72104778	72104779	1.MB-P-068-T-Brain_PTS11-068.LR-Barcode258-LR:LR-Barcode244-LR.BfaI	1	+
chr13	72114323	72114324	3.MB-P-224-T-Brain_PTS11-224.null:R-454-SB103.NlaIII	2	-
chr13	72117532	72117533	3.MB-P-421-T-Brain_PTS11-421.null:R-454-SB111.NlaIII	1	+
chr13	72238474	72238475	3.MB-P-786-T-Brain_PTS11-786.L-454-SB042:R-454-SB138.NlaIII	2	+
chr13	72322029	72322030	1.MB-P-068-T-Brain_PTS11-068.LR-Barcode258-LR:LR-Barcode244-LR.BfaI	1	+
chr13	72332828	72332829	8.MB-P-224-T-Brain_PTS11-224.L-454-SB191:null.BfaI	2	-
chr13	72335012	72335013	3.MB-P-421-T-Brain_PTS11-421.null:R-454-SB111.NlaIII	3	-
chr13	72339373	72339374	3.MB-P-224-T-Brain_PTS11-224.null:R-454-SB103.NlaIII	1	+
chr13	72346868	72346869	7.MB-P-288-T-Brain_PTS11-288.L-454-SB190:R-454-SB199.BfaI	72	-
chr13	72366385	72366386	3.MB-P-580-T-Brain_PTS11-580.L-454-SB041:R-454-SB137.NlaIII	1	+
chr13	72656339	72656340	1.MB-P-068-T-Brain_PTS11-068.LR-Barcode258-LR:LR-Barcode244-LR.NlaIII	1	+
chr13	72850104	72850105	3.MB-P-580-T-Brain_PTS11-580.L-454-SB041:R-454-SB137.BfaI	1	+
chr13	72910645	72910646	3.MB-P-224-T-Brain_PTS11-224.null:R-454-SB103.NlaIII	6	-
chr13	72950666	72950667	3.MB-P-457-T-Brain_PTS11-457.L-454-SB017:R-454-SB113.NlaIII	1	+
chr13	73007712	73007713	3.MB-P-786-T-Brain_PTS11-786.L-454-SB042:R-454-SB138.BfaI	15	+
chr13	73012467	73012468	3.MB-P-786-T-Brain_PTS11-786.L-454-SB042:R-454-SB138.NlaIII	1	-
chr13	73088066	73088067	1.MB-P-146-T-Brain_PTS11-146.LR-Barcode230-LR:LR-Barcode258-LR.BfaI	1	-
chr13	73313093	73313094	3.MB-P-280-T-Brain_PTS11-280.null:R-454-SB107.NlaIII	1	-
chr13	73373740	73373741	3.MB-P-786-T-Brain_PTS11-786.L-454-SB042:R-454-SB138.NlaIII	1	+
chr13	73468001	73468002	3.MB-P-PM98-T-Brain_PM-98.null:R-454-SB126.NlaIII	1	+
chr13	73486230	73486231	3.MB-P-778-T-Brain_PTS11-778.L-454-SB034:R-454-SB130.NlaIII	79	+
chr13	7364445	7364446	1.MB-P-008-T-Brain_PTS11-008.LR-Barcode077-LR:LR-Barcode089-LR.BfaI	14	-
chr13	73681305	73681306	3.MB-P-849-T-Brain_PTS11-849.L-454-SB065:R-454-SB161.NlaIII	2	-
chr13	73725019	73725020	3.MB-P-786-T-Brain_PTS11-786.L-454-SB042:R-454-SB138.NlaIII	2	+
chr13	73792971	73792972	3.MB-P-286-T-Brain_PTS11-286.null:R-454-SB115.NlaIII	1	-
chr13	74049067	74049068	3.MB-P-386-T-Brain_PTS11-386.null:R-454-SB154.NlaIII	1	-
chr13	74078545	74078546	3.MB-P-786-T-Brain_PTS11-786.L-454-SB042:R-454-SB138.NlaIII	1	-
chr13	74231224	74231225	3.MB-P-224-T-Brain_PTS11-224.null:R-454-SB103.NlaIII	1	-
chr13	74405350	74405351	8.MB-P-224-T-Brain_PTS11-224.L-454-SB191:null.BfaI	2	+
chr13	74419570	74419571	3.MB-P-580-T-Brain_PTS11-580.L-454-SB041:R-454-SB137.NlaIII	1	+
chr13	74609258	74609259	4.MB-P-730-T-Brain_PTS11-730.L-454-SB046:R-454-SB142.NlaIII	1	+
chr13	74952923	74952924	1.MB-P-146-T-Brain_PTS11-146.LR-Barcode230-LR:LR-Barcode258-LR.BfaI	1	-
chr13	74995218	74995219	1.MB-P-008-T-Brain_PTS11-008.LR-Barcode077-LR:LR-Barcode089-LR.BfaI	2	-
chr13	75131869	75131870	3.MB-P-786-T-Brain_PTS11-786.L-454-SB042:R-454-SB138.NlaIII	1	-
chr13	75197058	75197059	3.MB-P-386-T-Brain_PTS11-386.null:R-454-SB154.NlaIII	1	-
chr13	75202532	75202533	3.MB-P-280-T-Brain_PTS11-280.null:R-454-SB107.NlaIII	1	-
chr13	75483324	75483325	3.MB-P-580-T-Brain_PTS11-580.L-454-SB041:R-454-SB137.NlaIII	2	-
chr13	75596311	75596312	3.MB-P-224-T-Brain_PTS11-224.null:R-454-SB103.NlaIII	1	+
chr13	75761199	75761200	3.MB-P-457-T-Brain_PTS11-457.L-454-SB017:R-454-SB113.NlaIII	1	-
chr13	75984308	75984309	4.MB-P-730-T-Brain_PTS11-730.L-454-SB046:R-454-SB142.NlaIII	1	+
chr13	7600499	7600500	1.MB-P-068-T-Brain_PTS11-068.LR-Barcode258-LR:LR-Barcode244-LR.BfaI	2	-
chr13	76119716	76119717	3.MB-P-421-T-Brain_PTS11-421.null:R-454-SB111.NlaIII	1	-
chr13	76562934	76562935	3.MB-P-224-T-Brain_PTS11-224.null:R-454-SB103.NlaIII	1	+
chr13	7675113	7675114	1.MB-P-068-T-Brain_PTS11-068.LR-Barcode258-LR:LR-Barcode244-LR.NlaIII	1	-
chr13	76794206	76794207	3.MB-P-786-T-Brain_PTS11-786.L-454-SB042:R-454-SB138.NlaIII	1	+
chr13	76819982	76819983	3.MB-P-224-T-Brain_PTS11-224.null:R-454-SB103.NlaIII	1	+
chr13	76833947	76833948	3.MB-P-224-T-Brain_PTS11-224.null:R-454-SB103.NlaIII	1	+
chr13	77059068	77059069	3.MB-P-224-T-Brain_PTS11-224.null:R-454-SB103.NlaIII	2	-
chr13	77408895	77408896	1.MB-P-048-T-Brain_PTS11-048.LR-Barcode079-LR:LR-Barcode091-LR.NlaIII	1	+
chr13	77442767	77442768	3.MB-P-751-T-Brain_PTS11-751.null:R-454-SB127.NlaIII	1	-
chr13	77589981	77589982	1.MB-P-008-T-Brain_PTS11-008.LR-Barcode077-LR:LR-Barcode089-LR.BfaI	1	-
chr13	77870423	77870424	6.MB-P-756-T-Brain_PTS11-756.L-454-SB042:R-454-SB138.NlaIII	1	-
chr13	77972284	77972285	8.MB-P-224-T-Brain_PTS11-224.L-454-SB191:null.BfaI	15	+
chr13	78014206	78014207	1.MB-P-008-T-Brain_PTS11-008.LR-Barcode077-LR:LR-Barcode089-LR.NlaIII	2	+
chr13	78237943	78237944	1.MB-P-008-T-Brain_PTS11-008.LR-Barcode077-LR:LR-Barcode089-LR.NlaIII	1	-
chr13	78330995	78330996	1.MB-P-008-T-Brain_PTS11-008.LR-Barcode077-LR:LR-Barcode089-LR.BfaI	1	+
chr13	78367864	78367865	1.MB-P-048-T-Brain_PTS11-048.LR-Barcode079-LR:LR-Barcode091-LR.NlaIII	1	-
chr13	78591133	78591134	3.MB-P-793-T-Brain_PTS11-793.L-454-SB010:R-454-SB106.NlaIII	1	-
chr13	78854281	78854282	3.MB-P-793-T-Brain_PTS11-793.L-454-SB010:R-454-SB106.BfaI	17	-
chr13	79288182	79288183	1.MB-P-146-T-Brain_PTS11-146.LR-Barcode230-LR:LR-Barcode258-LR.NlaIII	1	-
chr13	80030303	80030304	3.MB-P-786-T-Brain_PTS11-786.L-454-SB042:R-454-SB138.NlaIII	1	-
chr13	80338167	80338168	3.MB-P-791-T-Brain_PTS11-791.L-454-SB050:R-454-SB146.NlaIII	1	-
chr13	80609712	80609713	3.MB-P-793-T-Brain_PTS11-793.L-454-SB010:R-454-SB106.BfaI	2	-
chr13	80669109	80669110	3.MB-P-421-T-Brain_PTS11-421.null:R-454-SB111.NlaIII	1	+
chr13	80851206	80851207	3.MB-P-786-T-Brain_PTS11-786.L-454-SB042:R-454-SB138.NlaIII	1	+
chr13	81095359	81095360	3.MB-P-751-T-Brain_PTS11-751.null:R-454-SB127.NlaIII	1	-
chr13	81145951	81145952	6.MB-P-756-T-Brain_PTS11-756.L-454-SB042:R-454-SB138.NlaIII	2	+
chr13	81150507	81150508	3.MB-P-457-T-Brain_PTS11-457.L-454-SB017:R-454-SB113.BfaI	5	+
chr13	81150522	81150523	4.MB-P-903-T-Brain_PTS11-903.L-454-SB062:null.BfaI	9	+
chr13	81406431	81406432	1.MB-P-068-T-Brain_PTS11-068.LR-Barcode258-LR:LR-Barcode244-LR.BfaI	1	-
chr13	81543347	81543348	3.MB-P-786-T-Brain_PTS11-786.L-454-SB042:R-454-SB138.NlaIII	1	-
chr13	81709308	81709309	1.MB-P-148-T-Brain_PTS11-148.LR-Barcode240-LR:LR-Barcode079-LR.NlaIII	1	-
chr13	8186974	8186975	1.MB-P-068-T-Brain_PTS11-068.LR-Barcode258-LR:LR-Barcode244-LR.NlaIII	6	+
chr13	82005936	82005937	3.MB-P-791-T-Brain_PTS11-791.L-454-SB050:R-454-SB146.NlaIII	1	-
chr13	82105454	82105455	6.MB-P-260-T-Brain_PTS11-260.L-454-SB018:R-454-SB114.NlaIII	1	+
chr13	82246267	82246268	1.MB-P-068-T-Brain_PTS11-068.LR-Barcode258-LR:LR-Barcode244-LR.NlaIII	1	+
chr13	82550629	82550630	3.MB-P-778-T-Brain_PTS11-778.L-454-SB034:R-454-SB130.NlaIII	1	+
chr13	82725359	82725360	3.MB-P-280-T-Brain_PTS11-280.null:R-454-SB107.NlaIII	1	+
chr13	82799242	82799243	3.MB-P-786-T-Brain_PTS11-786.L-454-SB042:R-454-SB138.NlaIII	1	+
chr13	83082193	83082194	3.MB-P-224-T-Brain_PTS11-224.null:R-454-SB103.NlaIII	4	+
chr13	83244337	83244338	3.MB-P-786-T-Brain_PTS11-786.L-454-SB042:R-454-SB138.NlaIII	1	-
chr13	8341735	8341736	3.MB-P-849-T-Brain_PTS11-849.L-454-SB065:R-454-SB161.NlaIII	1	-
chr13	83600614	83600615	3.MB-P-580-T-Brain_PTS11-580.L-454-SB041:R-454-SB137.NlaIII	1	+
chr13	8386283	8386284	6.MB-P-349-T-Brain_PTS11-349.null:R-454-SB122.NlaIII	1	-
chr13	84200855	84200856	4.MB-P-730-T-Brain_PTS11-730.L-454-SB046:R-454-SB142.NlaIII	1	-
chr13	84313155	84313156	1.MB-P-148-T-Brain_PTS11-148.LR-Barcode240-LR:LR-Barcode079-LR.BfaI	1	-
chr13	84372470	84372471	3.MB-P-786-T-Brain_PTS11-786.L-454-SB042:R-454-SB138.NlaIII	1	-
chr13	84377451	84377452	4.MB-P-730-T-Brain_PTS11-730.L-454-SB046:R-454-SB142.BfaI	25	+
chr13	84556551	84556552	3.MB-P-786-T-Brain_PTS11-786.L-454-SB042:R-454-SB138.NlaIII	1	-
chr13	84632260	84632261	3.MB-P-524-T-Brain_PTS11-524.L-454-SB026:R-454-SB122.NlaIII	4	-
chr13	84932134	84932135	1.MB-P-008-T-Brain_PTS11-008.LR-Barcode077-LR:LR-Barcode089-LR.BfaI	1	+
chr13	85040647	85040648	3.MB-P-224-T-Brain_PTS11-224.null:R-454-SB103.NlaIII	1	+
chr13	8512887	8512888	4.MB-P-730-T-Brain_PTS11-730.L-454-SB046:R-454-SB142.NlaIII	1	-
chr13	85279737	85279738	3.MB-P-791-T-Brain_PTS11-791.L-454-SB050:R-454-SB146.NlaIII	4	-
chr13	85363136	85363137	3.MB-P-224-T-Brain_PTS11-224.null:R-454-SB103.NlaIII	1	-
chr13	85397488	85397489	3.MB-P-524-T-Brain_PTS11-524.L-454-SB026:R-454-SB122.NlaIII	2	-
chr13	85558074	85558075	1.MB-P-008-T-Brain_PTS11-008.LR-Barcode077-LR:LR-Barcode089-LR.NlaIII	1	+
chr13	85966967	85966968	1.MB-P-146-T-Brain_PTS11-146.LR-Barcode230-LR:LR-Barcode258-LR.BfaI	1	+
chr13	86046800	86046801	3.MB-P-786-T-Brain_PTS11-786.L-454-SB042:R-454-SB138.NlaIII	1	-
chr13	86066673	86066674	3.MB-P-224-T-Brain_PTS11-224.null:R-454-SB103.NlaIII	2	-
chr13	86198833	86198834	6.MB-P-260-T-Brain_PTS11-260.L-454-SB018:R-454-SB114.NlaIII	1	+
chr13	86303352	86303353	3.MB-P-791-T-Brain_PTS11-791.L-454-SB050:R-454-SB146.NlaIII	1	+
chr13	86390297	86390298	3.MB-P-PM98-T-Brain_PM-98.null:R-454-SB126.NlaIII	1	+
chr13	86563875	86563876	1.MB-P-146-T-Brain_PTS11-146.LR-Barcode230-LR:LR-Barcode258-LR.BfaI	1	-
chr13	86686317	86686318	3.MB-P-524-T-Brain_PTS11-524.L-454-SB026:R-454-SB122.BfaI	3	+
chr13	86809669	86809670	3.MB-P-386-T-Brain_PTS11-386.null:R-454-SB154.NlaIII	1	+
chr13	86944450	86944451	3.MB-P-786-T-Brain_PTS11-786.L-454-SB042:R-454-SB138.BfaI	6	+
chr13	86967022	86967023	3.MB-P-849-T-Brain_PTS11-849.L-454-SB065:R-454-SB161.NlaIII	1	+
chr13	87189233	87189234	1.MB-P-148-T-Brain_PTS11-148.LR-Barcode240-LR:LR-Barcode079-LR.NlaIII	1	-
chr13	87807213	87807214	3.MB-P-421-T-Brain_PTS11-421.null:R-454-SB111.NlaIII	1	-
chr13	87826727	87826728	1.MB-P-068-T-Brain_PTS11-068.LR-Barcode258-LR:LR-Barcode244-LR.NlaIII	1	-
chr13	8791991	8791992	3.MB-P-224-T-Brain_PTS11-224.null:R-454-SB103.NlaIII	1	-
chr13	88110967	88110968	3.MB-P-786-T-Brain_PTS11-786.L-454-SB042:R-454-SB138.NlaIII	1	-
chr13	88158388	88158389	3.MB-P-524-T-Brain_PTS11-524.L-454-SB026:R-454-SB122.NlaIII	2	-
chr13	88214199	88214200	1.MB-P-146-T-Brain_PTS11-146.LR-Barcode230-LR:LR-Barcode258-LR.BfaI	1	-
chr13	88298418	88298419	3.MB-P-386-T-Brain_PTS11-386.null:R-454-SB154.NlaIII	2	-
chr13	88452920	88452921	3.MB-P-280-T-Brain_PTS11-280.null:R-454-SB107.NlaIII	1	-
chr13	88493043	88493044	4.MB-P-730-T-Brain_PTS11-730.L-454-SB046:R-454-SB142.BfaI	2	-
chr13	8868101	8868102	3.MB-P-457-T-Brain_PTS11-457.L-454-SB017:R-454-SB113.NlaIII	1	+
chr13	88874252	88874253	3.MB-P-280-T-Brain_PTS11-280.null:R-454-SB107.NlaIII	2	+
chr13	89027136	89027137	3.MB-P-786-T-Brain_PTS11-786.L-454-SB042:R-454-SB138.NlaIII	1	+
chr13	89148619	89148620	3.MB-P-786-T-Brain_PTS11-786.L-454-SB042:R-454-SB138.NlaIII	1	+
chr13	89150387	89150388	3.MB-P-280-T-Brain_PTS11-280.null:R-454-SB107.NlaIII	2	-
chr13	8925000	8925001	3.MB-P-280-T-Brain_PTS11-280.null:R-454-SB107.NlaIII	2	-
chr13	89265232	89265233	3.MB-P-540-T-Brain_PTS11-540.null:R-454-SB118.NlaIII	1	-
chr13	89998064	89998065	1.MB-P-008-T-Brain_PTS11-008.LR-Barcode077-LR:LR-Barcode089-LR.NlaIII	1	+
chr13	90039092	90039093	1.MB-P-048-T-Brain_PTS11-048.LR-Barcode079-LR:LR-Barcode091-LR.NlaIII	1	+
chr13	90150032	90150033	1.MB-P-008-T-Brain_PTS11-008.LR-Barcode077-LR:LR-Barcode089-LR.NlaIII	1	+
chr13	9015447	9015448	3.MB-P-280-T-Brain_PTS11-280.null:R-454-SB107.NlaIII	1	-
chr13	90243586	90243587	3.MB-P-786-T-Brain_PTS11-786.L-454-SB042:R-454-SB138.BfaI	14	+
chr13	91031036	91031037	3.MB-P-421-T-Brain_PTS11-421.null:R-454-SB111.NlaIII	1	+
chr13	91165537	91165538	6.MB-P-260-T-Brain_PTS11-260.L-454-SB018:R-454-SB114.NlaIII	3	-
chr13	91478455	91478456	3.MB-P-224-T-Brain_PTS11-224.null:R-454-SB103.NlaIII	1	+
chr13	91655550	91655551	3.MB-P-224-T-Brain_PTS11-224.null:R-454-SB103.NlaIII	1	-
chr13	91856015	91856016	3.MB-P-786-T-Brain_PTS11-786.L-454-SB042:R-454-SB138.NlaIII	1	-
chr13	91944929	91944930	3.MB-P-224-T-Brain_PTS11-224.null:R-454-SB103.NlaIII	1	-
chr13	9287056	9287057	1.MB-P-068-T-Brain_PTS11-068.LR-Barcode258-LR:LR-Barcode244-LR.BfaI	1	+
chr13	93097754	93097755	3.MB-P-731-T-Brain_PTS11-731.L-454-SB057:null.BfaI	1	+
chr13	93168478	93168479	3.MB-P-786-T-Brain_PTS11-786.L-454-SB042:R-454-SB138.NlaIII	1	-
chr13	93659772	93659773	3.MB-P-565-T-Brain_PTS11-565.L-454-SB033:R-454-SB129.NlaIII	1	-
chr13	93873195	93873196	3.MB-P-224-T-Brain_PTS11-224.null:R-454-SB103.NlaIII	1	-
chr13	94106894	94106895	3.MB-P-791-T-Brain_PTS11-791.L-454-SB050:R-454-SB146.NlaIII	2	+
chr13	94377547	94377548	3.MB-P-524-T-Brain_PTS11-524.L-454-SB026:R-454-SB122.NlaIII	1	-
chr13	94510802	94510803	1.MB-P-048-T-Brain_PTS11-048.LR-Barcode079-LR:LR-Barcode091-LR.NlaIII	1	+
chr13	95290987	95290988	3.MB-P-580-T-Brain_PTS11-580.L-454-SB041:R-454-SB137.NlaIII	1	-
chr13	95708252	95708253	3.MB-P-224-T-Brain_PTS11-224.null:R-454-SB103.NlaIII	1	+
chr13	95814019	95814020	3.MB-P-224-T-Brain_PTS11-224.null:R-454-SB103.NlaIII	1	+
chr13	95886802	95886803	6.MB-P-833-T-Brain_PTS11-833.L-454-SB057:R-454-SB153.NlaIII	1	+
chr13	96172129	96172130	3.MB-P-786-T-Brain_PTS11-786.L-454-SB042:R-454-SB138.NlaIII	2	-
chr13	96349948	96349949	1.MB-P-008-T-Brain_PTS11-008.LR-Barcode077-LR:LR-Barcode089-LR.NlaIII	1	-
chr13	9650976	9650977	1.MB-P-008-T-Brain_PTS11-008.LR-Barcode077-LR:LR-Barcode089-LR.NlaIII	1	-
chr13	96537087	96537088	8.MB-P-224-T-Brain_PTS11-224.L-454-SB191:null.BfaI	9	+
chr13	96923846	96923847	3.MB-P-791-T-Brain_PTS11-791.L-454-SB050:R-454-SB146.NlaIII	1	-
chr13	96930386	96930387	1.MB-P-068-T-Brain_PTS11-068.LR-Barcode258-LR:LR-Barcode244-LR.NlaIII	1	+
chr13	9705863	9705864	4.MB-P-730-T-Brain_PTS11-730.L-454-SB046:R-454-SB142.NlaIII	1	-
chr13	97316770	97316771	4.MB-P-730-T-Brain_PTS11-730.L-454-SB046:R-454-SB142.NlaIII	2	-
chr13	97355530	97355531	3.MB-P-286-T-Brain_PTS11-286.null:R-454-SB115.NlaIII	3	+
chr13	97367765	97367766	3.MB-P-793-T-Brain_PTS11-793.L-454-SB010:R-454-SB106.NlaIII	1	+
chr13	97419957	97419958	3.MB-P-PM98-T-Brain_PM-98.null:R-454-SB126.NlaIII	1	+
chr13	97467484	97467485	3.MB-P-704-T-Brain_PTS11-704.null:R-454-SB119.NlaIII	1	+
chr13	97603963	97603964	3.MB-P-793-T-Brain_PTS11-793.L-454-SB010:R-454-SB106.NlaIII	1	+
chr13	97606564	97606565	3.MB-P-524-T-Brain_PTS11-524.L-454-SB026:R-454-SB122.NlaIII	1	+
chr13	97615846	97615847	6.MB-P-756-T-Brain_PTS11-756.L-454-SB042:R-454-SB138.NlaIII	1	+
chr13	97663394	97663395	6.MB-P-883-T-Brain_PTS11-883.L-454-SB058:R-454-SB154.NlaIII	1	-
chr13	98106940	98106941	3.MB-P-224-T-Brain_PTS11-224.null:R-454-SB103.NlaIII	1	+
chr13	98231978	98231979	4.MB-P-730-T-Brain_PTS11-730.L-454-SB046:R-454-SB142.NlaIII	1	+
chr13	98521682	98521683	3.MB-P-540-T-Brain_PTS11-540.null:R-454-SB118.NlaIII	2	-
chr13	98574410	98574411	3.MB-P-793-T-Brain_PTS11-793.L-454-SB010:R-454-SB106.NlaIII	1	-
[truncated: 6,360 more rows]
